# Supplementary material for: Presence or absence of a novel charge-transfer complex in the base-catalyzed hydrolysis of N-ethylbenzamide or ethyl benzoate
Source: publisher site journal article supplement (doi:10.3762/bjoc.9.22), 2013-01-29
Supplement: Additional file 1 [file 1860-5397-9-22-S1.pdf]

## Supporting Information

for

# Presence or absence of a novel charge-transfer complex in the base-catalyzed hydrolysis of *N*-ethylbenzamide or ethyl benzoate

Shinichi Yamabe\*, Wei Guan and Shigeyoshi Sakaki

Address: Fukui Institute for Fundamental Chemistry, Kyoto University, Takano-Nishihiraki-cho 34-4, Sakyo-ku, Kyoto 606-8103, Japan, phone: +81-075-711-7907.

Email: [yamabes@fukui.kyoto-u.ac.jp](mailto:yamabes@fukui.kyoto-u.ac.jp)

\*Corresponding author

### Detailed geometric data along with those of complementary calculations

- I.** Figure S1 Geometric changes by an ADMP dynamical calculation from the TS1(es) geometry in the reaction of Ph-C(=O)-O-Et + OH(H<sub>2</sub>O)<sub>16</sub>. XYZ coordinates are in ESI VII [5]. S2
- II.** Figure S2 The geometry optimized by B3LYP/6-31(+)-G(d) SCRF = PCM and (B3PW91/6-311+G(d,p) SCRF = PCM). Can the geometry of the Mulliken charge-transfer complex of benzoic acid (Ph-C(=O)OH) and ethylamine (H<sub>5</sub>C<sub>2</sub>-NH<sub>2</sub>) be expressed by the aid of (H<sub>2</sub>O)<sub>5</sub> and SCRF = PCM solvent effect? The answer is yes. XYZ coordinates are in ESI VII [6]. S2
- III.** Figure S3 Reaction paths of the hydrolysis in Ph-C(=O)-O-Et + NaOH(H<sub>2</sub>O)<sub>16</sub>. XYZ coordinates are in ESI VII [7]. S3
- IV.** Figure S4 Reaction paths of the hydrolysis in Ph-C(=O)-NH-Et + NaOH(H<sub>2</sub>O)<sub>16</sub>. XYZ coordinates are in ESI VII [8]. S4
- V.** Table S1 Dependence of computational methods on TS1(es) geometries in the *n* = 16 ester hydrolysis. S5
- VI.** Table S2 Dependence of computational methods on TS1(am) geometries in the *n* = 16 amide hydrolysis. S5
- VII.** Cartesian Coordinates of B3LYP/6-31(+)-G(d) and B3LYP/6-311+G(d,p) geometry optimizations:
- TS1(es) geometries in Figure 1. Hereafter, *n* denotes the number of water molecules around Ph-COO-Et and OH<sup>-</sup>. S6–S19
  - TS1(am) geometries in Figure 2. Hereafter, *n* denotes the number of water molecules around Ph-CO-NH-Et and OH<sup>-</sup>. S20–S33
  - Geometries of the *n* = 16 ester hydrolysis in Figure 3. S34–S51
- S1

- d. Geometries of the  $n = 16$  amide hydrolysis in Figure 4. S52–S70
- e. The result of ADMP dynamical calculations starting from the  $n = 16$  TS1(es) in Figures 1 and 3. The geometry after 800 femtoseconds shown in Figure S3. S71–S73
- f. Figure S2. The geometry of the Mulliken CT complex composed of benzoic acid, ethylamine and  $(\text{H}_2\text{O})_5$ . Stoichiometry  $\text{C}_9\text{H}_{23}\text{NO}_7$ . S74–S76
- g. The  $\text{Na}^+$ -containing ester hydrolysis shown in Figure S3. S77–S91
- h. The  $\text{Na}^+$ -containing amide hydrolysis shown in Figure S4. S92–S110
- i. B3LYP/6-311+G(d,p) geometries of the reactant-like complex (precursor), TS1(am) and T2(am). S111–S116
- j. para-Y-substituted N-ethylbenzamide +  $\text{OH}^-(\text{H}_2\text{O})_{16}$ , Y = MeO and  $\text{NO}_2$ . Precursor, TS1(am) and TS2(am). S117–S129

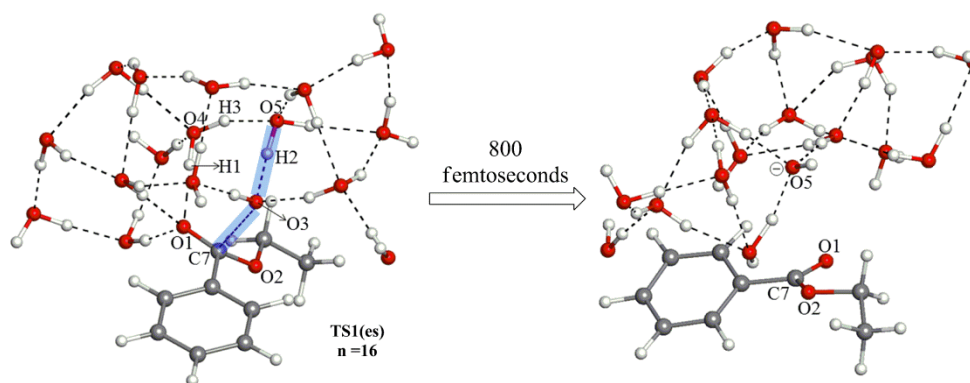

**Figure S1** Geometric changes by an ADMP dynamical calculation from the TS1(es) geometry in the reaction of  $\text{Ph-C(=O)-O-Et} + \text{OH}^-(\text{H}_2\text{O})_{16}$ . XYZ coordinates are in ESI VII [5].

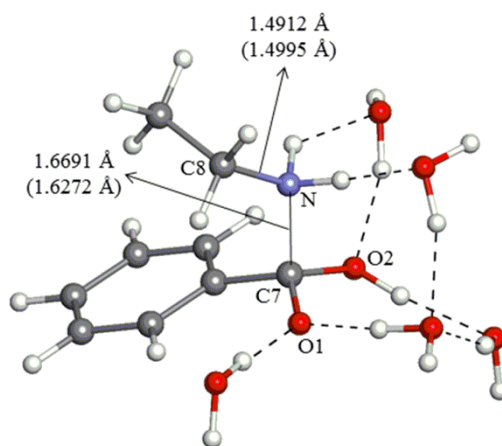

**Figure S2** The geometry optimized by B3LYP/6-31(+)-G(d) SCRF = PCM and (B3PW91/6-311+G(d,p) SCRF = PCM). Can the geometry of the Mulliken charge-transfer complex of benzoic acid ( $\text{Ph-C(=O)OH}$ ) and ethylamine ( $\text{H}_5\text{C}_2\text{-NH}_2$ ) be expressed by the aid of  $(\text{H}_2\text{O})_5$  and SCRF = PCM solvent effect? The answer is yes. XYZ coordinates are in ESI VII [6].

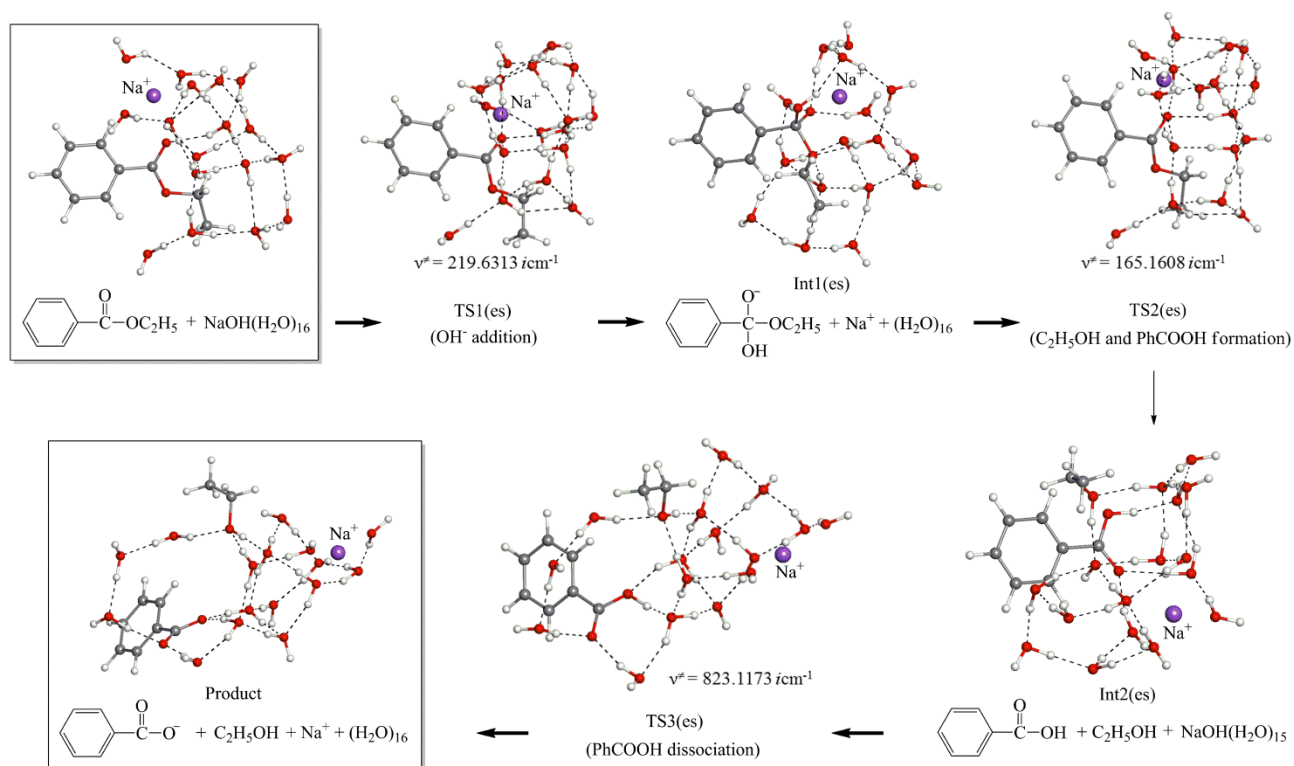

**Figure S3** Reaction paths of the hydrolysis in  $\text{Ph-C(=O)-O-Et} + \text{NaOH}(\text{H}_2\text{O})_{16}$ . XYZ coordinates are in ESI VII [7].

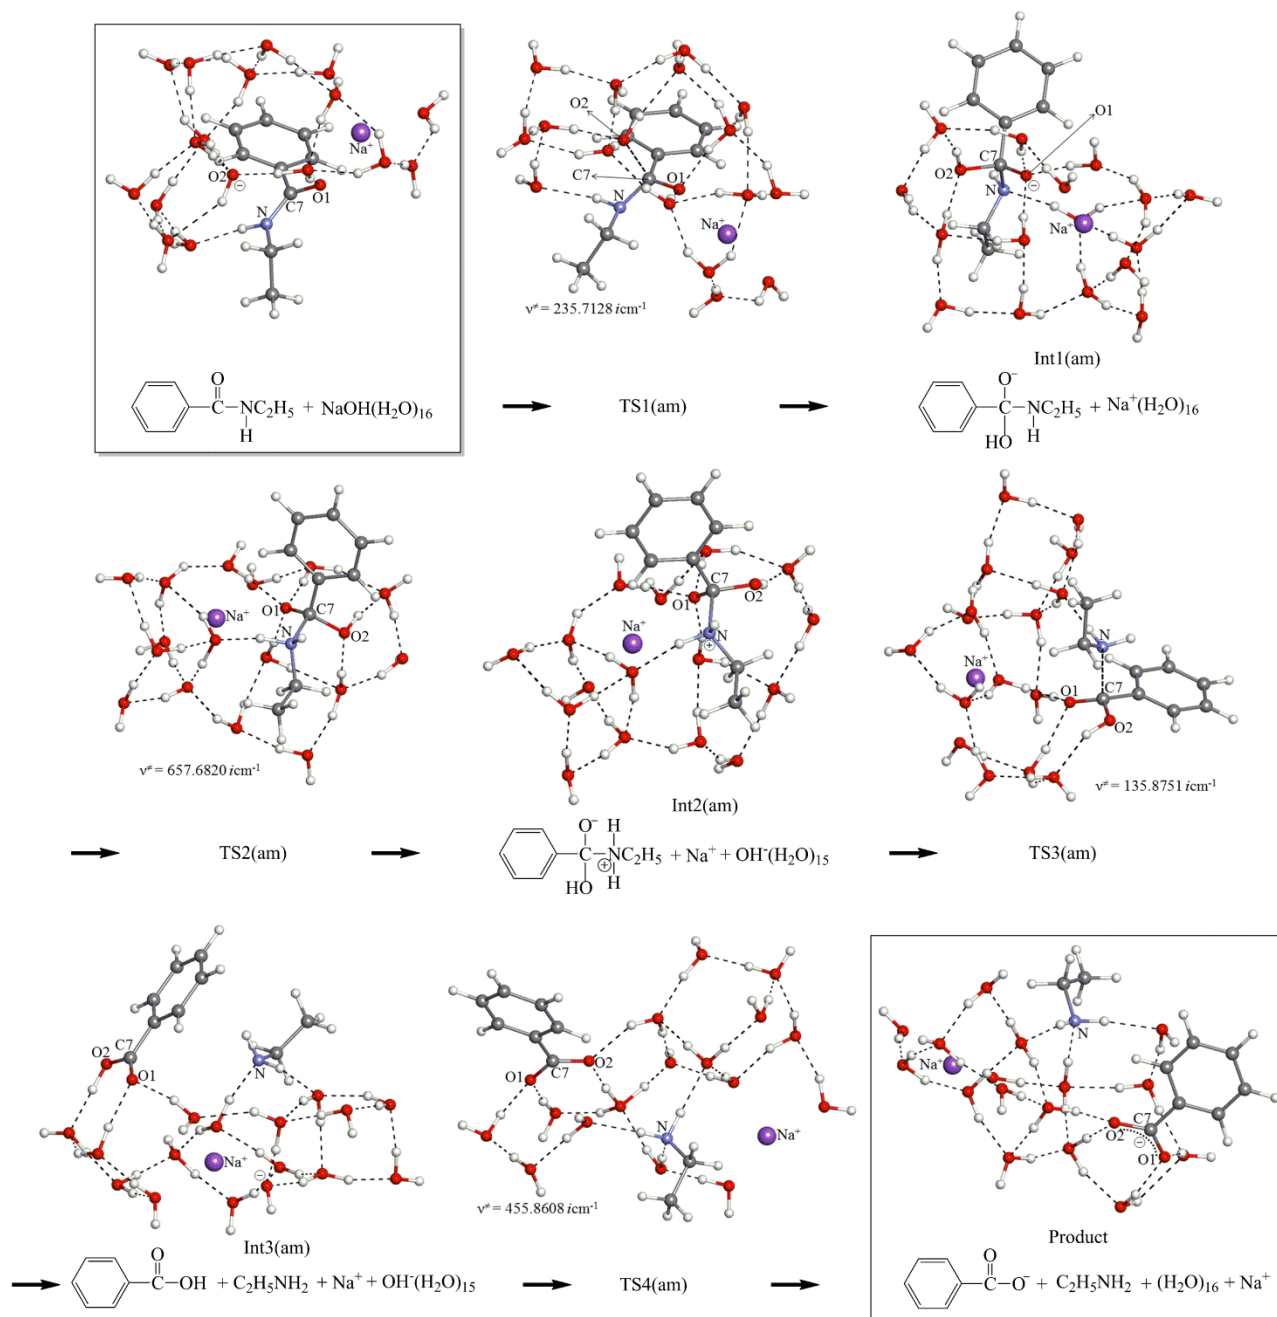

**Figure S4** Reaction paths of the hydrolysis in Ph-C(=O)-NH-Et + NaOH(H<sub>2</sub>O)<sub>16</sub>. XYZ coordinates are in ESI VII [8].

**Table S1** Dependence of computational methods on TS1(es) geometries in the  $n = 16$  ester hydrolysis.<sup>a</sup>

| method                           | $\nu^\ddagger$ ( $\text{icm}^{-1}$ ) | $\text{C}_7 \cdots \text{O}_3$ ( $\text{\AA}$ ) | $\text{O}_3 \cdots \text{H}_2$ ( $\text{\AA}$ ) | $\text{O}_5 \cdots \text{H}_2$ ( $\text{\AA}$ ) |
|----------------------------------|--------------------------------------|-------------------------------------------------|-------------------------------------------------|-------------------------------------------------|
| B3LYP/6-31(+) $\text{G(d)}$      | 200.41                               | 1.990                                           | 1.544                                           | 1.038                                           |
| B3LYP/6-311+ $\text{G(d,p)}$     | 192.01                               | 1.955                                           | 1.570                                           | 1.023                                           |
| B3PW91/6-31(+) $\text{G(d)}$     | 183.61                               | 2.066                                           | 1.467                                           | 1.060                                           |
| PCM/B3PW91/6-31(+) $\text{G(d)}$ | 249.05                               | 2.014                                           | 1.565                                           | 1.032                                           |
| B3PW91/6-311+ $\text{G(d,p)}$    | 197.65                               | 1.997                                           | 1.497                                           | 1.041                                           |
| M06-2X/6-31(+) $\text{G(d)}$     | 278.88                               | 2.041                                           | 1.522                                           | 1.033                                           |

a) The numbering of atoms is shown in Figure 1.

**Table S2** Dependence of computational methods on TS1(am) geometries in the  $n = 16$  amide hydrolysis.<sup>a</sup>

| method                           | $\nu^\ddagger$ ( $\text{icm}^{-1}$ ) | $\text{C}_7 \cdots \text{O}_2$ ( $\text{\AA}$ ) | $\text{O}_2 \cdots \text{H}_2$ ( $\text{\AA}$ ) | $\text{O}_3 \cdots \text{H}_2$ ( $\text{\AA}$ ) |
|----------------------------------|--------------------------------------|-------------------------------------------------|-------------------------------------------------|-------------------------------------------------|
| B3LYP/6-31(+) $\text{G(d)}$      | 152.25                               | 1.723                                           | 1.617                                           | 1.018                                           |
| B3LYP/6-311+ $\text{G(d,p)}$     | 113.80                               | 1.697                                           | 1.645                                           | 1.006                                           |
| B3PW91/6-31(+) $\text{G(d)}$     | 227.51                               | 1.867                                           | 1.576                                           | 1.027                                           |
| PCM/B3PW91/6-31(+) $\text{G(d)}$ | 289.16                               | 1.882                                           | 1.563                                           | 1.028                                           |
| B3PW91/6-311+ $\text{G(d,p)}$    | 215.21                               | 1.761                                           | 1.574                                           | 1.018                                           |
| M06-2X/6-31(+) $\text{G(d)}$     | 271.49                               | 1.889                                           | 1.656                                           | 1.007                                           |

a) The numbering of atoms is shown in Figure 2.

Cartesian Coordinates of B3LYP/6-31(+)-G(d) and B3LYP/6-311+G(d,p) geometry optimizations

[1] TS1(es) geometries in Figure 1. Hereafter, n denotes the number of water molecules around Ph-COO-Et and OH<sup>-</sup>

n=3 TS

ethyl benzoate(C<sub>6</sub>H<sub>5</sub>-COO-C<sub>2</sub>H<sub>5</sub>) and HO-(H<sub>2</sub>O)<sub>3</sub>, HO<sup>-</sup>, addition TS  
zuka03aa.chk

Standard orientation:

| Center<br>Number | Atomic<br>Number | Atomic<br>Type | Coordinates (Angstroms) |           |           |
|------------------|------------------|----------------|-------------------------|-----------|-----------|
|                  |                  |                | X                       | Y         | Z         |
| 1                | 6                | 0              | 0.728327                | -0.592871 | -0.389120 |
| 2                | 6                | 0              | -0.511088               | 0.261283  | -0.588849 |
| 3                | 8                | 0              | -0.517536               | 1.223134  | -1.391341 |
| 4                | 8                | 0              | -0.585852               | 1.003929  | 1.104238  |
| 5                | 1                | 0              | -1.038267               | 1.829453  | 0.861533  |
| 6                | 6                | 0              | 1.845269                | -0.341286 | -1.190251 |
| 7                | 6                | 0              | 2.998526                | -1.117829 | -1.060244 |
| 8                | 6                | 0              | 0.779497                | -1.630564 | 0.550105  |
| 9                | 8                | 0              | -1.643156               | -0.587092 | -0.537163 |
| 10               | 6                | 0              | -2.870805               | 0.027511  | -0.925427 |
| 11               | 1                | 0              | -3.133839               | 0.812045  | -0.202694 |
| 12               | 1                | 0              | -2.749077               | 0.502127  | -1.904450 |
| 13               | 6                | 0              | -3.945021               | -1.049177 | -0.961851 |
| 14               | 1                | 0              | 0.609092                | 2.753086  | -1.100161 |
| 15               | 8                | 0              | 1.194357                | 3.485434  | -0.805908 |
| 16               | 1                | 0              | 1.527247                | 3.170954  | 0.059298  |
| 17               | 1                | 0              | -2.442648               | -1.183515 | 1.850487  |
| 18               | 8                | 0              | -2.214787               | -0.607065 | 2.595601  |
| 19               | 1                | 0              | -1.597485               | 0.042708  | 2.155660  |
| 20               | 1                | 0              | 0.917052                | 1.656884  | 1.576863  |
| 21               | 8                | 0              | 1.722347                | 2.215201  | 1.802937  |
| 22               | 1                | 0              | 1.442228                | 2.741493  | 2.565831  |
| 23               | 1                | 0              | -3.675452               | -1.842499 | -1.668081 |
| 24               | 1                | 0              | -4.087112               | -1.504216 | 0.025287  |
| 25               | 1                | 0              | -4.903265               | -0.616334 | -1.275543 |
| 26               | 6                | 0              | 1.931181                | -2.405695 | 0.679520  |
| 27               | 6                | 0              | 3.044460                | -2.154351 | -0.127274 |
| 28               | 1                | 0              | 1.795792                | 0.471892  | -1.907118 |
| 29               | 1                | 0              | 3.862716                | -0.908767 | -1.687201 |
| 30               | 1                | 0              | -0.078091               | -1.813083 | 1.188482  |
| 31               | 1                | 0              | 1.962363                | -3.204383 | 1.417732  |
| 32               | 1                | 0              | 3.943690                | -2.758294 | -0.022497 |

-----  
SCF Done: E(RB+HF-LYP) = -804.632753111 A.U. after 1 cycles

Conv = 0.1662D-08 -V/T = 2.0094

S\*\*2 = 0.0000

Zero-point correction= 0.258592 (a.u.)  
Thermal correction to Energy= 0.278339  
Thermal correction to Enthalpy= 0.279283  
Thermal correction to Gibbs Free Energy= 0.208811  
Sum of electronic and zero-point Energies= -804.374161  
Sum of electronic and thermal Energies= -804.354414  
Sum of electronic and thermal Enthalpies= -804.353470  
Sum of electronic and thermal Free Energies= -804.423942

n=5 TS

ethyl benzoate and HO-(H2O)5, HO- addition TS1(es)

zuka05a.chk

Standard orientation:

-----  
1 6 0 0.600624 -0.780942 -0.664532  
2 6 0 -0.789370 -0.190240 -0.659086  
3 8 0 -1.099653 0.761281 -1.409456  
4 8 0 -0.660679 0.616081 1.151754  
5 1 0 -1.337170 1.312738 1.064544  
6 6 0 1.482174 -0.399055 -1.680628  
7 6 0 2.766917 -0.942415 -1.743213  
8 6 0 1.017355 -1.713401 0.294353  
9 8 0 -1.716188 -1.180540 -0.375215  
10 6 0 -3.092369 -0.794796 -0.488615  
11 1 0 -3.308041 -0.012796 0.249247  
12 1 0 -3.271029 -0.382743 -1.487143  
13 6 0 -3.945288 -2.027973 -0.240266  
14 1 0 -0.031149 2.413693 -1.257499  
15 8 0 0.263342 3.292104 -0.935891  
16 1 0 0.787736 3.072830 -0.135334  
17 1 0 -1.863412 -1.909431 2.160696  
18 8 0 -1.521889 -1.328218 2.856315  
19 1 0 -1.185733 -0.548566 2.327189  
20 1 0 0.633115 1.470606 1.338222  
21 8 0 1.415846 2.140087 1.432876  
22 1 0 1.275295 2.567557 2.290789  
23 1 0 -3.708954 -2.817905 -0.961741  
24 1 0 -3.786939 -2.424197 0.768881  
25 1 0 -5.006946 -1.772702 -0.340404  
26 6 0 2.300601 -2.255017 0.231788

|    |   |   |           |           |           |
|----|---|---|-----------|-----------|-----------|
| 27 | 6 | 0 | 3.179779  | -1.874386 | -0.788560 |
| 28 | 1 | 0 | 1.150443  | 0.326593  | -2.416093 |
| 29 | 1 | 0 | 3.445587  | -0.634660 | -2.534832 |
| 30 | 1 | 0 | 0.345988  | -1.984667 | 1.101108  |
| 31 | 1 | 0 | 2.619712  | -2.968997 | 0.987064  |
| 32 | 1 | 0 | 4.180073  | -2.299206 | -0.835262 |
| 33 | 1 | 0 | -2.354436 | 2.159263  | -0.753496 |
| 34 | 8 | 0 | -2.520897 | 2.960124  | -0.217814 |
| 35 | 1 | 0 | -1.668038 | 3.431795  | -0.321215 |
| 36 | 1 | 0 | 3.105899  | 1.376397  | 1.398509  |
| 37 | 8 | 0 | 3.974029  | 0.911508  | 1.365319  |
| 38 | 1 | 0 | 3.784176  | 0.114324  | 0.846228  |

-----  
SCF Done: E(RB+HF-LYP) = -957.521199563 A.U. after 1 cycles

Conv = 0.2048D-08 -V/T = 2.0093

S\*\*2 = 0.0000

Zero-point correction= 0.309377 (a.u.)  
Thermal correction to Energy= 0.334313  
Thermal correction to Enthalpy= 0.335257  
Thermal correction to Gibbs Free Energy= 0.253374  
Sum of electronic and zero-point Energies= -957.211822  
Sum of electronic and thermal Energies= -957.186887  
Sum of electronic and thermal Enthalpies= -957.185943  
Sum of electronic and thermal Free Energies= -957.267825

n=8 TS

ethyl benzoate and HO-(H2O)8, HO- addtion TS

zuka03cc.log

Standard orientation:

-----

| Center<br>Number | Atomic<br>Number | Atomic<br>Type | Coordinates (Angstroms) |           |           |
|------------------|------------------|----------------|-------------------------|-----------|-----------|
|                  |                  |                | X                       | Y         | Z         |
| 1                | 6                | 0              | -1.073567               | -0.895704 | -0.625382 |
| 2                | 6                | 0              | -1.793402               | 0.408425  | -0.291537 |
| 3                | 8                | 0              | -1.334862               | 1.511745  | -0.718983 |
| 4                | 8                | 0              | -1.635750               | 0.424046  | 1.434157  |
| 5                | 1                | 0              | -1.761439               | 1.375504  | 1.593949  |
| 6                | 6                | 0              | -0.098352               | -0.877172 | -1.626124 |
| 7                | 6                | 0              | 0.576375                | -2.047622 | -1.983592 |
| 8                | 6                | 0              | -1.372906               | -2.104943 | 0.016980  |
| 9                | 8                | 0              | -3.182115               | 0.167471  | -0.454536 |
| 10               | 6                | 0              | -4.004193               | 1.336830  | -0.497305 |
| 11               | 1                | 0              | -3.994129               | 1.833901  | 0.483403  |

-----



|    |   |   |           |           |           |
|----|---|---|-----------|-----------|-----------|
| 12 | 1 | 0 | -3.599734 | 2.038862  | -1.232472 |
| 13 | 6 | 0 | -5.415839 | 0.902311  | -0.859323 |
| 14 | 1 | 0 | 0.190741  | 2.072760  | -0.189854 |
| 15 | 8 | 0 | 1.066981  | 2.341163  | 0.214288  |
| 16 | 1 | 0 | 1.186752  | 1.712777  | 0.958133  |
| 17 | 1 | 0 | -4.292065 | -1.001827 | 1.540633  |
| 18 | 8 | 0 | -3.873784 | -0.933442 | 2.412761  |
| 19 | 1 | 0 | -3.042994 | -0.445100 | 2.193733  |
| 20 | 1 | 0 | -0.081249 | 0.199837  | 1.898997  |
| 21 | 8 | 0 | 0.909861  | 0.218151  | 2.116011  |
| 22 | 1 | 0 | 0.983646  | 0.288655  | 3.079200  |
| 23 | 1 | 0 | 1.940578  | -1.058635 | 1.358326  |
| 24 | 8 | 0 | 2.510877  | -1.713603 | 0.889800  |
| 25 | 1 | 0 | 1.898862  | -2.228205 | 0.337169  |
| 26 | 1 | 0 | 1.824678  | 4.192662  | 0.451091  |
| 27 | 8 | 0 | 2.539759  | 4.849123  | 0.333473  |
| 28 | 1 | 0 | 3.203378  | 4.337511  | -0.161351 |
| 29 | 1 | 0 | 2.481789  | 2.252747  | -0.781142 |
| 30 | 8 | 0 | 3.370153  | 2.328010  | -1.226264 |
| 31 | 1 | 0 | 3.179389  | 2.410253  | -2.172358 |
| 32 | 1 | 0 | 3.618797  | -0.746570 | -0.350175 |
| 33 | 8 | 0 | 4.371651  | -0.364679 | -0.848556 |
| 34 | 1 | 0 | 4.158859  | 0.587206  | -0.945454 |
| 35 | 1 | 0 | 4.525879  | -2.146995 | 1.425518  |
| 36 | 8 | 0 | 5.480516  | -2.008099 | 1.290382  |
| 37 | 1 | 0 | 5.487364  | -1.365848 | 0.552756  |
| 38 | 1 | 0 | -5.426979 | 0.394418  | -1.829828 |
| 39 | 1 | 0 | -5.827396 | 0.216739  | -0.109588 |
| 40 | 1 | 0 | -6.075748 | 1.776444  | -0.917315 |
| 41 | 6 | 0 | -0.696091 | -3.273583 | -0.334006 |
| 42 | 6 | 0 | 0.281148  | -3.250512 | -1.335938 |
| 43 | 1 | 0 | 0.124919  | 0.065817  | -2.114375 |
| 44 | 1 | 0 | 1.338607  | -2.017681 | -2.757870 |
| 45 | 1 | 0 | -2.124573 | -2.125282 | 0.799243  |
| 46 | 1 | 0 | -0.929497 | -4.204683 | 0.176776  |
| 47 | 1 | 0 | 0.806235  | -4.162542 | -1.610031 |

-----  
SCF Done: E(RB+HF-LYP) = -1186.84664368 A.U. after 1 cycles

Conv = 0.2672D-08 -V/T = 2.0093

S\*\*2 = 0.0000

Zero-point correction= 0.385558 (a.u.)  
Thermal correction to Energy= 0.418605  
Thermal correction to Enthalpy= 0.419550  
Thermal correction to Gibbs Free Energy= 0.316946  
Sum of electronic and zero-point Energies= -1186.461085  
Sum of electronic and thermal Energies= -1186.428038

Sum of electronic and thermal Enthalpies= -1186.427094  
Sum of electronic and thermal Free Energies= -1186.529697

n=12 TS

ethyl benzoate and HO-(H2O)8+4, HO- addition TS  
zuka03dd.chk

Standard orientation:

| -----  |        |        |                         |           |           |  |
|--------|--------|--------|-------------------------|-----------|-----------|--|
| Center | Atomic | Atomic | Coordinates (Angstroms) |           |           |  |
| Number | Number | Type   | X                       | Y         | Z         |  |
| -----  |        |        |                         |           |           |  |
| 1      | 6      | 0      | -0.414011               | -0.492230 | -1.266906 |  |
| 2      | 6      | 0      | -0.935588               | 0.764169  | -0.597454 |  |
| 3      | 8      | 0      | -0.134895               | 1.680437  | -0.230856 |  |
| 4      | 8      | 0      | -1.537625               | 0.034866  | 0.964587  |  |
| 5      | 1      | 0      | -1.508808               | 0.830098  | 1.524497  |  |
| 6      | 6      | 0      | 0.944209                | -0.566339 | -1.587916 |  |
| 7      | 6      | 0      | 1.461469                | -1.694325 | -2.232460 |  |
| 8      | 6      | 0      | -1.255953               | -1.564744 | -1.592771 |  |
| 9      | 8      | 0      | -2.135412               | 1.136008  | -1.198301 |  |
| 10     | 6      | 0      | -2.626848               | 2.447038  | -0.871164 |  |
| 11     | 1      | 0      | -2.854870               | 2.492585  | 0.201727  |  |
| 12     | 1      | 0      | -1.851352               | 3.188531  | -1.082246 |  |
| 13     | 6      | 0      | -3.872704               | 2.696006  | -1.704164 |  |
| 14     | 1      | 0      | 1.031594                | 1.365259  | 1.053926  |  |
| 15     | 8      | 0      | 1.658493                | 1.182243  | 1.800979  |  |
| 16     | 1      | 0      | 1.359077                | 0.326699  | 2.173228  |  |
| 17     | 1      | 0      | -4.215009               | -0.185096 | -0.307764 |  |
| 18     | 8      | 0      | -4.100582               | -0.580909 | 0.570568  |  |
| 19     | 1      | 0      | -3.131527               | -0.396961 | 0.777287  |  |
| 20     | 1      | 0      | -0.400972               | -0.920889 | 1.704727  |  |
| 21     | 8      | 0      | 0.369086                | -1.334187 | 2.212446  |  |
| 22     | 1      | 0      | -0.011830               | -1.751372 | 2.999432  |  |
| 23     | 1      | 0      | 1.483507                | -2.459399 | 1.293842  |  |
| 24     | 8      | 0      | 2.082144                | -3.043897 | 0.773897  |  |
| 25     | 1      | 0      | 1.620227                | -3.184283 | -0.068751 |  |
| 26     | 1      | 0      | 2.501174                | 2.697169  | 2.460575  |  |
| 27     | 8      | 0      | 3.125118                | 3.447048  | 2.588488  |  |
| 28     | 1      | 0      | 3.977431                | 3.012093  | 2.749641  |  |
| 29     | 1      | 0      | 3.355075                | 0.953815  | 0.988086  |  |
| 30     | 8      | 0      | 4.237346                | 0.994749  | 0.561168  |  |
| 31     | 1      | 0      | 4.223885                | 1.864386  | 0.099269  |  |
| 32     | 1      | 0      | 3.596398                | -1.974214 | 0.080876  |  |
| 33     | 8      | 0      | 4.458500                | -1.703474 | -0.292624 |  |

|    |   |   |           |           |           |
|----|---|---|-----------|-----------|-----------|
| 34 | 1 | 0 | 4.546029  | -0.751094 | -0.062897 |
| 35 | 1 | 0 | 3.896266  | -4.136325 | 1.178577  |
| 36 | 8 | 0 | 4.856520  | -4.246693 | 1.062964  |
| 37 | 1 | 0 | 5.106092  | -3.414751 | 0.612383  |
| 38 | 1 | 0 | -3.644556 | 2.626249  | -2.772868 |
| 39 | 1 | 0 | -4.663738 | 1.973232  | -1.473438 |
| 40 | 1 | 0 | -4.263022 | 3.699006  | -1.497820 |
| 41 | 6 | 0 | -0.741545 | -2.693199 | -2.228505 |
| 42 | 6 | 0 | 0.618498  | -2.761125 | -2.552689 |
| 43 | 1 | 0 | 1.601078  | 0.255209  | -1.320812 |
| 44 | 1 | 0 | 2.523259  | -1.740156 | -2.457025 |
| 45 | 1 | 0 | -2.309236 | -1.518428 | -1.338851 |
| 46 | 1 | 0 | -1.401822 | -3.522333 | -2.469751 |
| 47 | 1 | 0 | 1.017737  | -3.640558 | -3.052095 |
| 48 | 1 | 0 | 0.730163  | 2.869154  | -1.215726 |
| 49 | 8 | 0 | 1.279567  | 3.517427  | -1.721760 |
| 50 | 1 | 0 | 1.482372  | 3.077295  | -2.560433 |
| 51 | 1 | 0 | 2.884250  | 3.698604  | -0.755681 |
| 52 | 8 | 0 | 3.716904  | 3.667113  | -0.235048 |
| 53 | 1 | 0 | 3.455000  | 3.840791  | 0.694014  |
| 54 | 1 | 0 | -5.341055 | -2.289549 | 0.836411  |
| 55 | 8 | 0 | -6.196348 | -2.627320 | 1.159526  |
| 56 | 1 | 0 | -6.556875 | -1.850146 | 1.626339  |
| 57 | 1 | 0 | -5.374127 | 0.014434  | 1.717166  |
| 58 | 8 | 0 | -6.185326 | 0.124965  | 2.269264  |
| 59 | 1 | 0 | -5.874901 | 0.152414  | 3.185963  |

-----  
SCF Done: E(RB+HF-LYP) = -1492.61180227 A.U. after 1 cycles

Conv = 0.3406D-08 -V/T = 2.0093

S\*\*2 = 0.0000

Zero-point correction= 0.487061 (a.u.)  
Thermal correction to Energy= 0.531069  
Thermal correction to Enthalpy= 0.532013  
Thermal correction to Gibbs Free Energy= 0.400716  
Sum of electronic and zero-point Energies= -1492.124742  
Sum of electronic and thermal Energies= -1492.080733  
Sum of electronic and thermal Enthalpies= -1492.079789  
Sum of electronic and thermal Free Energies= -1492.211086

n=16 TS

ethyl benzoate + HO-(H2O)16 TS1(es)

molecular formula: C9H43O19(1-)

zuka02aa.chk

Standard orientation:

| Center<br>Number | Atomic<br>Number | Atomic<br>Type | Coordinates (Angstroms) |           |           |
|------------------|------------------|----------------|-------------------------|-----------|-----------|
|                  |                  |                | X                       | Y         | Z         |
| 1                | 6                | 0              | -0.029063               | 2.670394  | -0.007977 |
| 2                | 6                | 0              | -0.333003               | 1.442850  | 0.812460  |
| 3                | 8                | 0              | -1.376670               | 0.754484  | 0.605280  |
| 4                | 8                | 0              | 0.171988                | 1.585091  | 2.066932  |
| 5                | 6                | 0              | -0.139275               | 0.572461  | 3.039007  |
| 6                | 6                | 0              | -1.002168               | 3.171408  | -0.877904 |
| 7                | 6                | 0              | -0.749097               | 4.321731  | -1.629854 |
| 8                | 6                | 0              | 1.198353                | 3.337491  | 0.111139  |
| 9                | 6                | 0              | 0.566257                | 0.950146  | 4.329589  |
| 10               | 1                | 0              | -1.223399               | 0.524903  | 3.180571  |
| 11               | 1                | 0              | 0.203927                | -0.397340 | 2.667420  |
| 12               | 8                | 0              | 1.112393                | 0.292708  | 0.071213  |
| 13               | 1                | 0              | 0.932669                | 0.320348  | -0.890057 |
| 14               | 1                | 0              | 1.114067                | -1.184518 | 0.519889  |
| 15               | 8                | 0              | 1.192987                | -2.180322 | 0.801716  |
| 16               | 1                | 0              | 1.845657                | -2.191722 | 1.527157  |
| 17               | 1                | 0              | 2.282543                | -2.529205 | -0.575781 |
| 18               | 8                | 0              | 3.048589                | -2.485507 | -1.207847 |
| 19               | 1                | 0              | 3.408064                | -1.583854 | -1.018809 |
| 20               | 1                | 0              | 4.170642                | -3.491734 | -0.329493 |
| 21               | 8                | 0              | 4.696286                | -3.933476 | 0.394713  |
| 22               | 1                | 0              | 4.341013                | -4.832240 | 0.461187  |
| 23               | 1                | 0              | 2.010705                | -2.321772 | -2.810826 |
| 24               | 8                | 0              | 1.402411                | -2.060926 | -3.535093 |
| 25               | 1                | 0              | 0.524611                | -2.466652 | -3.319601 |
| 26               | 1                | 0              | 1.016843                | -0.447951 | -3.233872 |
| 27               | 8                | 0              | 0.682451                | 0.445165  | -2.919219 |
| 28               | 1                | 0              | 1.211674                | 1.125550  | -3.359063 |
| 29               | 1                | 0              | 4.222380                | -2.794697 | 1.660728  |
| 30               | 8                | 0              | 3.807768                | -2.051158 | 2.172094  |
| 31               | 1                | 0              | 4.304338                | -1.966378 | 2.999044  |
| 32               | 1                | 0              | -1.780425               | 0.266555  | -1.176166 |
| 33               | 8                | 0              | -1.957116               | 0.073115  | -2.124303 |
| 34               | 1                | 0              | -1.149027               | 0.394229  | -2.581711 |
| 35               | 1                | 0              | -1.491720               | -1.730337 | -2.649809 |
| 36               | 8                | 0              | -1.210496               | -2.637471 | -2.894836 |
| 37               | 1                | 0              | -1.749771               | -3.194595 | -2.285945 |
| 38               | 1                | 0              | -3.752133               | -0.711160 | -2.126512 |
| 39               | 8                | 0              | -4.520913               | -1.258597 | -1.870622 |
| 40               | 1                | 0              | -5.010333               | -0.733016 | -1.199075 |
| 41               | 1                | 0              | -1.479635               | -1.082881 | 0.892639  |
| 42               | 8                | 0              | -1.537605               | -2.041667 | 1.114426  |

|    |   |   |           |           |           |
|----|---|---|-----------|-----------|-----------|
| 43 | 1 | 0 | -0.594979 | -2.336076 | 1.095771  |
| 44 | 1 | 0 | -2.722830 | -2.085136 | 2.424479  |
| 45 | 8 | 0 | -3.492898 | -1.889416 | 3.015905  |
| 46 | 1 | 0 | -4.215209 | -2.436026 | 2.670742  |
| 47 | 1 | 0 | -2.530443 | -3.008100 | -0.197370 |
| 48 | 8 | 0 | -3.023201 | -3.456601 | -0.916608 |
| 49 | 1 | 0 | -3.672187 | -2.781392 | -1.227886 |
| 50 | 1 | 0 | 2.757130  | 0.240645  | 0.083527  |
| 51 | 8 | 0 | 3.733753  | -0.035893 | 0.041959  |
| 52 | 1 | 0 | 3.882110  | -0.538171 | 0.868944  |
| 53 | 1 | 0 | 4.855338  | 1.390809  | -0.064081 |
| 54 | 8 | 0 | 5.487433  | 2.140200  | -0.180177 |
| 55 | 1 | 0 | 5.722263  | 2.112831  | -1.118899 |
| 56 | 1 | 0 | -3.796555 | -0.141584 | 2.455045  |
| 57 | 8 | 0 | -3.878579 | 0.723874  | 1.990145  |
| 58 | 1 | 0 | -3.022635 | 0.840248  | 1.523462  |
| 59 | 1 | 0 | -5.125077 | 0.487778  | 0.813224  |
| 60 | 8 | 0 | -5.812308 | 0.299351  | 0.117364  |
| 61 | 1 | 0 | -6.118306 | 1.164679  | -0.190050 |
| 62 | 6 | 0 | 1.449119  | 4.483124  | -0.640012 |
| 63 | 6 | 0 | 0.475828  | 4.978745  | -1.514168 |
| 64 | 1 | 0 | -1.953836 | 2.658323  | -0.964538 |
| 65 | 1 | 0 | -1.512870 | 4.701300  | -2.304012 |
| 66 | 1 | 0 | 1.955900  | 2.940920  | 0.777266  |
| 67 | 1 | 0 | 2.408934  | 4.984545  | -0.546915 |
| 68 | 1 | 0 | 0.674130  | 5.872185  | -2.101826 |
| 69 | 1 | 0 | 1.650787  | 0.994343  | 4.183860  |
| 70 | 1 | 0 | 0.226743  | 1.928073  | 4.686954  |
| 71 | 1 | 0 | 0.347041  | 0.204541  | 5.102382  |

-----  
SCF Done: E(RB+HF-LYP) = -1798.39889531 A.U. after 1 cycles

Conv = 0.2155D-08 -V/T = 2.0093

S\*\*2 = 0.0000

Zero-point correction= 0.595360 (a.u.)  
Thermal correction to Energy= 0.646200  
Thermal correction to Enthalpy= 0.647145  
Thermal correction to Gibbs Free Energy= 0.506737  
Sum of electronic and zero-point Energies= -1797.803536  
Sum of electronic and thermal Energies= -1797.752695  
Sum of electronic and thermal Enthalpies= -1797.751751  
Sum of electronic and thermal Free Energies= -1797.892158

n=24 TS

ethyl benzoate + HO-(H2O)16+8 TS1(es) n=24

molecular formula: C9H59O27(1-)

zuka02jj.chk

Standard orientation:

| Center<br>Number | Atomic<br>Number | Atomic<br>Type | Coordinates (Angstroms) |           |           |
|------------------|------------------|----------------|-------------------------|-----------|-----------|
|                  |                  |                | X                       | Y         | Z         |
| 1                | 6                | 0              | 0.231153                | -2.101990 | 2.247982  |
| 2                | 6                | 0              | -0.240438               | -2.091777 | 0.815798  |
| 3                | 8                | 0              | -1.197209               | -1.321989 | 0.455577  |
| 4                | 8                | 0              | -0.102901               | -3.320129 | 0.265703  |
| 5                | 6                | 0              | -0.723599               | -3.580083 | -1.011287 |
| 6                | 6                | 0              | -0.488075               | -1.393435 | 3.215261  |
| 7                | 6                | 0              | -0.076800               | -1.407582 | 4.550700  |
| 8                | 6                | 0              | 1.360033                | -2.839215 | 2.632113  |
| 9                | 6                | 0              | -0.443431               | -5.024520 | -1.378149 |
| 10               | 1                | 0              | -1.799038               | -3.402566 | -0.936764 |
| 11               | 1                | 0              | -0.311729               | -2.889657 | -1.754423 |
| 12               | 8                | 0              | 1.336591                | -1.232019 | 0.044905  |
| 13               | 1                | 0              | 1.334708                | -0.375930 | 0.517617  |
| 14               | 1                | 0              | 1.322312                | -0.944645 | -1.427901 |
| 15               | 8                | 0              | 1.320102                | -0.682757 | -2.448945 |
| 16               | 1                | 0              | 1.552087                | -1.483604 | -2.943220 |
| 17               | 1                | 0              | 2.732326                | 0.434606  | -2.365037 |
| 18               | 8                | 0              | 3.503142                | 0.920410  | -1.978729 |
| 19               | 1                | 0              | 3.789866                | 0.311573  | -1.240823 |
| 20               | 1                | 0              | 4.993376                | 1.070126  | -2.923689 |
| 21               | 8                | 0              | 5.905135                | 1.074115  | -3.311413 |
| 22               | 1                | 0              | 6.055825                | 1.975289  | -3.631172 |
| 23               | 1                | 0              | 2.797781                | 2.266346  | -1.078030 |
| 24               | 8                | 0              | 2.480091                | 2.934748  | -0.416395 |
| 25               | 1                | 0              | 1.578943                | 3.226308  | -0.694743 |
| 26               | 1                | 0              | 2.074491                | 1.931546  | 0.995405  |
| 27               | 8                | 0              | 1.676902                | 1.318416  | 1.665021  |
| 28               | 1                | 0              | 2.351195                | 1.154773  | 2.341063  |
| 29               | 1                | 0              | 6.113145                | -2.737728 | -1.800379 |
| 30               | 8                | 0              | 6.143228                | -2.345061 | -0.915963 |
| 31               | 1                | 0              | 6.708848                | -1.525432 | -1.006502 |
| 32               | 1                | 0              | -1.062856               | 0.405150  | 0.884262  |
| 33               | 8                | 0              | -0.996019               | 1.365457  | 1.120476  |
| 34               | 1                | 0              | -0.163455               | 1.431132  | 1.639242  |
| 35               | 1                | 0              | -0.485193               | 2.612644  | -0.129860 |
| 36               | 8                | 0              | -0.258874               | 3.359399  | -0.735855 |
| 37               | 1                | 0              | -0.855062               | 3.204520  | -1.499665 |
| 38               | 1                | 0              | -2.622228               | 2.131759  | 0.990407  |

|    |   |   |           |           |           |
|----|---|---|-----------|-----------|-----------|
| 39 | 8 | 0 | -3.439917 | 2.567485  | 0.653383  |
| 40 | 1 | 0 | -4.141192 | 1.857116  | 0.627390  |
| 41 | 1 | 0 | -1.274490 | -0.649169 | -1.185385 |
| 42 | 8 | 0 | -1.357402 | -0.235296 | -2.081361 |
| 43 | 1 | 0 | -0.440479 | -0.299506 | -2.444533 |
| 44 | 1 | 0 | -2.909267 | -1.013056 | -2.669683 |
| 45 | 8 | 0 | -3.860527 | -1.267440 | -2.649263 |
| 46 | 1 | 0 | -4.322137 | -0.477201 | -3.016846 |
| 47 | 1 | 0 | -2.098357 | 1.384019  | -2.021264 |
| 48 | 8 | 0 | -2.538403 | 2.270228  | -2.069947 |
| 49 | 1 | 0 | -2.938315 | 2.422927  | -1.182230 |
| 50 | 1 | 0 | 3.120145  | -1.206007 | 0.144393  |
| 51 | 8 | 0 | 4.038726  | -0.831662 | 0.045230  |
| 52 | 1 | 0 | 4.650561  | -1.540458 | -0.270794 |
| 53 | 1 | 0 | 5.201889  | 0.408121  | 0.914472  |
| 54 | 8 | 0 | 5.951310  | 1.022875  | 1.061264  |
| 55 | 1 | 0 | 5.573317  | 1.928462  | 1.042223  |
| 56 | 1 | 0 | -4.029139 | -1.475559 | -0.886374 |
| 57 | 8 | 0 | -4.002729 | -1.660386 | 0.090139  |
| 58 | 1 | 0 | -3.047659 | -1.628826 | 0.326971  |
| 59 | 1 | 0 | -4.901877 | -0.241470 | 0.795767  |
| 60 | 8 | 0 | -5.307293 | 0.641876  | 0.965038  |
| 61 | 1 | 0 | -5.357724 | 0.783514  | 1.928690  |
| 62 | 6 | 0 | 1.768608  | -2.851777 | 3.963035  |
| 63 | 6 | 0 | 1.052654  | -2.133690 | 4.926735  |
| 64 | 1 | 0 | -1.372989 | -0.837909 | 2.923523  |
| 65 | 1 | 0 | -0.644475 | -0.852756 | 5.293022  |
| 66 | 1 | 0 | 1.916856  | -3.383395 | 1.877701  |
| 67 | 1 | 0 | 2.650921  | -3.418064 | 4.249535  |
| 68 | 1 | 0 | 1.375787  | -2.142656 | 5.964741  |
| 69 | 1 | 0 | 0.631169  | -5.204986 | -1.492069 |
| 70 | 1 | 0 | -0.828643 | -5.697400 | -0.605354 |
| 71 | 1 | 0 | -0.951591 | -5.258166 | -2.319147 |
| 72 | 1 | 0 | 6.985690  | 0.470367  | -1.896483 |
| 73 | 8 | 0 | 7.411240  | 0.052505  | -1.115968 |
| 74 | 1 | 0 | 7.017762  | 0.504243  | -0.329484 |
| 75 | 1 | 0 | 3.926598  | 3.569631  | 0.433295  |
| 76 | 8 | 0 | 4.759566  | 3.630658  | 0.957050  |
| 77 | 1 | 0 | 5.291918  | 4.321884  | 0.538063  |
| 78 | 1 | 0 | -1.351277 | 4.735394  | 0.131468  |
| 79 | 8 | 0 | -2.107816 | 5.164138  | 0.584198  |
| 80 | 1 | 0 | -2.785931 | 4.462966  | 0.619201  |
| 81 | 1 | 0 | -3.967110 | -3.221330 | -3.024355 |
| 82 | 8 | 0 | -3.900687 | -4.191698 | -2.936898 |
| 83 | 1 | 0 | -4.252146 | -4.374834 | -2.042116 |
| 84 | 1 | 0 | -3.941616 | 1.766770  | -3.084115 |

|    |   |   |           |           |           |
|----|---|---|-----------|-----------|-----------|
| 85 | 8 | 0 | -4.656848 | 1.263092  | -3.548758 |
| 86 | 1 | 0 | -4.593099 | 1.504896  | -4.483944 |
| 87 | 1 | 0 | -2.601001 | 6.878876  | 0.158399  |
| 88 | 8 | 0 | -2.812105 | 7.837345  | 0.079594  |
| 89 | 1 | 0 | -2.427503 | 8.228224  | 0.877386  |
| 90 | 1 | 0 | -4.282606 | 2.746552  | 2.490549  |
| 91 | 8 | 0 | -4.818145 | 2.371916  | 3.220629  |
| 92 | 1 | 0 | -5.445695 | 3.066933  | 3.467505  |
| 93 | 1 | 0 | -4.591780 | -3.380903 | 0.044066  |
| 94 | 8 | 0 | -4.886318 | -4.295433 | -0.182493 |
| 95 | 1 | 0 | -5.853212 | -4.275368 | -0.132879 |

-----  
 SCF Done: E(RB+HF-LYP) = -2409.92783513 A.U. after 1 cycles

Conv = 0.3469D-08 -V/T = 2.0092

S\*\*2 = 0.0000

Zero-point correction= 0.799991 (a.u.)  
 Thermal correction to Energy= 0.871243  
 Thermal correction to Enthalpy= 0.872187  
 Thermal correction to Gibbs Free Energy= 0.684917  
 Sum of electronic and zero-point Energies= -2409.127844  
 Sum of electronic and thermal Energies= -2409.056592  
 Sum of electronic and thermal Enthalpies= -2409.055648  
 Sum of electronic and thermal Free Energies= -2409.242918

n=32 TS

ethyl benzoate and HO-(H2O)32, TS1(es)  
 zuka02ww.g09.chk Stoichiometry: C9H75O35(1-)  
 Standard orientation:

-----

| Center<br>Number | Atomic<br>Number | Atomic<br>Type | Coordinates (Angstroms) |           |           |
|------------------|------------------|----------------|-------------------------|-----------|-----------|
|                  |                  |                | X                       | Y         | Z         |
| 1                | 6                | 0              | -0.732364               | -1.234766 | 2.884903  |
| 2                | 6                | 0              | -1.020399               | -1.308196 | 1.403009  |
| 3                | 8                | 0              | -1.897030               | -0.533649 | 0.878609  |
| 4                | 8                | 0              | -0.901938               | -2.594485 | 0.977416  |
| 5                | 6                | 0              | -1.389196               | -2.944300 | -0.334236 |
| 6                | 6                | 0              | -1.525368               | -0.426985 | 3.705031  |
| 7                | 6                | 0              | -1.287154               | -0.370067 | 5.080585  |
| 8                | 6                | 0              | 0.293631                | -1.999132 | 3.458419  |
| 9                | 6                | 0              | -1.205561               | -4.439966 | -0.511885 |
| 10               | 1                | 0              | -2.445951               | -2.672698 | -0.409616 |
| 11               | 1                | 0              | -0.830966               | -2.376661 | -1.087668 |
| 12               | 8                | 0              | 0.624594                | -0.628838 | 0.755042  |

-----



|    |   |   |           |           |           |
|----|---|---|-----------|-----------|-----------|
| 13 | 1 | 0 | 0.707238  | 0.259244  | 1.164311  |
| 14 | 1 | 0 | 0.769308  | -0.345309 | -0.727551 |
| 15 | 8 | 0 | 0.940585  | -0.064924 | -1.717274 |
| 16 | 1 | 0 | 1.413617  | -0.803162 | -2.134948 |
| 17 | 1 | 0 | 2.110603  | 1.175986  | -1.317040 |
| 18 | 8 | 0 | 2.815092  | 1.848072  | -1.127309 |
| 19 | 1 | 0 | 3.088258  | 1.739819  | -0.176498 |
| 20 | 1 | 0 | 4.138968  | 1.453544  | -2.014384 |
| 21 | 8 | 0 | 4.974793  | 1.090767  | -2.441080 |
| 22 | 1 | 0 | 4.778180  | 0.931806  | -3.389673 |
| 23 | 1 | 0 | 1.857788  | 3.431206  | -0.755832 |
| 24 | 8 | 0 | 1.533549  | 4.120411  | -0.137363 |
| 25 | 1 | 0 | 0.611751  | 4.336518  | -0.409368 |
| 26 | 1 | 0 | 1.118318  | 2.912402  | 1.212357  |
| 27 | 8 | 0 | 0.969004  | 2.194960  | 1.874658  |
| 28 | 1 | 0 | 1.879766  | 2.012634  | 2.184649  |
| 29 | 1 | 0 | 4.243675  | -0.689106 | -2.107747 |
| 30 | 8 | 0 | 3.841875  | -1.576765 | -2.234540 |
| 31 | 1 | 0 | 4.587037  | -2.198722 | -2.060475 |
| 32 | 1 | 0 | -1.814043 | 1.261333  | 1.270265  |
| 33 | 8 | 0 | -1.770613 | 2.213886  | 1.528978  |
| 34 | 1 | 0 | -0.917190 | 2.281852  | 2.010300  |
| 35 | 1 | 0 | -1.410165 | 3.523692  | 0.232701  |
| 36 | 8 | 0 | -1.245509 | 4.235379  | -0.429639 |
| 37 | 1 | 0 | -1.815988 | 3.973260  | -1.180205 |
| 38 | 1 | 0 | -3.533594 | 2.880296  | 1.340565  |
| 39 | 8 | 0 | -4.294182 | 3.180300  | 0.797739  |
| 40 | 1 | 0 | -5.061971 | 2.613726  | 1.037844  |
| 41 | 1 | 0 | -1.799188 | -0.006170 | -0.798431 |
| 42 | 8 | 0 | -1.804913 | 0.351312  | -1.725130 |
| 43 | 1 | 0 | -0.859481 | 0.302031  | -1.995059 |
| 44 | 1 | 0 | -3.197122 | -0.495349 | -2.543799 |
| 45 | 8 | 0 | -4.142083 | -0.762887 | -2.635516 |
| 46 | 1 | 0 | -4.594164 | 0.017449  | -3.026695 |
| 47 | 1 | 0 | -2.751726 | 1.921286  | -1.689377 |
| 48 | 8 | 0 | -3.325850 | 2.722114  | -1.754521 |
| 49 | 1 | 0 | -3.727207 | 2.857625  | -0.855119 |
| 50 | 1 | 0 | 2.092125  | -1.399508 | 0.775444  |
| 51 | 8 | 0 | 3.010821  | -1.780836 | 0.581378  |
| 52 | 1 | 0 | 3.098575  | -1.765536 | -0.393653 |
| 53 | 1 | 0 | 4.228121  | -3.028499 | 1.234685  |
| 54 | 8 | 0 | 5.175172  | -3.252394 | 1.400506  |
| 55 | 1 | 0 | 5.507074  | -2.435380 | 1.832209  |
| 56 | 1 | 0 | -4.416835 | -0.754509 | -0.836345 |
| 57 | 8 | 0 | -4.567199 | -0.831918 | 0.137589  |
| 58 | 1 | 0 | -3.668315 | -0.856031 | 0.542035  |

|     |   |   |           |           |           |
|-----|---|---|-----------|-----------|-----------|
| 59  | 1 | 0 | -5.579039 | 0.475946  | 0.771416  |
| 60  | 8 | 0 | -6.226294 | 1.190198  | 0.998440  |
| 61  | 1 | 0 | -6.945584 | 0.729004  | 1.486264  |
| 62  | 6 | 0 | 0.530538  | -1.939610 | 4.829132  |
| 63  | 6 | 0 | -0.258285 | -1.122417 | 5.644901  |
| 64  | 1 | 0 | -2.330548 | 0.153156  | 3.268252  |
| 65  | 1 | 0 | -1.909450 | 0.263611  | 5.706745  |
| 66  | 1 | 0 | 0.902528  | -2.631002 | 2.821153  |
| 67  | 1 | 0 | 1.333799  | -2.529741 | 5.262838  |
| 68  | 1 | 0 | -0.069625 | -1.074531 | 6.714462  |
| 69  | 1 | 0 | -0.143860 | -4.710805 | -0.510652 |
| 70  | 1 | 0 | -1.701567 | -4.980427 | 0.300726  |
| 71  | 1 | 0 | -1.665112 | -4.760248 | -1.452670 |
| 72  | 1 | 0 | 6.237282  | 0.295090  | -1.423710 |
| 73  | 8 | 0 | 6.832623  | -0.134510 | -0.765700 |
| 74  | 1 | 0 | 6.870517  | -1.083633 | -1.014804 |
| 75  | 1 | 0 | 3.854405  | -0.984060 | -4.119406 |
| 76  | 8 | 0 | 4.116051  | -0.284298 | -4.755237 |
| 77  | 1 | 0 | 3.340691  | -0.108332 | -5.308336 |
| 78  | 1 | 0 | -2.569335 | 5.658939  | 0.296994  |
| 79  | 8 | 0 | -3.424513 | 6.012151  | 0.607307  |
| 80  | 1 | 0 | -3.957415 | 5.206796  | 0.743358  |
| 81  | 1 | 0 | -5.095526 | -2.388329 | -2.859942 |
| 82  | 8 | 0 | -5.690263 | -3.164059 | -2.788415 |
| 83  | 1 | 0 | -6.312314 | -2.927565 | -2.069533 |
| 84  | 1 | 0 | -4.597899 | 2.212332  | -2.753114 |
| 85  | 8 | 0 | -5.293153 | 1.711941  | -3.275270 |
| 86  | 1 | 0 | -5.408832 | 2.180293  | -4.115052 |
| 87  | 1 | 0 | 5.770598  | -2.947519 | -0.265496 |
| 88  | 8 | 0 | 6.113364  | -2.840574 | -1.189776 |
| 89  | 1 | 0 | 6.550020  | -3.699570 | -1.342172 |
| 90  | 1 | 0 | 4.396548  | -0.738686 | 1.218331  |
| 91  | 8 | 0 | 5.246147  | -0.416431 | 1.605464  |
| 92  | 1 | 0 | 5.834859  | -0.240968 | 0.837538  |
| 93  | 1 | 0 | -6.219700 | -1.755753 | -0.159170 |
| 94  | 8 | 0 | -7.110930 | -1.840660 | -0.559379 |
| 95  | 1 | 0 | -7.228084 | -0.992566 | -1.060025 |
| 96  | 1 | 0 | 6.151187  | -4.809989 | 0.824634  |
| 97  | 8 | 0 | 6.681134  | -5.303040 | 0.163770  |
| 98  | 1 | 0 | 6.459417  | -6.238164 | 0.277440  |
| 99  | 1 | 0 | 4.414665  | 1.300008  | 1.737479  |
| 100 | 8 | 0 | 3.702646  | 1.929525  | 1.493108  |
| 101 | 1 | 0 | 4.090805  | 2.839927  | 1.377566  |
| 102 | 1 | 0 | -7.050129 | 1.132943  | -0.689195 |
| 103 | 8 | 0 | -7.383013 | 0.753358  | -1.534220 |
| 104 | 1 | 0 | -6.786901 | 1.114055  | -2.222005 |

|     |   |   |           |           |           |
|-----|---|---|-----------|-----------|-----------|
| 105 | 1 | 0 | 5.806990  | 2.936183  | -1.863730 |
| 106 | 8 | 0 | 6.166629  | 3.662253  | -1.321180 |
| 107 | 1 | 0 | 6.973823  | 3.279021  | -0.912189 |
| 108 | 1 | 0 | 3.488343  | 4.672655  | 0.392248  |
| 109 | 8 | 0 | 4.371549  | 4.434409  | 0.735512  |
| 110 | 1 | 0 | 4.958385  | 4.287566  | -0.042500 |
| 111 | 1 | 0 | 8.014109  | 1.241888  | -0.431297 |
| 112 | 8 | 0 | 8.381916  | 2.149313  | -0.340712 |
| 113 | 1 | 0 | 9.170667  | 2.175759  | -0.901557 |
| 114 | 1 | 0 | -4.613998 | -4.607638 | -2.610894 |
| 115 | 8 | 0 | -3.991033 | -5.373897 | -2.622718 |
| 116 | 1 | 0 | -4.305321 | -5.929852 | -3.350097 |
| 117 | 1 | 0 | -8.005223 | -1.213489 | 0.947414  |
| 118 | 8 | 0 | -8.274874 | -0.640282 | 1.706798  |
| 119 | 1 | 0 | -9.178957 | -0.355968 | 1.506968  |

-----  
SCF Done: E(RB3LYP) = -3021.46919438 A.U. after 1 cycles

Convg = 0.1651D-08 -V/T = 2.0092

Zero-point correction= 1.010357 (a.u.)

Thermal correction to Energy= 1.099222

Thermal correction to Enthalpy= 1.100167

Thermal correction to Gibbs Free Energy= 0.877552

Sum of electronic and zero-point Energies= -3020.458837

Sum of electronic and thermal Energies= -3020.369972

Sum of electronic and thermal Enthalpies= -3020.369028

Sum of electronic and thermal Free Energies= -3020.591642  
=====

[2] TS1(am) geometries in Figure 2. Hereafter, n denotes the number of water molecules around Ph-CO-NH-Et and OH-

n=3 TS

N-ethyl benzamide(C6H5-C(=O)-NHC2H5) and HO-(H2O)3, HO- addition TS1(am)

tuka03aa.chk Stoichiometry: C9H18NO5(1-)

Standard orientation:

| Center Number | Atomic Number | Atomic Type | Coordinates (Angstroms) |           |           |
|---------------|---------------|-------------|-------------------------|-----------|-----------|
|               |               |             | X                       | Y         | Z         |
| 1             | 6             | 0           | 0.708812                | -0.588882 | -0.364345 |
| 2             | 6             | 0           | -0.536797               | 0.266755  | -0.537381 |
| 3             | 8             | 0           | -0.536664               | 1.244188  | -1.333203 |
| 4             | 8             | 0           | -0.499883               | 1.066827  | 1.182326  |
| 5             | 1             | 0           | -0.934259               | 1.893742  | 0.913961  |
| 6             | 6             | 0           | 1.764560                | -0.424831 | -1.266695 |
| 7             | 6             | 0           | 2.905266                | -1.224411 | -1.173991 |
| 8             | 6             | 0           | 0.811885                | -1.561976 | 0.640443  |
| 9             | 7             | 0           | -1.740404               | -0.550894 | -0.428235 |
| 10            | 6             | 0           | -2.955327               | 0.059799  | -0.970550 |
| 11            | 1             | 0           | -3.164482               | 0.955563  | -0.376369 |
| 12            | 1             | 0           | -2.814370               | 0.399190  | -2.006761 |
| 13            | 6             | 0           | -4.133210               | -0.909304 | -0.878856 |
| 14            | 1             | 0           | 0.715493                | 2.667542  | -1.135889 |
| 15            | 8             | 0           | 1.372784                | 3.361936  | -0.903853 |
| 16            | 1             | 0           | 1.705173                | 3.067392  | -0.031255 |
| 17            | 1             | 0           | -2.332987               | -0.944320 | 1.684526  |
| 18            | 8             | 0           | -2.172292               | -0.582537 | 2.575950  |
| 19            | 1             | 0           | -1.529947               | 0.128586  | 2.313208  |
| 20            | 1             | 0           | 1.027121                | 1.665929  | 1.565115  |
| 21            | 8             | 0           | 1.875778                | 2.181075  | 1.749321  |
| 22            | 1             | 0           | 1.641483                | 2.773769  | 2.478227  |
| 23            | 1             | 0           | -3.940600               | -1.827837 | -1.450952 |
| 24            | 1             | 0           | -4.334097               | -1.194868 | 0.159971  |
| 25            | 1             | 0           | -5.041564               | -0.451810 | -1.289909 |
| 26            | 6             | 0           | 1.951390                | -2.362074 | 0.729527  |
| 27            | 6             | 0           | 3.000347                | -2.198981 | -0.179250 |
| 28            | 1             | 0           | 1.677862                | 0.342642  | -2.029225 |
| 29            | 1             | 0           | 3.722145                | -1.082561 | -1.878456 |
| 30            | 1             | 0           | 0.011125                | -1.661563 | 1.366834  |
| 31            | 1             | 0           | 2.025778                | -3.106032 | 1.519968  |
| 32            | 1             | 0           | 3.890470                | -2.820593 | -0.104586 |
| 33            | 1             | 0           | -1.560869               | -1.456984 | -0.858505 |

SCF Done: E(RB+HF-LYP) = -784.753767799 A.U. after 1 cycles

Convgt = 0.2480D-08 -V/T = 2.0095

S\*\*2 = 0.0000

Zero-point correction= 0.271480 (a.u.)  
Thermal correction to Energy= 0.291173  
Thermal correction to Enthalpy= 0.292117  
Thermal correction to Gibbs Free Energy= 0.222385  
Sum of electronic and zero-point Energies= -784.482288  
Sum of electronic and thermal Energies= -784.462595  
Sum of electronic and thermal Enthalpies= -784.461651  
Sum of electronic and thermal Free Energies= -784.531383

n=5 TS

N-ethyl benzamide and HO-(H2O)5 HO- addition TS1(am)

tuka05a.chk Stoichiometry C9H22NO7(1-)

Standard orientation:

| -----  |        |        |                         |           |           |  |
|--------|--------|--------|-------------------------|-----------|-----------|--|
| Center | Atomic | Atomic | Coordinates (Angstroms) |           |           |  |
| Number | Number | Type   | X                       | Y         | Z         |  |
| -----  |        |        |                         |           |           |  |
| 1      | 6      | 0      | 0.585987                | -0.786118 | -0.586881 |  |
| 2      | 6      | 0      | -0.796340               | -0.158222 | -0.527575 |  |
| 3      | 8      | 0      | -1.087206               | 0.797095  | -1.310431 |  |
| 4      | 8      | 0      | -0.574539               | 0.676786  | 1.173720  |  |
| 5      | 1      | 0      | -1.249803               | 1.375895  | 1.089372  |  |
| 6      | 6      | 0      | 1.406892                | -0.496239 | -1.682068 |  |
| 7      | 6      | 0      | 2.667259                | -1.085523 | -1.797838 |  |
| 8      | 6      | 0      | 1.043266                | -1.673626 | 0.398488  |  |
| 9      | 7      | 0      | -1.805294               | -1.138027 | -0.222638 |  |
| 10     | 6      | 0      | -3.181149               | -0.795793 | -0.583512 |  |
| 11     | 1      | 0      | -3.461285               | 0.098139  | -0.016886 |  |
| 12     | 1      | 0      | -3.270321               | -0.535158 | -1.648405 |  |
| 13     | 6      | 0      | -4.128486               | -1.942516 | -0.235422 |  |
| 14     | 1      | 0      | -0.016743               | 2.373700  | -1.266311 |  |
| 15     | 8      | 0      | 0.330022                | 3.264043  | -1.029459 |  |
| 16     | 1      | 0      | 0.886502                | 3.081880  | -0.243746 |  |
| 17     | 1      | 0      | -1.930686               | -1.643460 | 2.075721  |  |
| 18     | 8      | 0      | -1.527600               | -1.253434 | 2.870185  |  |
| 19     | 1      | 0      | -1.114328               | -0.452760 | 2.450785  |  |
| 20     | 1      | 0      | 0.756756                | 1.527089  | 1.309220  |  |
| 21     | 8      | 0      | 1.558820                | 2.169357  | 1.355835  |  |
| 22     | 1      | 0      | 1.459058                | 2.636176  | 2.198797  |  |
| 23     | 1      | 0      | -3.860475               | -2.861643 | -0.774933 |  |
| 24     | 1      | 0      | -4.109061               | -2.162553 | 0.838023  |  |
| 25     | 1      | 0      | -5.157586               | -1.686572 | -0.513261 |  |
| 26     | 6      | 0      | 2.302591                | -2.264053 | 0.280287  |  |

|    |   |   |           |           |           |
|----|---|---|-----------|-----------|-----------|
| 27 | 6 | 0 | 3.118334  | -1.974749 | -0.818955 |
| 28 | 1 | 0 | 1.044363  | 0.199347  | -2.432106 |
| 29 | 1 | 0 | 3.298894  | -0.847490 | -2.650318 |
| 30 | 1 | 0 | 0.426034  | -1.866551 | 1.270747  |
| 31 | 1 | 0 | 2.653472  | -2.940703 | 1.055780  |
| 32 | 1 | 0 | 4.099937  | -2.434961 | -0.907836 |
| 33 | 1 | 0 | -1.529178 | -2.053181 | -0.569278 |
| 34 | 1 | 0 | -2.286071 | 2.186671  | -0.707098 |
| 35 | 8 | 0 | -2.463287 | 3.017865  | -0.217965 |
| 36 | 1 | 0 | -1.617446 | 3.491488  | -0.354601 |
| 37 | 1 | 0 | 3.220428  | 1.343512  | 1.289452  |
| 38 | 8 | 0 | 4.069785  | 0.847018  | 1.238899  |
| 39 | 1 | 0 | 3.836489  | 0.048509  | 0.739923  |

-----  
SCF Done: E(RB+HF-LYP) = -937.643011233 A.U. after 1 cycles

Conv = 0.2280D-08 -V/T = 2.0094

S\*\*2 = 0.0000

Zero-point correction= 0.322152 (a.u.)  
Thermal correction to Energy= 0.347208  
Thermal correction to Enthalpy= 0.348152  
Thermal correction to Gibbs Free Energy= 0.265947  
Sum of electronic and zero-point Energies= -937.320859  
Sum of electronic and thermal Energies= -937.295803  
Sum of electronic and thermal Enthalpies= -937.294859  
Sum of electronic and thermal Free Energies= -937.377064

n=8 TS

N-ethyl benzamide and HO-(H2O)8, HO- addition TS1(am)

tuka03cc.chk Stoichiometry: C9H28NO10(1-)

Standard orientation:

-----

| Center<br>Number | Atomic<br>Number | Atomic<br>Type | Coordinates (Angstroms) |           |           |
|------------------|------------------|----------------|-------------------------|-----------|-----------|
|                  |                  |                | X                       | Y         | Z         |
| 1                | 6                | 0              | -1.037207               | -0.909048 | -0.613492 |
| 2                | 6                | 0              | -1.818637               | 0.360519  | -0.286756 |
| 3                | 8                | 0              | -1.375714               | 1.488666  | -0.674703 |
| 4                | 8                | 0              | -1.594693               | 0.358990  | 1.510894  |
| 5                | 1                | 0              | -1.772361               | 1.302681  | 1.665436  |
| 6                | 6                | 0              | -0.045803               | -0.849282 | -1.598436 |
| 7                | 6                | 0              | 0.670230                | -1.994106 | -1.957385 |
| 8                | 6                | 0              | -1.311807               | -2.136313 | 0.009151  |
| 9                | 7                | 0              | -3.252419               | 0.109252  | -0.403369 |
| 10               | 6                | 0              | -4.086703               | 1.305174  | -0.566950 |
| 11               | 1                | 0              | -3.989788               | 1.903944  | 0.345090  |

-----

|    |   |   |           |           |           |
|----|---|---|-----------|-----------|-----------|
| 12 | 1 | 0 | -3.732335 | 1.935765  | -1.393611 |
| 13 | 6 | 0 | -5.548489 | 0.913486  | -0.774224 |
| 14 | 1 | 0 | 0.144752  | 2.069968  | -0.165648 |
| 15 | 8 | 0 | 1.024112  | 2.354373  | 0.222678  |
| 16 | 1 | 0 | 1.161032  | 1.731923  | 0.970112  |
| 17 | 1 | 0 | -4.028993 | -0.862092 | 1.350220  |
| 18 | 8 | 0 | -3.867977 | -1.061896 | 2.294001  |
| 19 | 1 | 0 | -2.998267 | -0.611446 | 2.377601  |
| 20 | 1 | 0 | -0.068044 | 0.218457  | 1.916746  |
| 21 | 8 | 0 | 0.936137  | 0.256174  | 2.126177  |
| 22 | 1 | 0 | 1.017148  | 0.359946  | 3.085712  |
| 23 | 1 | 0 | 1.983556  | -1.003198 | 1.407583  |
| 24 | 8 | 0 | 2.562898  | -1.658995 | 0.947524  |
| 25 | 1 | 0 | 1.955560  | -2.195625 | 0.411632  |
| 26 | 1 | 0 | 1.745988  | 4.207767  | 0.457775  |
| 27 | 8 | 0 | 2.446512  | 4.881122  | 0.343779  |
| 28 | 1 | 0 | 3.123883  | 4.384904  | -0.147812 |
| 29 | 1 | 0 | 2.429822  | 2.286755  | -0.778044 |
| 30 | 8 | 0 | 3.313907  | 2.371995  | -1.231637 |
| 31 | 1 | 0 | 3.112342  | 2.474757  | -2.173409 |
| 32 | 1 | 0 | 3.610779  | -0.692576 | -0.341565 |
| 33 | 8 | 0 | 4.335182  | -0.315876 | -0.884415 |
| 34 | 1 | 0 | 4.116129  | 0.634946  | -0.979164 |
| 35 | 1 | 0 | 4.595736  | -2.079970 | 1.393626  |
| 36 | 8 | 0 | 5.543666  | -1.956719 | 1.205380  |
| 37 | 1 | 0 | 5.519643  | -1.317411 | 0.465717  |
| 38 | 1 | 0 | -5.672714 | 0.299604  | -1.676971 |
| 39 | 1 | 0 | -5.933412 | 0.342730  | 0.078292  |
| 40 | 1 | 0 | -6.171055 | 1.807455  | -0.897822 |
| 41 | 6 | 0 | -0.595041 | -3.280122 | -0.347202 |
| 42 | 6 | 0 | 0.398023  | -3.214074 | -1.331303 |
| 43 | 1 | 0 | 0.158809  | 0.106643  | -2.069865 |
| 44 | 1 | 0 | 1.447422  | -1.931046 | -2.714449 |
| 45 | 1 | 0 | -2.069539 | -2.183769 | 0.785226  |
| 46 | 1 | 0 | -0.807352 | -4.224037 | 0.149072  |
| 47 | 1 | 0 | 0.955474  | -4.106013 | -1.607510 |
| 48 | 1 | 0 | -3.406925 | -0.545899 | -1.168231 |

-----  
SCF Done: E(RB+HF-LYP) = -1166.96917346 A.U. after 1 cycles

Convg = 0.3693D-08 -V/T = 2.0094

S\*\*2 = 0.0000

Zero-point correction= 0.398417 (a.u.)

Thermal correction to Energy= 0.431309

Thermal correction to Enthalpy= 0.432253

Thermal correction to Gibbs Free Energy= 0.330715

Sum of electronic and zero-point Energies= -1166.570757

Sum of electronic and thermal Energies= -1166.537864  
 Sum of electronic and thermal Enthalpies= -1166.536920  
 Sum of electronic and thermal Free Energies= -1166.638458

n=12 TS

N-ethyl benzamide and HO-(H2O)12, HO- addition TS, TS1(am)  
 tuka03dd.chk Stoichiometry C9H36NO14(1-)

Standard orientation:

| Center<br>Number | Atomic<br>Number | Atomic<br>Type | Coordinates (Angstroms) |           |           |
|------------------|------------------|----------------|-------------------------|-----------|-----------|
|                  |                  |                | X                       | Y         | Z         |
| 1                | 6                | 0              | 0.157672                | -1.035726 | -1.168732 |
| 2                | 6                | 0              | -0.962084               | -0.024549 | -0.960683 |
| 3                | 8                | 0              | -0.718930               | 1.215678  | -1.183615 |
| 4                | 8                | 0              | -1.071149               | -0.152129 | 0.887198  |
| 5                | 1                | 0              | -1.602918               | 0.640954  | 1.114640  |
| 6                | 6                | 0              | 1.258200                | -0.663056 | -1.949717 |
| 7                | 6                | 0              | 2.287236                | -1.570362 | -2.208860 |
| 8                | 6                | 0              | 0.095935                | -2.340036 | -0.655906 |
| 9                | 7                | 0              | -2.224464               | -0.556847 | -1.374470 |
| 10               | 6                | 0              | -3.265021               | 0.383662  | -1.802075 |
| 11               | 1                | 0              | -3.525004               | 1.018259  | -0.950185 |
| 12               | 1                | 0              | -2.901316               | 1.049655  | -2.597563 |
| 13               | 6                | 0              | -4.505509               | -0.373504 | -2.270727 |
| 14               | 1                | 0              | 0.593626                | 1.924783  | -0.373116 |
| 15               | 8                | 0              | 1.293194                | 2.384295  | 0.181699  |
| 16               | 1                | 0              | 1.404495                | 1.779918  | 0.953599  |
| 17               | 1                | 0              | -3.272489               | -1.838256 | 0.332469  |
| 18               | 8                | 0              | -2.991649               | -1.939773 | 1.259739  |
| 19               | 1                | 0              | -2.197298               | -1.318456 | 1.261792  |
| 20               | 1                | 0              | 0.292155                | 0.057838  | 1.604569  |
| 21               | 8                | 0              | 1.210127                | 0.298464  | 2.014954  |
| 22               | 1                | 0              | 1.080485                | 0.364270  | 2.972611  |
| 23               | 1                | 0              | 2.594822                | -0.731409 | 1.536360  |
| 24               | 8                | 0              | 3.368135                | -1.257492 | 1.216579  |
| 25               | 1                | 0              | 2.989923                | -1.916560 | 0.611607  |
| 26               | 1                | 0              | 0.561204                | 3.919155  | 0.578203  |
| 27               | 8                | 0              | 0.011989                | 4.742463  | 0.672424  |
| 28               | 1                | 0              | 0.534835                | 5.452073  | 0.271781  |
| 29               | 1                | 0              | 2.866984                | 2.647225  | -0.598323 |
| 30               | 8                | 0              | 3.756373                | 2.798921  | -1.007598 |
| 31               | 1                | 0              | 3.624424                | 2.674271  | -1.958726 |
| 32               | 1                | 0              | 4.461559                | -0.115697 | 0.123396  |
| 33               | 8                | 0              | 5.197657                | 0.411783  | -0.252409 |



|    |   |   |           |           |           |
|----|---|---|-----------|-----------|-----------|
| 34 | 1 | 0 | 4.810220  | 1.291044  | -0.448033 |
| 35 | 1 | 0 | 5.290315  | -1.165324 | 2.177022  |
| 36 | 8 | 0 | 6.184676  | -0.781410 | 2.210176  |
| 37 | 1 | 0 | 6.185596  | -0.205535 | 1.419146  |
| 38 | 1 | 0 | -4.274930 | -1.039399 | -3.113699 |
| 39 | 1 | 0 | -4.933201 | -0.978983 | -1.463636 |
| 40 | 1 | 0 | -5.273840 | 0.331329  | -2.606186 |
| 41 | 6 | 0 | 1.124074  | -3.248823 | -0.915527 |
| 42 | 6 | 0 | 2.223585  | -2.867162 | -1.691910 |
| 43 | 1 | 0 | 1.295509  | 0.345711  | -2.347925 |
| 44 | 1 | 0 | 3.142892  | -1.262919 | -2.803739 |
| 45 | 1 | 0 | -0.739969 | -2.643756 | -0.035598 |
| 46 | 1 | 0 | 1.062470  | -4.253053 | -0.504570 |
| 47 | 1 | 0 | 3.024928  | -3.574142 | -1.892147 |
| 48 | 1 | 0 | -1.735124 | 2.691809  | -0.887553 |
| 49 | 8 | 0 | -2.216245 | 3.469722  | -0.512301 |
| 50 | 1 | 0 | -1.508000 | 4.070530  | -0.190125 |
| 51 | 1 | 0 | -2.736641 | 2.683286  | 0.923791  |
| 52 | 8 | 0 | -2.875280 | 2.082331  | 1.710646  |
| 53 | 1 | 0 | -2.548350 | 2.575128  | 2.477613  |
| 54 | 1 | 0 | -2.542819 | -3.666458 | 1.521796  |
| 55 | 8 | 0 | -2.270595 | -4.610605 | 1.622730  |
| 56 | 1 | 0 | -2.329997 | -4.786020 | 2.572826  |
| 57 | 1 | 0 | -4.308130 | -0.730310 | 2.106990  |
| 58 | 8 | 0 | -4.864399 | 0.032962  | 2.363199  |
| 59 | 1 | 0 | -4.312488 | 0.806807  | 2.137732  |
| 60 | 1 | 0 | -2.098434 | -1.324197 | -2.028092 |

-----  
SCF Done: E(RB+HF-LYP) = -1472.74204120 A.U. after 1 cycles

Conv = 0.2594D-08 -V/T = 2.0093

S\*\*2 = 0.0000

Zero-point correction= 0.500557 (a.u.)

Thermal correction to Energy= 0.543788

Thermal correction to Enthalpy= 0.544732

Thermal correction to Gibbs Free Energy= 0.418220

Sum of electronic and zero-point Energies= -1472.241484

Sum of electronic and thermal Energies= -1472.198253

Sum of electronic and thermal Enthalpies= -1472.197309

Sum of electronic and thermal Free Energies= -1472.323821

n=16 TS

N-ethyl benzamide + HO-(H2O)16 TS1, TS1(am)

tuka02aa.chk Stoichiometry:C9H44NO18(1-)

Standard orientation:

-----

| Center<br>Number | Atomic<br>Number | Atomic<br>Type | Coordinates (Angstroms) |           |           |
|------------------|------------------|----------------|-------------------------|-----------|-----------|
|                  |                  |                | X                       | Y         | Z         |
| 1                | 6                | 0              | -0.470652               | 2.399800  | -0.844394 |
| 2                | 6                | 0              | -0.180315               | 1.366931  | 0.254620  |
| 3                | 8                | 0              | -1.118661               | 0.470879  | 0.459457  |
| 4                | 7                | 0              | 0.342700                | 2.010664  | 1.397317  |
| 5                | 6                | 0              | 0.645579                | 1.245170  | 2.603188  |
| 6                | 6                | 0              | -1.799864               | 2.635945  | -1.211927 |
| 7                | 6                | 0              | -2.113841               | 3.598584  | -2.173143 |
| 8                | 6                | 0              | 0.540684                | 3.151935  | -1.458527 |
| 9                | 1                | 0              | 1.076941                | 2.683243  | 1.182820  |
| 10               | 6                | 0              | 0.885925                | 2.186439  | 3.783055  |
| 11               | 1                | 0              | -0.202787               | 0.591747  | 2.814586  |
| 12               | 1                | 0              | 1.528264                | 0.597069  | 2.466522  |
| 13               | 8                | 0              | 1.157664                | 0.509965  | -0.411976 |
| 14               | 1                | 0              | 0.896889                | 0.227086  | -1.314410 |
| 15               | 1                | 0              | 1.587771                | -0.852260 | 0.345443  |
| 16               | 8                | 0              | 1.952299                | -1.713037 | 0.748674  |
| 17               | 1                | 0              | 2.700652                | -1.434461 | 1.313807  |
| 18               | 1                | 0              | 2.706877                | -2.407177 | -0.567744 |
| 19               | 8                | 0              | 3.249789                | -2.785737 | -1.325315 |
| 20               | 1                | 0              | 3.390337                | -2.037032 | -1.927494 |
| 21               | 1                | 0              | 4.767183                | -3.037333 | -0.478314 |
| 22               | 8                | 0              | 5.544084                | -3.023980 | 0.142972  |
| 23               | 1                | 0              | 5.564892                | -3.901335 | 0.552826  |
| 24               | 1                | 0              | 1.612379                | -3.375996 | -2.394466 |
| 25               | 8                | 0              | 0.918694                | -3.204272 | -3.058986 |
| 26               | 1                | 0              | 0.050873                | -3.504101 | -2.664685 |
| 27               | 1                | 0              | 0.661174                | -1.532679 | -3.126138 |
| 28               | 8                | 0              | 0.461399                | -0.551175 | -3.066459 |
| 29               | 1                | 0              | 0.752093                | -0.153017 | -3.899660 |
| 30               | 1                | 0              | 5.065508                | -1.649753 | 1.162312  |
| 31               | 8                | 0              | 4.574746                | -0.895313 | 1.578999  |
| 32               | 1                | 0              | 5.059210                | -0.636911 | 2.376590  |
| 33               | 1                | 0              | -1.776876               | -0.345121 | -0.967672 |
| 34               | 8                | 0              | -2.108694               | -0.773240 | -1.803528 |
| 35               | 1                | 0              | -1.432968               | -0.526168 | -2.465828 |
| 36               | 1                | 0              | -1.815175               | -2.628230 | -2.039072 |
| 37               | 8                | 0              | -1.576407               | -3.579154 | -2.121011 |
| 38               | 1                | 0              | -1.869970               | -3.937887 | -1.248433 |
| 39               | 1                | 0              | -3.831575               | -1.515954 | -1.181114 |
| 40               | 8                | 0              | -4.464323               | -2.010375 | -0.624051 |
| 41               | 1                | 0              | -4.860708               | -1.346189 | -0.014687 |
| 42               | 1                | 0              | -0.847662               | -1.064812 | 1.165701  |
| 43               | 8                | 0              | -0.733012               | -1.960657 | 1.595774  |

|    |   |   |           |           |           |
|----|---|---|-----------|-----------|-----------|
| 44 | 1 | 0 | 0.223355  | -2.144736 | 1.488287  |
| 45 | 1 | 0 | -1.656867 | -1.836059 | 3.101483  |
| 46 | 8 | 0 | -2.343048 | -1.621517 | 3.782176  |
| 47 | 1 | 0 | -3.046979 | -2.270386 | 3.628954  |
| 48 | 1 | 0 | -1.944807 | -3.214478 | 0.852215  |
| 49 | 8 | 0 | -2.601781 | -3.826397 | 0.454936  |
| 50 | 1 | 0 | -3.353363 | -3.247451 | 0.179614  |
| 51 | 1 | 0 | 2.816465  | 1.024139  | -0.349095 |
| 52 | 8 | 0 | 3.769296  | 1.284433  | -0.214281 |
| 53 | 1 | 0 | 4.141875  | 0.590024  | 0.364135  |
| 54 | 1 | 0 | 3.527289  | 2.751943  | 0.736901  |
| 55 | 8 | 0 | 3.220396  | 3.527803  | 1.273584  |
| 56 | 1 | 0 | 3.423512  | 4.310456  | 0.741796  |
| 57 | 1 | 0 | -2.912549 | -0.008539 | 2.964230  |
| 58 | 8 | 0 | -3.161896 | 0.718587  | 2.350330  |
| 59 | 1 | 0 | -2.434337 | 0.745699  | 1.680167  |
| 60 | 1 | 0 | -4.616935 | 0.249836  | 1.616685  |
| 61 | 8 | 0 | -5.448266 | -0.072571 | 1.162537  |
| 62 | 1 | 0 | -5.847773 | 0.712152  | 0.760954  |
| 63 | 6 | 0 | 0.227862  | 4.115941  | -2.418266 |
| 64 | 6 | 0 | -1.101764 | 4.343406  | -2.779777 |
| 65 | 1 | 0 | -2.583159 | 2.052290  | -0.741269 |
| 66 | 1 | 0 | -3.152852 | 3.764280  | -2.447800 |
| 67 | 1 | 0 | 1.577652  | 2.972046  | -1.194422 |
| 68 | 1 | 0 | 1.026415  | 4.686340  | -2.887611 |
| 69 | 1 | 0 | -1.345600 | 5.092438  | -3.529757 |
| 70 | 1 | 0 | 1.720521  | 2.865998  | 3.576164  |
| 71 | 1 | 0 | -0.009187 | 2.785962  | 3.980437  |
| 72 | 1 | 0 | 1.125183  | 1.611812  | 4.686197  |

-----  
SCF Done: E(RB+HF-LYP) = -1778.52641035 A.U. after 1 cycles

Conv = 0.4358D-08 -V/T = 2.0093

S\*\*2 = 0.0000

Zero-point correction= 0.608558 (a.u.)  
Thermal correction to Energy= 0.659034  
Thermal correction to Enthalpy= 0.659978  
Thermal correction to Gibbs Free Energy= 0.521684  
Sum of electronic and zero-point Energies= -1777.917853  
Sum of electronic and thermal Energies= -1777.867376  
Sum of electronic and thermal Enthalpies= -1777.866432  
Sum of electronic and thermal Free Energies= -1778.004727

n=24 TS

N-ethyl benzamide and HO-(H2O)24 TS1(am)  
tuka02hh.chk Stoichiometry C9H60NO26(1-)

## Standard orientation:

| Center<br>Number | Atomic<br>Number | Atomic<br>Type | Coordinates (Angstroms) |           |           |
|------------------|------------------|----------------|-------------------------|-----------|-----------|
|                  |                  |                | X                       | Y         | Z         |
| 1                | 6                | 0              | 0.738258                | -2.509405 | -1.715082 |
| 2                | 6                | 0              | 0.594643                | -1.699462 | -0.426315 |
| 3                | 8                | 0              | 1.570108                | -0.877410 | -0.130417 |
| 4                | 7                | 0              | 0.103841                | -2.494532 | 0.616265  |
| 5                | 6                | 0              | -0.143069               | -1.947900 | 1.950257  |
| 6                | 6                | 0              | 2.007121                | -2.660926 | -2.284112 |
| 7                | 6                | 0              | 2.181726                | -3.427656 | -3.437988 |
| 8                | 6                | 0              | -0.355031               | -3.144732 | -2.321755 |
| 9                | 1                | 0              | -0.613125               | -3.145510 | 0.314979  |
| 10               | 6                | 0              | -0.407308               | -3.072920 | 2.947823  |
| 11               | 1                | 0              | 0.742337                | -1.388943 | 2.258055  |
| 12               | 1                | 0              | -0.988243               | -1.240491 | 1.943996  |
| 13               | 8                | 0              | -0.781220               | -0.650915 | -0.859048 |
| 14               | 1                | 0              | -0.576717               | -0.264679 | -1.736238 |
| 15               | 1                | 0              | -1.087316               | 0.620945  | 0.074125  |
| 16               | 8                | 0              | -1.361981               | 1.442795  | 0.614372  |
| 17               | 1                | 0              | -2.066870               | 1.135496  | 1.216455  |
| 18               | 1                | 0              | -2.149021               | 2.399507  | -0.557720 |
| 19               | 8                | 0              | -2.659783               | 2.965456  | -1.205951 |
| 20               | 1                | 0              | -2.955561               | 2.351807  | -1.898076 |
| 21               | 1                | 0              | -4.163798               | 3.237811  | -0.208607 |
| 22               | 8                | 0              | -4.914690               | 3.072197  | 0.412580  |
| 23               | 1                | 0              | -4.716337               | 3.565598  | 1.235706  |
| 24               | 1                | 0              | -1.097528               | 3.562183  | -2.261258 |
| 25               | 8                | 0              | -0.400074               | 3.461938  | -2.939667 |
| 26               | 1                | 0              | 0.458973                | 3.691662  | -2.506759 |
| 27               | 1                | 0              | -0.266921               | 1.801460  | -3.296016 |
| 28               | 8                | 0              | -0.130682               | 0.813414  | -3.391166 |
| 29               | 1                | 0              | -0.400437               | 0.576619  | -4.290773 |
| 30               | 1                | 0              | -4.392196               | 1.508496  | 1.126124  |
| 31               | 8                | 0              | -3.984127               | 0.812970  | 1.701040  |
| 32               | 1                | 0              | -4.741238               | 0.247948  | 1.987873  |
| 33               | 1                | 0              | 2.090146                | 0.178309  | -1.396954 |
| 34               | 8                | 0              | 2.385434                | 0.777147  | -2.138122 |
| 35               | 1                | 0              | 1.692183                | 0.665341  | -2.822586 |
| 36               | 1                | 0              | 2.235303                | 2.578685  | -1.938139 |
| 37               | 8                | 0              | 2.155527                | 3.562507  | -1.883697 |
| 38               | 1                | 0              | 2.468600                | 3.754987  | -0.974071 |
| 39               | 1                | 0              | 4.159941                | 1.175235  | -1.693977 |
| 40               | 8                | 0              | 4.890883                | 1.571106  | -1.172531 |
| 41               | 1                | 0              | 5.365097                | 0.810758  | -0.759734 |

|    |   |   |           |           |           |
|----|---|---|-----------|-----------|-----------|
| 42 | 1 | 0 | 1.360421  | 0.502979  | 0.857924  |
| 43 | 8 | 0 | 1.316054  | 1.328690  | 1.417338  |
| 44 | 1 | 0 | 0.380592  | 1.612765  | 1.327253  |
| 45 | 1 | 0 | 2.290103  | 0.859139  | 2.906188  |
| 46 | 8 | 0 | 3.059008  | 0.511615  | 3.413806  |
| 47 | 1 | 0 | 3.677692  | 1.278609  | 3.469776  |
| 48 | 1 | 0 | 2.636211  | 2.436175  | 0.869083  |
| 49 | 8 | 0 | 3.383472  | 3.044130  | 0.647894  |
| 50 | 1 | 0 | 3.992890  | 2.522253  | 0.063980  |
| 51 | 1 | 0 | -2.457100 | -1.037366 | -0.736288 |
| 52 | 8 | 0 | -3.432660 | -1.081385 | -0.520621 |
| 53 | 1 | 0 | -3.543076 | -0.463984 | 0.230614  |
| 54 | 1 | 0 | -4.803207 | -2.429323 | 0.022137  |
| 55 | 8 | 0 | -5.772283 | -2.544561 | 0.117012  |
| 56 | 1 | 0 | -6.093812 | -2.079037 | -0.695677 |
| 57 | 1 | 0 | 3.567158  | -0.719878 | 2.218929  |
| 58 | 8 | 0 | 3.697086  | -1.436974 | 1.544002  |
| 59 | 1 | 0 | 2.924033  | -1.350156 | 0.926139  |
| 60 | 1 | 0 | 5.140353  | -1.008059 | 0.634627  |
| 61 | 8 | 0 | 5.909995  | -0.701307 | 0.086764  |
| 62 | 1 | 0 | 6.170616  | -1.458297 | -0.457241 |
| 63 | 6 | 0 | -0.180496 | -3.915172 | -3.471377 |
| 64 | 6 | 0 | 1.089731  | -4.058341 | -4.034605 |
| 65 | 1 | 0 | 2.853572  | -2.168139 | -1.818501 |
| 66 | 1 | 0 | 3.174166  | -3.530627 | -3.869460 |
| 67 | 1 | 0 | -1.351327 | -3.014993 | -1.908966 |
| 68 | 1 | 0 | -1.040118 | -4.395826 | -3.931614 |
| 69 | 1 | 0 | 1.225097  | -4.654483 | -4.933617 |
| 70 | 1 | 0 | -1.299388 | -3.651537 | 2.670855  |
| 71 | 1 | 0 | 0.449876  | -3.751639 | 2.993534  |
| 72 | 1 | 0 | -0.566608 | -2.658265 | 3.948104  |
| 73 | 1 | 0 | -6.474175 | 1.996705  | -0.051040 |
| 74 | 8 | 0 | -7.047551 | 1.220321  | -0.209643 |
| 75 | 1 | 0 | -6.994931 | 0.684482  | 0.606675  |
| 76 | 1 | 0 | -3.876564 | 2.363983  | 2.951024  |
| 77 | 8 | 0 | -4.075970 | 3.311804  | 3.103375  |
| 78 | 1 | 0 | -3.289205 | 3.692816  | 3.520553  |
| 79 | 1 | 0 | 3.962371  | 3.980391  | -2.799560 |
| 80 | 8 | 0 | 4.914729  | 3.914056  | -3.004513 |
| 81 | 1 | 0 | 5.213318  | 3.181548  | -2.433777 |
| 82 | 1 | 0 | 2.527482  | -0.761728 | 4.831879  |
| 83 | 8 | 0 | 2.251030  | -1.556837 | 5.327895  |
| 84 | 1 | 0 | 2.546784  | -2.299258 | 4.763522  |
| 85 | 1 | 0 | 4.207175  | 3.049694  | 2.212505  |
| 86 | 8 | 0 | 4.551482  | 2.853297  | 3.123880  |
| 87 | 1 | 0 | 4.356822  | 3.635756  | 3.659389  |

|    |   |   |           |           |           |
|----|---|---|-----------|-----------|-----------|
| 88 | 1 | 0 | -6.168502 | -1.448665 | 1.307970  |
| 89 | 8 | 0 | -6.320697 | -0.660580 | 1.919117  |
| 90 | 1 | 0 | -6.798493 | -0.989496 | 2.695009  |
| 91 | 1 | 0 | -4.989381 | -0.663008 | -1.728971 |
| 92 | 8 | 0 | -5.941282 | -0.718363 | -1.951647 |
| 93 | 1 | 0 | -6.361277 | 0.040341  | -1.484060 |
| 94 | 1 | 0 | 3.469268  | -2.857466 | 2.661140  |
| 95 | 8 | 0 | 3.346017  | -3.495274 | 3.405449  |
| 96 | 1 | 0 | 4.240946  | -3.707518 | 3.708641  |

-----  
SCF Done: E(RB+HF-LYP) = -2390.06356594 A.U. after 1 cycles

Conv = 0.5806D-08 -V/T = 2.0093

S\*\*2 = 0.0000

Zero-point correction= 0.816166 (a.u.)  
Thermal correction to Energy= 0.885905  
Thermal correction to Enthalpy= 0.886849  
Thermal correction to Gibbs Free Energy= 0.706041  
Sum of electronic and zero-point Energies= -2389.247400  
Sum of electronic and thermal Energies= -2389.177661  
Sum of electronic and thermal Enthalpies= -2389.176717  
Sum of electronic and thermal Free Energies= -2389.357525

n=32 TS

N-ethyl benzamide and HO-(H2O)32 TS1(am)

tuka02ww.chk Stoichiometry: C9H76NO34(1-)

Standard orientation:

-----

| Center<br>Number | Atomic<br>Number | Atomic<br>Type | Coordinates (Angstroms) |           |           |
|------------------|------------------|----------------|-------------------------|-----------|-----------|
|                  |                  |                | X                       | Y         | Z         |
| 1                | 6                | 0              | -0.833024               | -0.878535 | 2.940360  |
| 2                | 6                | 0              | -0.976524               | -1.087997 | 1.431556  |
| 3                | 8                | 0              | -1.844492               | -0.320763 | 0.810826  |
| 4                | 7                | 0              | -1.027926               | -2.458438 | 1.128574  |
| 5                | 6                | 0              | -1.234583               | -2.946187 | -0.233602 |
| 6                | 6                | 0              | -1.888653               | -0.288664 | 3.643804  |
| 7                | 6                | 0              | -1.816955               | -0.127597 | 5.028610  |
| 8                | 6                | 0              | 0.293802                | -1.314104 | 3.651610  |
| 9                | 1                | 0              | -0.360418               | -3.007762 | 1.658779  |
| 10               | 6                | 0              | -1.432565               | -4.460543 | -0.229213 |
| 11               | 1                | 0              | -2.128723               | -2.462462 | -0.632956 |
| 12               | 1                | 0              | -0.395952               | -2.678488 | -0.898026 |
| 13               | 8                | 0              | 0.585530                | -0.560251 | 0.857661  |
| 14               | 1                | 0              | 0.687228                | 0.366715  | 1.177956  |
| 15               | 1                | 0              | 0.781550                | -0.396100 | -0.716540 |

-----

|    |   |   |           |           |           |
|----|---|---|-----------|-----------|-----------|
| 16 | 8 | 0 | 1.012333  | -0.188019 | -1.690256 |
| 17 | 1 | 0 | 1.488497  | -0.962872 | -2.031600 |
| 18 | 1 | 0 | 2.173747  | 1.076515  | -1.357837 |
| 19 | 8 | 0 | 2.879813  | 1.757760  | -1.215869 |
| 20 | 1 | 0 | 3.155433  | 1.711500  | -0.261194 |
| 21 | 1 | 0 | 4.181737  | 1.274257  | -2.085151 |
| 22 | 8 | 0 | 5.001999  | 0.856213  | -2.491266 |
| 23 | 1 | 0 | 4.796508  | 0.643921  | -3.427166 |
| 24 | 1 | 0 | 1.889755  | 3.353952  | -0.937201 |
| 25 | 8 | 0 | 1.559155  | 4.060430  | -0.343432 |
| 26 | 1 | 0 | 0.642448  | 4.275653  | -0.637028 |
| 27 | 1 | 0 | 1.130128  | 2.895389  | 1.049311  |
| 28 | 8 | 0 | 1.010941  | 2.212414  | 1.752955  |
| 29 | 1 | 0 | 1.929729  | 2.085480  | 2.066869  |
| 30 | 1 | 0 | 4.237327  | -0.868759 | -2.032396 |
| 31 | 8 | 0 | 3.808102  | -1.752528 | -2.073510 |
| 32 | 1 | 0 | 4.544060  | -2.379892 | -1.882180 |
| 33 | 1 | 0 | -1.791160 | 1.387047  | 1.166166  |
| 34 | 8 | 0 | -1.763594 | 2.361171  | 1.378762  |
| 35 | 1 | 0 | -0.962447 | 2.452428  | 1.932596  |
| 36 | 1 | 0 | -1.380459 | 3.553434  | 0.024200  |
| 37 | 8 | 0 | -1.201508 | 4.218928  | -0.683957 |
| 38 | 1 | 0 | -1.767892 | 3.916208  | -1.422358 |
| 39 | 1 | 0 | -3.511901 | 2.979703  | 1.123112  |
| 40 | 8 | 0 | -4.274695 | 3.239775  | 0.561274  |
| 41 | 1 | 0 | -5.031646 | 2.671021  | 0.829120  |
| 42 | 1 | 0 | -1.739802 | 0.024083  | -0.834330 |
| 43 | 8 | 0 | -1.755243 | 0.297295  | -1.799503 |
| 44 | 1 | 0 | -0.818586 | 0.216757  | -2.077436 |
| 45 | 1 | 0 | -3.120965 | -0.633193 | -2.546260 |
| 46 | 8 | 0 | -4.056248 | -0.935281 | -2.637458 |
| 47 | 1 | 0 | -4.525561 | -0.186380 | -3.066451 |
| 48 | 1 | 0 | -2.707263 | 1.852631  | -1.853296 |
| 49 | 8 | 0 | -3.288370 | 2.644615  | -1.958950 |
| 50 | 1 | 0 | -3.691915 | 2.824536  | -1.068359 |
| 51 | 1 | 0 | 2.081331  | -1.351721 | 0.897169  |
| 52 | 8 | 0 | 2.985675  | -1.762596 | 0.736632  |
| 53 | 1 | 0 | 3.086982  | -1.805028 | -0.237245 |
| 54 | 1 | 0 | 4.229409  | -3.008362 | 1.475174  |
| 55 | 8 | 0 | 5.183298  | -3.193659 | 1.631927  |
| 56 | 1 | 0 | 5.508055  | -2.328094 | 1.968573  |
| 57 | 1 | 0 | -4.330662 | -0.803808 | -0.823854 |
| 58 | 8 | 0 | -4.454849 | -0.814606 | 0.155151  |
| 59 | 1 | 0 | -3.538833 | -0.761502 | 0.534096  |
| 60 | 1 | 0 | -5.485750 | 0.501971  | 0.706425  |
| 61 | 8 | 0 | -6.149928 | 1.213549  | 0.897622  |

|     |   |   |           |           |           |
|-----|---|---|-----------|-----------|-----------|
| 62  | 1 | 0 | -6.850617 | 0.767090  | 1.424156  |
| 63  | 6 | 0 | 0.364285  | -1.157093 | 5.035979  |
| 64  | 6 | 0 | -0.691085 | -0.561002 | 5.729209  |
| 65  | 1 | 0 | -2.765088 | 0.044819  | 3.099111  |
| 66  | 1 | 0 | -2.644493 | 0.337546  | 5.557798  |
| 67  | 1 | 0 | 1.130467  | -1.755920 | 3.118141  |
| 68  | 1 | 0 | 1.250126  | -1.490841 | 5.570496  |
| 69  | 1 | 0 | -0.633398 | -0.431941 | 6.807043  |
| 70  | 1 | 0 | -0.529197 | -4.979778 | 0.119586  |
| 71  | 1 | 0 | -2.261733 | -4.734769 | 0.430912  |
| 72  | 1 | 0 | -1.672556 | -4.825538 | -1.232502 |
| 73  | 1 | 0 | 6.255670  | 0.130455  | -1.424705 |
| 74  | 8 | 0 | 6.840452  | -0.264038 | -0.735530 |
| 75  | 1 | 0 | 6.862922  | -1.228007 | -0.922534 |
| 76  | 1 | 0 | 3.816914  | -1.304763 | -4.024203 |
| 77  | 8 | 0 | 4.106392  | -0.656216 | -4.699529 |
| 78  | 1 | 0 | 3.355493  | -0.522909 | -5.296640 |
| 79  | 1 | 0 | -2.539030 | 5.680379  | -0.060437 |
| 80  | 8 | 0 | -3.396398 | 6.052913  | 0.219823  |
| 81  | 1 | 0 | -3.934537 | 5.257925  | 0.392915  |
| 82  | 1 | 0 | -4.997285 | -2.585313 | -2.735552 |
| 83  | 8 | 0 | -5.603348 | -3.347395 | -2.624337 |
| 84  | 1 | 0 | -6.198690 | -3.079335 | -1.893847 |
| 85  | 1 | 0 | -4.561407 | 2.038449  | -2.909071 |
| 86  | 8 | 0 | -5.251271 | 1.495495  | -3.394293 |
| 87  | 1 | 0 | -5.386335 | 1.916259  | -4.256019 |
| 88  | 1 | 0 | 5.756673  | -3.047089 | -0.065667 |
| 89  | 8 | 0 | 6.087658  | -2.981643 | -0.997819 |
| 90  | 1 | 0 | 6.549369  | -3.832248 | -1.113752 |
| 91  | 1 | 0 | 4.407829  | -0.689625 | 1.293108  |
| 92  | 8 | 0 | 5.274157  | -0.379941 | 1.649285  |
| 93  | 1 | 0 | 5.852303  | -0.253742 | 0.862897  |
| 94  | 1 | 0 | -6.077827 | -1.790753 | -0.053728 |
| 95  | 8 | 0 | -6.972609 | -1.922988 | -0.434951 |
| 96  | 1 | 0 | -7.114508 | -1.115153 | -0.992178 |
| 97  | 1 | 0 | 6.168764  | -4.784550 | 1.190766  |
| 98  | 8 | 0 | 6.701957  | -5.308309 | 0.557642  |
| 99  | 1 | 0 | 6.882344  | -6.160174 | 0.979228  |
| 100 | 1 | 0 | 4.477517  | 1.386155  | 1.687708  |
| 101 | 8 | 0 | 3.759602  | 1.987918  | 1.399755  |
| 102 | 1 | 0 | 4.134264  | 2.897303  | 1.234680  |
| 103 | 1 | 0 | -6.984504 | 1.030619  | -0.769107 |
| 104 | 8 | 0 | -7.316293 | 0.593695  | -1.586738 |
| 105 | 1 | 0 | -6.728247 | 0.919735  | -2.298257 |
| 106 | 1 | 0 | 5.841696  | 2.781386  | -2.011199 |
| 107 | 8 | 0 | 6.198535  | 3.523438  | -1.490234 |



|     |   |   |           |           |           |
|-----|---|---|-----------|-----------|-----------|
| 108 | 1 | 0 | 6.993535  | 3.147901  | -1.051096 |
| 109 | 1 | 0 | 3.507718  | 4.654927  | 0.148984  |
| 110 | 8 | 0 | 4.395095  | 4.446738  | 0.501990  |
| 111 | 1 | 0 | 4.978543  | 4.250048  | -0.267001 |
| 112 | 1 | 0 | 8.022422  | 1.126947  | -0.462587 |
| 113 | 8 | 0 | 8.382562  | 2.039939  | -0.406176 |
| 114 | 1 | 0 | 9.186833  | 2.045694  | -0.945147 |
| 115 | 1 | 0 | -4.617525 | -4.863445 | -2.487079 |
| 116 | 8 | 0 | -4.080019 | -5.689465 | -2.547463 |
| 117 | 1 | 0 | -4.458454 | -6.163991 | -3.301517 |
| 118 | 1 | 0 | -7.867566 | -1.223989 | 1.032024  |
| 119 | 8 | 0 | -8.153797 | -0.610321 | 1.753285  |
| 120 | 1 | 0 | -9.059864 | -0.353283 | 1.527145  |

-----  
SCF Done: E(RB+HF-LYP) = -3001.59879182 A.U. after 1 cycles

Conv = 0.4028D-08 -V/T = 2.0093

S\*\*2 = 0.0000

Zero-point correction= 1.023828 (a.u.)

Thermal correction to Energy= 1.112687

Thermal correction to Enthalpy= 1.113631

Thermal correction to Gibbs Free Energy= 0.891095

Sum of electronic and zero-point Energies= -3000.574964

Sum of electronic and thermal Energies= -3000.486105

Sum of electronic and thermal Enthalpies= -3000.485160

Sum of electronic and thermal Free Energies= -3000.707697

=====

[3] Geometries of the n=16 ester hydrolysis in Figure 3

(3-1) reactant-like complex (precursor)

zuka02aa.for.g09.chk Stoichiometry C9H43O19(1-)

Standard orientation:

| Center<br>Number | Atomic<br>Number | Atomic<br>Type | Coordinates (Angstroms) |           |           |
|------------------|------------------|----------------|-------------------------|-----------|-----------|
|                  |                  |                | X                       | Y         | Z         |
| 1                | 6                | 0              | -3.459320               | -1.804560 | 0.269734  |
| 2                | 6                | 0              | -2.283186               | -1.463164 | -0.575967 |
| 3                | 8                | 0              | -1.787277               | -0.333465 | -0.624450 |
| 4                | 8                | 0              | -1.825966               | -2.489807 | -1.284015 |
| 5                | 6                | 0              | -0.640002               | -2.277620 | -2.118665 |
| 6                | 6                | 0              | -3.927062               | -0.854667 | 1.189895  |
| 7                | 6                | 0              | -5.027542               | -1.147187 | 1.992776  |
| 8                | 6                | 0              | -4.101807               | -3.047369 | 0.162822  |
| 9                | 6                | 0              | -0.415874               | -3.552816 | -2.904888 |
| 10               | 1                | 0              | -0.833317               | -1.419907 | -2.768374 |
| 11               | 1                | 0              | 0.202810                | -2.057319 | -1.456905 |
| 12               | 8                | 0              | 2.076165                | -1.796150 | -0.184243 |
| 13               | 1                | 0              | 1.681141                | -1.360514 | 0.602432  |
| 14               | 1                | 0              | 2.268714                | -1.038424 | -0.827995 |
| 15               | 8                | 0              | 2.614487                | 0.294854  | -1.742392 |
| 16               | 1                | 0              | 2.896190                | 0.073593  | -2.642200 |
| 17               | 1                | 0              | 3.836438                | 0.681503  | -0.817596 |
| 18               | 8                | 0              | 4.588474                | 0.797383  | -0.126145 |
| 19               | 1                | 0              | 4.608672                | -0.074901 | 0.335457  |
| 20               | 1                | 0              | 6.065693                | 0.619315  | -0.936853 |
| 21               | 8                | 0              | 6.912396                | 0.304427  | -1.377402 |
| 22               | 1                | 0              | 6.773283                | 0.435874  | -2.326643 |
| 23               | 1                | 0              | 3.665902                | 1.567905  | 1.251537  |
| 24               | 8                | 0              | 3.135639                | 1.647849  | 2.081604  |
| 25               | 1                | 0              | 2.541874                | 2.433663  | 1.985131  |
| 26               | 1                | 0              | 1.921115                | 0.395666  | 2.055002  |
| 27               | 8                | 0              | 1.303490                | -0.370551 | 2.218764  |
| 28               | 1                | 0              | 1.812276                | -0.865812 | 2.895851  |
| 29               | 1                | 0              | 6.976068                | -1.388456 | -0.864211 |
| 30               | 8                | 0              | 6.918778                | -2.303198 | -0.482413 |
| 31               | 1                | 0              | 7.660959                | -2.367700 | 0.136419  |
| 32               | 1                | 0              | -1.130036               | 0.805365  | 1.006731  |
| 33               | 8                | 0              | -0.979457               | 1.136625  | 1.910816  |
| 34               | 1                | 0              | -0.273683               | 0.535819  | 2.254802  |
| 35               | 1                | 0              | 0.344328                | 2.767015  | 2.031655  |
| 36               | 8                | 0              | 1.044765                | 3.436797  | 1.905043  |
| 37               | 1                | 0              | 0.801114                | 3.838531  | 1.040065  |

|    |   |   |           |           |           |
|----|---|---|-----------|-----------|-----------|
| 38 | 1 | 0 | -2.118464 | 2.779205  | 1.681139  |
| 39 | 8 | 0 | -2.431985 | 3.559127  | 1.186870  |
| 40 | 1 | 0 | -3.300531 | 3.322741  | 0.792255  |
| 41 | 1 | 0 | -0.240093 | 0.748692  | -1.446701 |
| 42 | 8 | 0 | 0.328011  | 1.461773  | -1.785521 |
| 43 | 1 | 0 | 1.284443  | 1.055652  | -1.798075 |
| 44 | 1 | 0 | -0.618570 | 2.515831  | -2.988439 |
| 45 | 8 | 0 | -1.304715 | 3.191459  | -3.202563 |
| 46 | 1 | 0 | -1.131196 | 3.863182  | -2.512426 |
| 47 | 1 | 0 | -0.003139 | 3.038724  | -0.849627 |
| 48 | 8 | 0 | -0.260908 | 3.945570  | -0.559642 |
| 49 | 1 | 0 | -1.086414 | 3.845516  | -0.027336 |
| 50 | 1 | 0 | 3.704684  | -2.012179 | 0.503529  |
| 51 | 8 | 0 | 4.550041  | -1.808395 | 0.987915  |
| 52 | 1 | 0 | 5.303203  | -2.182728 | 0.478896  |
| 53 | 1 | 0 | 4.149656  | -1.327511 | 2.777341  |
| 54 | 8 | 0 | 3.744257  | -0.904473 | 3.565611  |
| 55 | 1 | 0 | 3.803764  | 0.051118  | 3.374802  |
| 56 | 1 | 0 | -2.725928 | 2.260990  | -2.665366 |
| 57 | 8 | 0 | -3.381013 | 1.641465  | -2.244724 |
| 58 | 1 | 0 | -2.831540 | 1.019213  | -1.734709 |
| 59 | 1 | 0 | -4.312069 | 2.461639  | -1.044899 |
| 60 | 8 | 0 | -4.747661 | 2.891569  | -0.258847 |
| 61 | 1 | 0 | -5.491484 | 2.321255  | -0.019267 |
| 62 | 6 | 0 | -5.206572 | -3.330135 | 0.962581  |
| 63 | 6 | 0 | -5.670450 | -2.381788 | 1.877857  |
| 64 | 1 | 0 | -3.412622 | 0.094633  | 1.286780  |
| 65 | 1 | 0 | -5.376935 | -0.412724 | 2.712802  |
| 66 | 1 | 0 | -3.733656 | -3.779869 | -0.546490 |
| 67 | 1 | 0 | -5.704504 | -4.291852 | 0.873961  |
| 68 | 1 | 0 | -6.529595 | -2.607112 | 2.504558  |
| 69 | 1 | 0 | -0.243025 | -4.399383 | -2.232937 |
| 70 | 1 | 0 | -1.268672 | -3.782271 | -3.553311 |
| 71 | 1 | 0 | 0.473850  | -3.431009 | -3.531782 |

-----  
SCF Done: E(RB3LYP) = -1798.42467109 A.U. after 1 cycles

Convg = 0.2884D-08 -V/T = 2.0093

Zero-point correction= 0.596344 (a.u.)

Thermal correction to Energy= 0.647470

Thermal correction to Enthalpy= 0.648414

Thermal correction to Gibbs Free Energy= 0.506284

Sum of electronic and zero-point Energies= -1797.828327

Sum of electronic and thermal Energies= -1797.777202

Sum of electronic and thermal Enthalpies= -1797.776257

Sum of electronic and thermal Free Energies= -1797.918387

(3-2) TS1(es) which is also shown in n=16 of Figure 1

ethyl benzoate + HO-(H2O)16 TS1(es)

zuka02aa.chk Stoichiometry C9H43O19(1-)

Standard orientation:

| Center<br>Number | Atomic<br>Number | Atomic<br>Type | Coordinates (Angstroms) |           |           |
|------------------|------------------|----------------|-------------------------|-----------|-----------|
|                  |                  |                | X                       | Y         | Z         |
| 1                | 6                | 0              | -0.029063               | 2.670394  | -0.007977 |
| 2                | 6                | 0              | -0.333003               | 1.442850  | 0.812460  |
| 3                | 8                | 0              | -1.376670               | 0.754484  | 0.605280  |
| 4                | 8                | 0              | 0.171988                | 1.585091  | 2.066932  |
| 5                | 6                | 0              | -0.139275               | 0.572461  | 3.039007  |
| 6                | 6                | 0              | -1.002168               | 3.171408  | -0.877904 |
| 7                | 6                | 0              | -0.749097               | 4.321731  | -1.629854 |
| 8                | 6                | 0              | 1.198353                | 3.337491  | 0.111139  |
| 9                | 6                | 0              | 0.566257                | 0.950146  | 4.329589  |
| 10               | 1                | 0              | -1.223399               | 0.524903  | 3.180571  |
| 11               | 1                | 0              | 0.203927                | -0.397340 | 2.667420  |
| 12               | 8                | 0              | 1.112393                | 0.292708  | 0.071213  |
| 13               | 1                | 0              | 0.932669                | 0.320348  | -0.890057 |
| 14               | 1                | 0              | 1.114067                | -1.184518 | 0.519889  |
| 15               | 8                | 0              | 1.192987                | -2.180322 | 0.801716  |
| 16               | 1                | 0              | 1.845657                | -2.191722 | 1.527157  |
| 17               | 1                | 0              | 2.282543                | -2.529205 | -0.575781 |
| 18               | 8                | 0              | 3.048589                | -2.485507 | -1.207847 |
| 19               | 1                | 0              | 3.408064                | -1.583854 | -1.018809 |
| 20               | 1                | 0              | 4.170642                | -3.491734 | -0.329493 |
| 21               | 8                | 0              | 4.696286                | -3.933476 | 0.394713  |
| 22               | 1                | 0              | 4.341013                | -4.832240 | 0.461187  |
| 23               | 1                | 0              | 2.010705                | -2.321772 | -2.810826 |
| 24               | 8                | 0              | 1.402411                | -2.060926 | -3.535093 |
| 25               | 1                | 0              | 0.524611                | -2.466652 | -3.319601 |
| 26               | 1                | 0              | 1.016843                | -0.447951 | -3.233872 |
| 27               | 8                | 0              | 0.682451                | 0.445165  | -2.919219 |
| 28               | 1                | 0              | 1.211674                | 1.125550  | -3.359063 |
| 29               | 1                | 0              | 4.222380                | -2.794697 | 1.660728  |
| 30               | 8                | 0              | 3.807768                | -2.051158 | 2.172094  |
| 31               | 1                | 0              | 4.304338                | -1.966378 | 2.999044  |
| 32               | 1                | 0              | -1.780425               | 0.266555  | -1.176166 |
| 33               | 8                | 0              | -1.957116               | 0.073115  | -2.124303 |
| 34               | 1                | 0              | -1.149027               | 0.394229  | -2.581711 |
| 35               | 1                | 0              | -1.491720               | -1.730337 | -2.649809 |
| 36               | 8                | 0              | -1.210496               | -2.637471 | -2.894836 |
| 37               | 1                | 0              | -1.749771               | -3.194595 | -2.285945 |
| 38               | 1                | 0              | -3.752133               | -0.711160 | -2.126512 |

|    |   |   |           |           |           |
|----|---|---|-----------|-----------|-----------|
| 39 | 8 | 0 | -4.520913 | -1.258597 | -1.870622 |
| 40 | 1 | 0 | -5.010333 | -0.733016 | -1.199075 |
| 41 | 1 | 0 | -1.479635 | -1.082881 | 0.892639  |
| 42 | 8 | 0 | -1.537605 | -2.041667 | 1.114426  |
| 43 | 1 | 0 | -0.594979 | -2.336076 | 1.095771  |
| 44 | 1 | 0 | -2.722830 | -2.085136 | 2.424479  |
| 45 | 8 | 0 | -3.492898 | -1.889416 | 3.015905  |
| 46 | 1 | 0 | -4.215209 | -2.436026 | 2.670742  |
| 47 | 1 | 0 | -2.530443 | -3.008100 | -0.197370 |
| 48 | 8 | 0 | -3.023201 | -3.456601 | -0.916608 |
| 49 | 1 | 0 | -3.672187 | -2.781392 | -1.227886 |
| 50 | 1 | 0 | 2.757130  | 0.240645  | 0.083527  |
| 51 | 8 | 0 | 3.733753  | -0.035893 | 0.041959  |
| 52 | 1 | 0 | 3.882110  | -0.538171 | 0.868944  |
| 53 | 1 | 0 | 4.855338  | 1.390809  | -0.064081 |
| 54 | 8 | 0 | 5.487433  | 2.140200  | -0.180177 |
| 55 | 1 | 0 | 5.722263  | 2.112831  | -1.118899 |
| 56 | 1 | 0 | -3.796555 | -0.141584 | 2.455045  |
| 57 | 8 | 0 | -3.878579 | 0.723874  | 1.990145  |
| 58 | 1 | 0 | -3.022635 | 0.840248  | 1.523462  |
| 59 | 1 | 0 | -5.125077 | 0.487778  | 0.813224  |
| 60 | 8 | 0 | -5.812308 | 0.299351  | 0.117364  |
| 61 | 1 | 0 | -6.118306 | 1.164679  | -0.190050 |
| 62 | 6 | 0 | 1.449119  | 4.483124  | -0.640012 |
| 63 | 6 | 0 | 0.475828  | 4.978745  | -1.514168 |
| 64 | 1 | 0 | -1.953836 | 2.658323  | -0.964538 |
| 65 | 1 | 0 | -1.512870 | 4.701300  | -2.304012 |
| 66 | 1 | 0 | 1.955900  | 2.940920  | 0.777266  |
| 67 | 1 | 0 | 2.408934  | 4.984545  | -0.546915 |
| 68 | 1 | 0 | 0.674130  | 5.872185  | -2.101826 |
| 69 | 1 | 0 | 1.650787  | 0.994343  | 4.183860  |
| 70 | 1 | 0 | 0.226743  | 1.928073  | 4.686954  |
| 71 | 1 | 0 | 0.347041  | 0.204541  | 5.102382  |

-----  
SCF Done: E(RB+HF-LYP) = -1798.39889531 A.U. after 1 cycles

Convrg = 0.2155D-08 -V/T = 2.0093

S\*\*2 = 0.0000

Zero-point correction= 0.595360 (a.u.)  
Thermal correction to Energy= 0.646200  
Thermal correction to Enthalpy= 0.647145  
Thermal correction to Gibbs Free Energy= 0.506737  
Sum of electronic and zero-point Energies= -1797.803536  
Sum of electronic and thermal Energies= -1797.752695  
Sum of electronic and thermal Enthalpies= -1797.751751  
Sum of electronic and thermal Free Energies= -1797.892158

(3-3) Anionic tetrahedral intermediate, Ph-C(-O-)(OH)OEt and  
(H<sub>2</sub>O)<sub>16</sub>, Int1(es)

zukaphxx.rev.chk Stoichiometry C<sub>9</sub>H<sub>4</sub>3O<sub>19</sub>(1-)

Standard orientation:

| Center<br>Number | Atomic<br>Number | Atomic<br>Type | Coordinates (Angstroms) |           |           |
|------------------|------------------|----------------|-------------------------|-----------|-----------|
|                  |                  |                | X                       | Y         | Z         |
| 1                | 6                | 0              | -3.111915               | -0.725212 | -0.378531 |
| 2                | 6                | 0              | -1.576014               | -0.782626 | -0.487489 |
| 3                | 8                | 0              | -0.945002               | 0.206886  | 0.156154  |
| 4                | 8                | 0              | -1.221740               | -0.830325 | -1.885831 |
| 5                | 1                | 0              | -0.732841               | -0.010069 | -2.113484 |
| 6                | 6                | 0              | -3.730511               | 0.009293  | 0.637318  |
| 7                | 6                | 0              | -5.123175               | 0.034248  | 0.753237  |
| 8                | 6                | 0              | -3.913865               | -1.443990 | -1.275576 |
| 9                | 8                | 0              | -1.137670               | -2.111359 | -0.052893 |
| 10               | 6                | 0              | -1.322683               | -2.409897 | 1.328027  |
| 11               | 1                | 0              | -2.391551               | -2.375426 | 1.583352  |
| 12               | 6                | 0              | -0.757158               | -3.797001 | 1.594879  |
| 13               | 1                | 0              | -0.805651               | -1.665519 | 1.946612  |
| 14               | 1                | 0              | 0.675680                | 0.029075  | 0.058930  |
| 15               | 8                | 0              | 1.683714                | -0.060530 | 0.020282  |
| 16               | 1                | 0              | 2.021972                | 0.654192  | -0.572520 |
| 17               | 1                | 0              | 2.132218                | -1.496278 | -0.871309 |
| 18               | 8                | 0              | 2.558599                | -2.267743 | -1.332570 |
| 19               | 1                | 0              | 1.812192                | -2.685543 | -1.835752 |
| 20               | 1                | 0              | 3.998168                | -1.181151 | -1.971487 |
| 21               | 8                | 0              | 4.619630                | -0.422791 | -2.039773 |
| 22               | 1                | 0              | 5.035071                | -0.356754 | -1.150688 |
| 23               | 1                | 0              | 3.343172                | -1.835876 | 1.807950  |
| 24               | 8                | 0              | 3.279182                | -0.871825 | 2.023269  |
| 25               | 1                | 0              | 2.650025                | -0.513596 | 1.335196  |
| 26               | 1                | 0              | 2.248112                | -0.578918 | 3.432133  |
| 27               | 8                | 0              | 1.566646                | -0.327865 | 4.108210  |
| 28               | 1                | 0              | 2.018655                | 0.267892  | 4.723496  |
| 29               | 1                | 0              | 3.490891                | 0.963351  | -2.091341 |
| 30               | 8                | 0              | 2.752764                | 1.602867  | -1.910900 |
| 31               | 1                | 0              | 2.032721                | 1.412043  | -2.554532 |
| 32               | 1                | 0              | -0.600645               | 0.678743  | 1.837811  |
| 33               | 8                | 0              | -0.319804               | 1.179633  | 2.646924  |
| 34               | 1                | 0              | 0.265901                | 0.588558  | 3.174339  |
| 35               | 1                | 0              | 0.582157                | 2.629089  | 1.997402  |
| 36               | 8                | 0              | 0.718231                | 3.538923  | 1.630082  |
| 37               | 1                | 0              | 0.070180                | 4.065969  | 2.135594  |
| 38               | 1                | 0              | -1.632247               | 2.653029  | 2.992915  |

|    |   |   |           |           |           |
|----|---|---|-----------|-----------|-----------|
| 39 | 8 | 0 | -2.034693 | 3.511422  | 2.750960  |
| 40 | 1 | 0 | -2.241088 | 3.392711  | 1.801807  |
| 41 | 1 | 0 | -1.437233 | 1.885258  | -0.094453 |
| 42 | 8 | 0 | -1.513928 | 2.878780  | -0.079418 |
| 43 | 1 | 0 | -0.674611 | 3.154111  | 0.347674  |
| 44 | 1 | 0 | -1.011030 | 3.495581  | -1.734358 |
| 45 | 8 | 0 | -0.415272 | 3.715019  | -2.491448 |
| 46 | 1 | 0 | 0.410889  | 4.024272  | -2.044068 |
| 47 | 1 | 0 | 4.797175  | -0.320928 | 1.218549  |
| 48 | 8 | 0 | 5.569548  | -0.081045 | 0.646423  |
| 49 | 1 | 0 | 5.705553  | 0.868634  | 0.781461  |
| 50 | 1 | 0 | -0.166470 | -3.576720 | -1.595083 |
| 51 | 8 | 0 | 0.183463  | -3.184297 | -2.413004 |
| 52 | 1 | 0 | -0.286059 | -2.314198 | -2.390678 |
| 53 | 1 | 0 | 3.144510  | -3.142376 | 0.051664  |
| 54 | 8 | 0 | 3.491605  | -3.433606 | 0.939375  |
| 55 | 1 | 0 | 4.421265  | -3.661299 | 0.789917  |
| 56 | 1 | 0 | 0.109798  | 1.089196  | -4.134283 |
| 57 | 8 | 0 | 0.296835  | 1.258880  | -3.199005 |
| 58 | 1 | 0 | -0.019940 | 2.199291  | -3.010603 |
| 59 | 1 | 0 | 2.392829  | 3.327855  | -1.243030 |
| 60 | 8 | 0 | 1.919347  | 4.143427  | -0.971531 |
| 61 | 1 | 0 | 1.639781  | 3.991614  | -0.045836 |
| 62 | 6 | 0 | -5.303071 | -1.421313 | -1.161580 |
| 63 | 6 | 0 | -5.914145 | -0.680477 | -0.145641 |
| 64 | 1 | 0 | -3.116298 | 0.568798  | 1.334651  |
| 65 | 1 | 0 | -5.585249 | 0.617008  | 1.546450  |
| 66 | 1 | 0 | -3.438299 | -2.010193 | -2.069832 |
| 67 | 1 | 0 | -5.911614 | -1.978884 | -1.870326 |
| 68 | 1 | 0 | -6.998208 | -0.659450 | -0.059163 |
| 69 | 1 | 0 | -0.887902 | -4.059991 | 2.651217  |
| 70 | 1 | 0 | -1.271941 | -4.551369 | 0.987883  |
| 71 | 1 | 0 | 0.313544  | -3.835493 | 1.365509  |

-----  
SCF Done: E(RB+HF-LYP) = -1798.42108073 A.U. after 1 cycles

Convgt = 0.1330D-08 -V/T = 2.0093

S\*\*2 = 0.0000

Zero-point correction= 0.600051 (a.u.)  
Thermal correction to Energy= 0.649207  
Thermal correction to Enthalpy= 0.650151  
Thermal correction to Gibbs Free Energy= 0.515271  
Sum of electronic and zero-point Energies= -1797.821030  
Sum of electronic and thermal Energies= -1797.771874  
Sum of electronic and thermal Enthalpies= -1797.770929  
Sum of electronic and thermal Free Energies= -1797.905810

(3-4) TS2'(es),

formation of the neutral tetrahedral intermediate Int2'(es)

zuka07.g09.chk Stoichiometry C9H43O19(1-)

Standard orientation:

| -----  |        |        |                         |           |           |  |
|--------|--------|--------|-------------------------|-----------|-----------|--|
| Center | Atomic | Atomic | Coordinates (Angstroms) |           |           |  |
| Number | Number | Type   | X                       | Y         | Z         |  |
| -----  |        |        |                         |           |           |  |
| 1      | 6      | 0      | 2.555055                | -0.970578 | 0.235205  |  |
| 2      | 6      | 0      | 1.227882                | -0.783265 | -0.515696 |  |
| 3      | 8      | 0      | 0.413977                | 0.062830  | 0.228759  |  |
| 4      | 8      | 0      | 0.533823                | -2.024998 | -0.638932 |  |
| 5      | 6      | 0      | 1.178608                | -3.053926 | -1.418704 |  |
| 6      | 6      | 0      | 2.533033                | -1.351652 | 1.584195  |  |
| 7      | 6      | 0      | 3.722602                | -1.547373 | 2.283201  |  |
| 8      | 6      | 0      | 3.787924                | -0.805534 | -0.401950 |  |
| 9      | 6      | 0      | 0.246492                | -4.251973 | -1.486423 |  |
| 10     | 1      | 0      | 1.386978                | -2.665482 | -2.419955 |  |
| 11     | 1      | 0      | 2.131314                | -3.320039 | -0.942933 |  |
| 12     | 8      | 0      | 1.411337                | -0.316771 | -1.829095 |  |
| 13     | 1      | 0      | 1.761716                | 0.612026  | -1.835068 |  |
| 14     | 1      | 0      | -1.777450               | 1.599943  | -2.223302 |  |
| 15     | 8      | 0      | -1.598654               | 1.834067  | -3.161625 |  |
| 16     | 1      | 0      | -1.308499               | 0.977582  | -3.553117 |  |
| 17     | 1      | 0      | -0.298336               | 3.020613  | -3.147124 |  |
| 18     | 8      | 0      | 0.456511                | 3.648370  | -2.987828 |  |
| 19     | 1      | 0      | 0.171581                | 4.188643  | -2.205685 |  |
| 20     | 1      | 0      | 1.651193                | 2.803048  | -2.421183 |  |
| 21     | 8      | 0      | 2.395890                | 2.249507  | -1.979159 |  |
| 22     | 1      | 0      | 3.185936                | 2.370010  | -2.526220 |  |
| 23     | 1      | 0      | 1.103317                | 1.807659  | 0.598097  |  |
| 24     | 8      | 0      | 1.542555                | 2.682886  | 0.681264  |  |
| 25     | 1      | 0      | 2.139342                | 2.694342  | -0.095367 |  |
| 26     | 1      | 0      | 0.469941                | 4.204054  | -0.052908 |  |
| 27     | 8      | 0      | -0.126532               | 4.797058  | -0.554367 |  |
| 28     | 1      | 0      | -1.014932               | 4.514212  | -0.232836 |  |
| 29     | 1      | 0      | 0.481260                | 3.298046  | 2.254706  |  |
| 30     | 8      | 0      | -0.345120               | 3.408928  | 2.761229  |  |
| 31     | 1      | 0      | -0.321438               | 2.736296  | 3.478812  |  |
| 32     | 1      | 0      | -0.531131               | 0.223854  | -0.215418 |  |
| 33     | 8      | 0      | -1.945989               | 0.603759  | -0.564615 |  |
| 34     | 1      | 0      | -2.301052               | -0.123247 | -1.121016 |  |
| 35     | 1      | 0      | -2.613063               | 0.518277  | 0.451015  |  |
| 36     | 8      | 0      | -3.206903               | 0.419887  | 1.513819  |  |
| 37     | 1      | 0      | -3.491425               | 1.319428  | 1.743899  |  |
| 38     | 1      | 0      | -2.121959               | 2.568589  | 0.187768  |  |



|    |   |   |           |           |           |
|----|---|---|-----------|-----------|-----------|
| 39 | 8 | 0 | -2.224944 | 3.403341  | 0.682048  |
| 40 | 1 | 0 | -1.653992 | 3.322876  | 1.484156  |
| 41 | 1 | 0 | 0.020459  | -0.700075 | -3.102361 |
| 42 | 8 | 0 | -0.721635 | -0.789960 | -3.734211 |
| 43 | 1 | 0 | -1.427407 | -1.245495 | -3.228501 |
| 44 | 1 | 0 | -1.907334 | -0.118995 | 2.365362  |
| 45 | 8 | 0 | -1.023220 | -0.485633 | 2.694796  |
| 46 | 1 | 0 | -0.410858 | -0.269494 | 1.959577  |
| 47 | 1 | 0 | -0.577764 | 0.579331  | 3.999679  |
| 48 | 8 | 0 | -0.315440 | 1.298216  | 4.635315  |
| 49 | 1 | 0 | 0.551586  | 1.042681  | 4.981867  |
| 50 | 6 | 0 | 4.981095  | -0.997827 | 0.300207  |
| 51 | 6 | 0 | 4.952093  | -1.366669 | 1.644127  |
| 52 | 1 | 0 | 1.582287  | -1.504318 | 2.084773  |
| 53 | 1 | 0 | 3.688965  | -1.842870 | 3.328709  |
| 54 | 1 | 0 | 3.812189  | -0.530975 | -1.451080 |
| 55 | 1 | 0 | 5.932242  | -0.860503 | -0.208200 |
| 56 | 1 | 0 | 5.879714  | -1.516168 | 2.191067  |
| 57 | 1 | 0 | 0.044213  | -4.660405 | -0.491034 |
| 58 | 1 | 0 | -0.707030 | -3.976438 | -1.947911 |
| 59 | 1 | 0 | 0.708655  | -5.039093 | -2.093735 |
| 60 | 1 | 0 | -1.235267 | -2.283844 | 2.078360  |
| 61 | 8 | 0 | -1.161430 | -3.052670 | 1.470295  |
| 62 | 1 | 0 | -0.569271 | -2.719985 | 0.765066  |
| 63 | 1 | 0 | -4.453370 | -0.680269 | 1.440930  |
| 64 | 8 | 0 | -5.125998 | -1.426798 | 1.378582  |
| 65 | 1 | 0 | -5.304238 | -1.689564 | 2.293195  |
| 66 | 1 | 0 | -3.778062 | -1.408312 | -2.532918 |
| 67 | 8 | 0 | -2.927316 | -1.637004 | -2.129822 |
| 68 | 1 | 0 | -3.140646 | -2.276763 | -1.382669 |
| 69 | 1 | 0 | -4.172381 | -2.662534 | 0.468176  |
| 70 | 8 | 0 | -3.527711 | -3.211886 | -0.041134 |
| 71 | 1 | 0 | -2.720278 | -3.238879 | 0.527796  |

-----  
SCF Done: E(RB3LYP) = -1798.41015057 A.U. after 1 cycles

Conv = 0.2134D-08 -V/T = 2.0092

Zero-point correction= 0.594718 (a.u.)

Thermal correction to Energy= 0.642635

Thermal correction to Enthalpy= 0.643579

Thermal correction to Gibbs Free Energy= 0.512714

Sum of electronic and zero-point Energies= -1797.815432

Sum of electronic and thermal Energies= -1797.767516

Sum of electronic and thermal Enthalpies= -1797.766572

Sum of electronic and thermal Free Energies= -1797.897436

(3-5) The neutral tetrahedral intermediate Int2'(es)

Standard orientation:

| Center<br>Number | Atomic<br>Number | Atomic<br>Type | Coordinates (Angstroms) |           |           |
|------------------|------------------|----------------|-------------------------|-----------|-----------|
|                  |                  |                | X                       | Y         | Z         |
| 1                | 6                | 0              | -2.443018               | -1.094886 | -0.243629 |
| 2                | 6                | 0              | -1.077415               | -1.053117 | 0.453195  |
| 3                | 8                | 0              | -0.374982               | 0.057453  | -0.027965 |
| 4                | 8                | 0              | -0.294947               | -2.195187 | 0.122159  |
| 5                | 6                | 0              | -0.788351               | -3.474836 | 0.571680  |
| 6                | 6                | 0              | -2.502676               | -1.020639 | -1.642185 |
| 7                | 6                | 0              | -3.730119               | -1.077252 | -2.299410 |
| 8                | 6                | 0              | -3.628291               | -1.243256 | 0.481205  |
| 9                | 6                | 0              | 0.219723                | -4.535372 | 0.163350  |
| 10               | 1                | 0              | -0.910111               | -3.447450 | 1.658583  |
| 11               | 1                | 0              | -1.768642               | -3.661814 | 0.114503  |
| 12               | 8                | 0              | -1.175880               | -1.032465 | 1.851313  |
| 13               | 1                | 0              | -1.563196               | -0.170638 | 2.165214  |
| 14               | 1                | 0              | 2.088190                | 0.934990  | 2.689447  |
| 15               | 8                | 0              | 1.924718                | 0.886810  | 3.658185  |
| 16               | 1                | 0              | 1.673226                | -0.055781 | 3.783440  |
| 17               | 1                | 0              | 0.567238                | 2.004791  | 3.846448  |
| 18               | 8                | 0              | -0.218085               | 2.611911  | 3.805177  |
| 19               | 1                | 0              | -0.000717               | 3.282082  | 3.104701  |
| 20               | 1                | 0              | -1.433279               | 1.822811  | 3.220924  |
| 21               | 8                | 0              | -2.216884               | 1.319495  | 2.781246  |
| 22               | 1                | 0              | -2.904359               | 1.248449  | 3.459913  |
| 23               | 1                | 0              | -1.303083               | 1.752489  | 0.054376  |
| 24               | 8                | 0              | -1.866034               | 2.535807  | 0.229681  |
| 25               | 1                | 0              | -2.338759               | 2.276565  | 1.046745  |
| 26               | 1                | 0              | -0.693388               | 3.803740  | 1.117817  |
| 27               | 8                | 0              | 0.012013                | 4.259796  | 1.622315  |
| 28               | 1                | 0              | 0.762828                | 4.242742  | 0.981708  |
| 29               | 1                | 0              | -1.435197               | 3.662797  | -1.387160 |
| 30               | 8                | 0              | -0.874720               | 4.114505  | -2.046001 |
| 31               | 1                | 0              | -0.833619               | 3.524913  | -2.831650 |
| 32               | 1                | 0              | 0.540583                | 0.122936  | 0.410667  |
| 33               | 8                | 0              | 2.094153                | 0.427400  | 0.879975  |
| 34               | 1                | 0              | 2.555845                | -0.437213 | 0.975757  |
| 35               | 1                | 0              | 2.551339                | 0.914862  | 0.113337  |
| 36               | 8                | 0              | 3.047408                | 1.481682  | -1.318678 |
| 37               | 1                | 0              | 3.590021                | 2.275409  | -1.441314 |
| 38               | 1                | 0              | 1.922479                | 3.096545  | -0.831240 |
| 39               | 8                | 0              | 1.585802                | 4.001423  | -0.664399 |
| 40               | 1                | 0              | 0.794391                | 4.105553  | -1.244504 |

|    |   |   |           |           |           |
|----|---|---|-----------|-----------|-----------|
| 41 | 1 | 0 | 0.363452  | -1.631537 | 2.856697  |
| 42 | 8 | 0 | 1.167324  | -1.853199 | 3.368910  |
| 43 | 1 | 0 | 1.832207  | -2.097720 | 2.692766  |
| 44 | 1 | 0 | 1.828232  | 1.007480  | -2.229356 |
| 45 | 8 | 0 | 0.979224  | 0.574039  | -2.601012 |
| 46 | 1 | 0 | 0.405316  | 0.494441  | -1.813556 |
| 47 | 1 | 0 | 0.132583  | 1.656696  | -3.668588 |
| 48 | 8 | 0 | -0.428422 | 2.310570  | -4.166534 |
| 49 | 1 | 0 | -1.129596 | 1.792259  | -4.586250 |
| 50 | 6 | 0 | -4.859199 | -1.297287 | -0.178448 |
| 51 | 6 | 0 | -4.913585 | -1.211683 | -1.568752 |
| 52 | 1 | 0 | -1.585616 | -0.927932 | -2.215206 |
| 53 | 1 | 0 | -3.762501 | -1.017839 | -3.384188 |
| 54 | 1 | 0 | -3.585400 | -1.319346 | 1.562426  |
| 55 | 1 | 0 | -5.774029 | -1.407396 | 0.398338  |
| 56 | 1 | 0 | -5.870792 | -1.252024 | -2.082454 |
| 57 | 1 | 0 | 0.334516  | -4.580280 | -0.924572 |
| 58 | 1 | 0 | 1.198873  | -4.329585 | 0.606885  |
| 59 | 1 | 0 | -0.119934 | -5.516752 | 0.514405  |
| 60 | 1 | 0 | 1.252712  | -1.293925 | -2.630020 |
| 61 | 8 | 0 | 1.202038  | -2.244142 | -2.374988 |
| 62 | 1 | 0 | 0.665204  | -2.233473 | -1.557205 |
| 63 | 1 | 0 | 4.151669  | 0.346578  | -1.692363 |
| 64 | 8 | 0 | 4.843114  | -0.355436 | -1.951272 |
| 65 | 1 | 0 | 4.937175  | -0.277504 | -2.911882 |
| 66 | 1 | 0 | 4.112443  | -2.017726 | 1.751151  |
| 67 | 8 | 0 | 3.234208  | -2.113016 | 1.352534  |
| 68 | 1 | 0 | 3.397224  | -2.431135 | 0.407017  |
| 69 | 1 | 0 | 4.190635  | -1.933715 | -1.490003 |
| 70 | 8 | 0 | 3.693743  | -2.738408 | -1.191266 |
| 71 | 1 | 0 | 2.831088  | -2.670670 | -1.668841 |

-----  
SCF Done: E(RB3LYP) = -1798.41464479 A.U. after 1 cycles

Conv = 0.2877D-08 -V/T = 2.0093

Zero-point correction= 0.598737 (a.u.)

Thermal correction to Energy= 0.647229

Thermal correction to Enthalpy= 0.648173

Thermal correction to Gibbs Free Energy= 0.516669

Sum of electronic and zero-point Energies= -1797.815908

Sum of electronic and thermal Energies= -1797.767416

Sum of electronic and thermal Enthalpies= -1797.766471

Sum of electronic and thermal Free Energies= -1797.897975

(3-6) TS2(es), MeO- dissociation along with ethanol formation  
zukaphxx.chk Stoichiometry C9H43O19(1-)

Standard orientation:

| Center<br>Number | Atomic<br>Number | Atomic<br>Type | Coordinates (Angstroms) |           |           |
|------------------|------------------|----------------|-------------------------|-----------|-----------|
|                  |                  |                | X                       | Y         | Z         |
| 1                | 6                | 0              | -3.277696               | -0.456962 | -0.444548 |
| 2                | 6                | 0              | -1.848302               | -0.009070 | -0.660236 |
| 3                | 8                | 0              | -1.387972               | 0.974205  | 0.000929  |
| 4                | 8                | 0              | -1.486841               | -0.143223 | -1.981988 |
| 5                | 1                | 0              | -0.754402               | 0.480849  | -2.192822 |
| 6                | 6                | 0              | -4.008673               | 0.092464  | 0.613114  |
| 7                | 6                | 0              | -5.335165               | -0.287535 | 0.830182  |
| 8                | 6                | 0              | -3.895718               | -1.386162 | -1.292627 |
| 9                | 8                | 0              | -0.944167               | -1.494976 | -0.022935 |
| 10               | 6                | 0              | -1.235077               | -1.921964 | 1.298982  |
| 11               | 1                | 0              | -1.881845               | -1.182393 | 1.795255  |
| 12               | 6                | 0              | -1.905215               | -3.295308 | 1.336169  |
| 13               | 1                | 0              | -0.301261               | -1.957481 | 1.883135  |
| 14               | 1                | 0              | 0.562466                | -0.889020 | 0.011992  |
| 15               | 8                | 0              | 1.563775                | -0.733516 | 0.063702  |
| 16               | 1                | 0              | 1.818213                | 0.049217  | -0.480187 |
| 17               | 1                | 0              | 2.110630                | -2.109538 | -0.800231 |
| 18               | 8                | 0              | 2.411976                | -2.935418 | -1.268746 |
| 19               | 1                | 0              | 1.571741                | -3.233119 | -1.697125 |
| 20               | 1                | 0              | 3.874878                | -1.826116 | -1.950778 |
| 21               | 8                | 0              | 4.488666                | -1.061373 | -1.979431 |
| 22               | 1                | 0              | 4.909436                | -1.039451 | -1.089883 |
| 23               | 1                | 0              | 3.194218                | -2.402841 | 1.945885  |
| 24               | 8                | 0              | 3.145209                | -1.427665 | 2.099746  |
| 25               | 1                | 0              | 2.527333                | -1.110310 | 1.382316  |
| 26               | 1                | 0              | 2.054275                | -0.825147 | 3.393721  |
| 27               | 8                | 0              | 1.376263                | -0.374730 | 3.956937  |
| 28               | 1                | 0              | 1.878058                | 0.172097  | 4.578984  |
| 29               | 1                | 0              | 3.417345                | 0.378658  | -1.912391 |
| 30               | 8                | 0              | 2.742970                | 1.066350  | -1.673193 |
| 31               | 1                | 0              | 2.081139                | 1.104272  | -2.399718 |
| 32               | 1                | 0              | -0.586647               | 1.081181  | 1.617636  |
| 33               | 8                | 0              | -0.156936               | 1.457469  | 2.425237  |
| 34               | 1                | 0              | 0.298786                | 0.728274  | 2.904816  |
| 35               | 1                | 0              | 0.916212                | 2.749155  | 1.848870  |
| 36               | 8                | 0              | 1.217557                | 3.642171  | 1.536486  |
| 37               | 1                | 0              | 0.739591                | 4.248458  | 2.132822  |
| 38               | 1                | 0              | -1.198731               | 3.105038  | 2.922617  |
| 39               | 8                | 0              | -1.427675               | 4.050077  | 2.810305  |
| 40               | 1                | 0              | -1.696582               | 4.106884  | 1.872728  |
| 41               | 1                | 0              | -1.344826               | 2.752728  | -0.224953 |
| 42               | 8                | 0              | -1.113869               | 3.712331  | -0.165725 |

|    |   |   |           |           |           |
|----|---|---|-----------|-----------|-----------|
| 43 | 1 | 0 | -0.247516 | 3.708440  | 0.297319  |
| 44 | 1 | 0 | -0.299646 | 4.043655  | -1.804467 |
| 45 | 8 | 0 | 0.379674  | 4.024431  | -2.520625 |
| 46 | 1 | 0 | 1.239200  | 4.089830  | -2.030638 |
| 47 | 1 | 0 | 4.679456  | -0.968643 | 1.274360  |
| 48 | 8 | 0 | 5.464098  | -0.793102 | 0.694886  |
| 49 | 1 | 0 | 5.668074  | 0.146563  | 0.814193  |
| 50 | 1 | 0 | -0.584199 | -2.622944 | -1.275531 |
| 51 | 8 | 0 | -0.256189 | -3.148906 | -2.061928 |
| 52 | 1 | 0 | -0.451527 | -2.556211 | -2.804143 |
| 53 | 1 | 0 | 2.990066  | -3.789738 | 0.176305  |
| 54 | 8 | 0 | 3.366068  | -4.028144 | 1.065103  |
| 55 | 1 | 0 | 4.301268  | -4.220406 | 0.900862  |
| 56 | 1 | 0 | 0.312211  | 1.384131  | -4.170561 |
| 57 | 8 | 0 | 0.477949  | 1.478332  | -3.220982 |
| 58 | 1 | 0 | 0.390251  | 2.465698  | -3.012666 |
| 59 | 1 | 0 | 2.871819  | 2.853758  | -1.141019 |
| 60 | 8 | 0 | 2.675882  | 3.796967  | -0.945535 |
| 61 | 1 | 0 | 2.315408  | 3.803385  | -0.035005 |
| 62 | 6 | 0 | -5.220692 | -1.761675 | -1.078647 |
| 63 | 6 | 0 | -5.944635 | -1.215573 | -0.014152 |
| 64 | 1 | 0 | -3.529179 | 0.828341  | 1.250552  |
| 65 | 1 | 0 | -5.891806 | 0.147444  | 1.656793  |
| 66 | 1 | 0 | -3.330976 | -1.810104 | -2.115645 |
| 67 | 1 | 0 | -5.690449 | -2.482996 | -1.743314 |
| 68 | 1 | 0 | -6.978192 | -1.510722 | 0.151940  |
| 69 | 1 | 0 | -2.097479 | -3.601033 | 2.373192  |
| 70 | 1 | 0 | -2.857712 | -3.276769 | 0.796687  |
| 71 | 1 | 0 | -1.263548 | -4.052613 | 0.870738  |

-----  
SCF Done: E(RB+HF-LYP) = -1798.40938611 A.U. after 1 cycles

Conv = 0.2706D-08 -V/T = 2.0093

S\*\*2 = 0.0000

Zero-point correction= 0.597771 (a.u.)  
Thermal correction to Energy= 0.646983  
Thermal correction to Enthalpy= 0.647927  
Thermal correction to Gibbs Free Energy= 0.512972  
Sum of electronic and zero-point Energies= -1797.811615  
Sum of electronic and thermal Energies= -1797.762403  
Sum of electronic and thermal Enthalpies= -1797.761459  
Sum of electronic and thermal Free Energies= -1797.896414

(3-7) Ph-COOH + Et-OH + OH-(H2O)15, Int2(es)

zukaphxx.for.chk Stoichiometry C9H43O19(1-)

Standard orientation:  
-----

| Center<br>Number | Atomic<br>Number | Atomic<br>Type | Coordinates (Angstroms) |           |           |
|------------------|------------------|----------------|-------------------------|-----------|-----------|
|                  |                  |                | X                       | Y         | Z         |
| 1                | 6                | 0              | -4.193976               | 0.341137  | -0.306271 |
| 2                | 6                | 0              | -3.073311               | 1.316272  | -0.427954 |
| 3                | 8                | 0              | -2.367550               | 1.660314  | 0.519539  |
| 4                | 8                | 0              | -2.913768               | 1.789396  | -1.663375 |
| 5                | 1                | 0              | -2.087408               | 2.349659  | -1.754490 |
| 6                | 6                | 0              | -4.400550               | -0.316598 | 0.915160  |
| 7                | 6                | 0              | -5.442877               | -1.233326 | 1.041538  |
| 8                | 6                | 0              | -5.037490               | 0.070674  | -1.394749 |
| 9                | 8                | 0              | -0.355133               | -2.736659 | -0.195011 |
| 10               | 6                | 0              | -0.786356               | -3.295921 | 1.046540  |
| 11               | 1                | 0              | -1.027749               | -2.486302 | 1.747335  |
| 12               | 6                | 0              | -2.012649               | -4.163785 | 0.806592  |
| 13               | 1                | 0              | 0.021667                | -3.897180 | 1.491356  |
| 14               | 1                | 0              | 0.384132                | -2.067892 | -0.020314 |
| 15               | 8                | 0              | 1.670034                | -1.049276 | 0.159293  |
| 16               | 1                | 0              | 1.421906                | -0.272406 | -0.379055 |
| 17               | 1                | 0              | 2.387987                | -1.929564 | -1.069778 |
| 18               | 8                | 0              | 2.859456                | -2.393765 | -1.835464 |
| 19               | 1                | 0              | 2.212385                | -3.067452 | -2.149344 |
| 20               | 1                | 0              | 3.287948                | -0.805725 | -2.751490 |
| 21               | 8                | 0              | 3.443353                | 0.131511  | -3.009112 |
| 22               | 1                | 0              | 4.070772                | 0.488171  | -2.332972 |
| 23               | 1                | 0              | 4.661120                | -1.624809 | 0.547541  |
| 24               | 8                | 0              | 4.205786                | -0.856350 | 0.965702  |
| 25               | 1                | 0              | 3.244123                | -0.914400 | 0.644553  |
| 26               | 1                | 0              | 3.992912                | -0.985124 | 2.675642  |
| 27               | 8                | 0              | 3.674409                | -0.969244 | 3.621144  |
| 28               | 1                | 0              | 4.210040                | -0.292597 | 4.059560  |
| 29               | 1                | 0              | 2.008931                | 0.881112  | -2.363909 |
| 30               | 8                | 0              | 1.341290                | 1.239841  | -1.716759 |
| 31               | 1                | 0              | 0.645582                | 1.729680  | -2.196823 |
| 32               | 1                | 0              | 1.312665                | -0.519892 | 1.647904  |
| 33               | 8                | 0              | 1.169882                | -0.135529 | 2.584532  |
| 34               | 1                | 0              | 1.918069                | -0.490860 | 3.116732  |
| 35               | 1                | 0              | 1.426486                | 1.490519  | 2.468576  |
| 36               | 8                | 0              | 1.575440                | 2.487937  | 2.392446  |
| 37               | 1                | 0              | 1.955144                | 2.765645  | 3.239004  |
| 38               | 1                | 0              | -0.683609               | -0.087319 | 2.981430  |
| 39               | 8                | 0              | -1.646155               | 0.101389  | 3.003684  |
| 40               | 1                | 0              | -1.798969               | 0.663503  | 2.223831  |
| 41               | 1                | 0              | -1.342745               | 3.180209  | 1.191539  |
| 42               | 8                | 0              | -0.739964               | 3.870313  | 1.531790  |
| 43               | 1                | 0              | 0.001537                | 3.373345  | 1.944740  |

|    |   |   |           |           |           |
|----|---|---|-----------|-----------|-----------|
| 44 | 1 | 0 | 0.048753  | 4.593871  | 0.119716  |
| 45 | 8 | 0 | 0.542171  | 4.770171  | -0.724381 |
| 46 | 1 | 0 | 1.419163  | 4.339843  | -0.576553 |
| 47 | 1 | 0 | 4.732834  | 0.543463  | -0.136967 |
| 48 | 8 | 0 | 4.897046  | 1.223386  | -0.832146 |
| 49 | 1 | 0 | 4.319835  | 1.976186  | -0.581746 |
| 50 | 1 | 0 | 0.211973  | -3.674764 | -1.512276 |
| 51 | 8 | 0 | 0.642931  | -4.064269 | -2.325603 |
| 52 | 1 | 0 | 0.115597  | -3.731893 | -3.066903 |
| 53 | 1 | 0 | 4.390763  | -2.879496 | -1.162742 |
| 54 | 8 | 0 | 5.248233  | -2.915453 | -0.658388 |
| 55 | 1 | 0 | 5.899645  | -2.499937 | -1.242951 |
| 56 | 1 | 0 | -0.843289 | 3.597790  | -3.210556 |
| 57 | 8 | 0 | -0.702742 | 3.146102  | -2.365120 |
| 58 | 1 | 0 | -0.232912 | 3.814705  | -1.756225 |
| 59 | 1 | 0 | 2.201448  | 2.355504  | -0.708156 |
| 60 | 8 | 0 | 2.699354  | 3.030587  | -0.174541 |
| 61 | 1 | 0 | 2.452978  | 2.841712  | 0.757515  |
| 62 | 6 | 0 | -6.082383 | -0.840299 | -1.258633 |
| 63 | 6 | 0 | -6.286355 | -1.493750 | -0.040722 |
| 64 | 1 | 0 | -3.735679 | -0.129278 | 1.751059  |
| 65 | 1 | 0 | -5.591293 | -1.746676 | 1.987341  |
| 66 | 1 | 0 | -4.865744 | 0.574816  | -2.338959 |
| 67 | 1 | 0 | -6.734249 | -1.044843 | -2.103960 |
| 68 | 1 | 0 | -7.098603 | -2.209251 | 0.062506  |
| 69 | 1 | 0 | -2.349600 | -4.616812 | 1.747128  |
| 70 | 1 | 0 | -2.833651 | -3.564577 | 0.397947  |
| 71 | 1 | 0 | -1.787806 | -4.970313 | 0.098374  |

-----  
SCF Done: E(RB+HF-LYP) = -1798.44248409 A.U. after 1 cycles

Convq = 0.3169D-08 -V/T = 2.0093

S\*\*2 = 0.0000

Zero-point correction= 0.598206 (a.u.)  
Thermal correction to Energy= 0.648012  
Thermal correction to Enthalpy= 0.648956  
Thermal correction to Gibbs Free Energy= 0.509867  
Sum of electronic and zero-point Energies= -1797.844278  
Sum of electronic and thermal Energies= -1797.794472  
Sum of electronic and thermal Enthalpies= -1797.793528  
Sum of electronic and thermal Free Energies= -1797.932617

(3-8) TS3(es) toward the product, PhCOO-, EtOH and (H2O)16,  
carboxylate formation TS, TS3(es),

zukaphqd.g09.chk Stoichiometry C9H43O19(1-)

Standard orientation:

-----

| Center<br>Number | Atomic<br>Number | Atomic<br>Type | Coordinates (Angstroms) |           |           |
|------------------|------------------|----------------|-------------------------|-----------|-----------|
|                  |                  |                | X                       | Y         | Z         |
| 1                | 6                | 0              | 2.036322                | 2.500396  | 0.716031  |
| 2                | 6                | 0              | 1.909812                | 1.150472  | 1.353015  |
| 3                | 8                | 0              | 2.914070                | 0.447730  | 1.555548  |
| 4                | 8                | 0              | 0.318486                | -2.944046 | -1.562960 |
| 5                | 6                | 0              | -0.110992               | -4.151317 | -2.210893 |
| 6                | 6                | 0              | 3.198964                | 3.253240  | 0.944045  |
| 7                | 6                | 0              | 3.353802                | 4.501892  | 0.343613  |
| 8                | 6                | 0              | 1.036135                | 3.009249  | -0.122835 |
| 9                | 1                | 0              | -0.721390               | -3.896559 | -3.087719 |
| 10               | 1                | 0              | -0.735378               | -4.732893 | -1.519061 |
| 11               | 6                | 0              | 1.112609                | -4.950554 | -2.627568 |
| 12               | 8                | 0              | 0.688578                | 0.806480  | 1.666504  |
| 13               | 1                | 0              | -2.260745               | -0.022289 | 1.454031  |
| 14               | 1                | 0              | 0.527563                | -0.197389 | 2.081489  |
| 15               | 8                | 0              | 0.043161                | -1.413979 | 2.541757  |
| 16               | 1                | 0              | 0.423671                | -1.659501 | 3.419380  |
| 17               | 1                | 0              | 1.057858                | -1.668522 | -2.753803 |
| 18               | 8                | 0              | 1.223272                | -0.956092 | -3.407913 |
| 19               | 1                | 0              | 2.145784                | -0.657610 | -3.257490 |
| 20               | 8                | 0              | -2.054632               | 0.699559  | 0.725116  |
| 21               | 1                | 0              | -1.815200               | -0.703556 | -0.565800 |
| 22               | 1                | 0              | -1.204383               | 1.074424  | 1.020041  |
| 23               | 8                | 0              | -2.430225               | -1.202052 | 2.380535  |
| 24               | 1                | 0              | -1.040192               | -1.385072 | 2.569535  |
| 25               | 1                | 0              | -2.861512               | -0.949293 | 3.210338  |
| 26               | 1                | 0              | 0.732609                | -2.784371 | 1.521053  |
| 27               | 8                | 0              | 1.334862                | -3.405062 | 1.049727  |
| 28               | 1                | 0              | 1.116148                | -3.278938 | 0.100279  |
| 29               | 8                | 0              | -1.902783               | -1.421712 | -1.233307 |
| 30               | 1                | 0              | -0.492596               | -2.406098 | -1.341850 |
| 31               | 1                | 0              | -1.843496               | -0.945461 | -2.110788 |
| 32               | 1                | 0              | 3.296770                | -1.329875 | 2.230344  |
| 33               | 8                | 0              | 3.372939                | -2.259713 | 2.524447  |
| 34               | 1                | 0              | 2.807964                | -2.756651 | 1.881462  |
| 35               | 8                | 0              | -2.158405               | 2.214390  | -1.788640 |
| 36               | 1                | 0              | -2.186583               | 1.718756  | -0.945485 |
| 37               | 1                | 0              | -3.108880               | 2.360930  | -1.999252 |
| 38               | 8                | 0              | -4.985421               | 2.262719  | -1.940182 |
| 39               | 1                | 0              | -5.077312               | 1.631593  | -1.181975 |
| 40               | 1                | 0              | -5.482973               | 3.049967  | -1.674478 |
| 41               | 1                | 0              | 4.226611                | 0.536469  | 0.222657  |
| 42               | 8                | 0              | 4.811194                | 0.733534  | -0.544868 |
| 43               | 1                | 0              | 4.719752                | 1.690848  | -0.669896 |



|    |   |   |           |           |           |
|----|---|---|-----------|-----------|-----------|
| 44 | 1 | 0 | 4.256618  | -0.019601 | -2.071558 |
| 45 | 8 | 0 | 3.980121  | -0.366981 | -2.954242 |
| 46 | 1 | 0 | 4.479339  | -1.187297 | -3.077858 |
| 47 | 1 | 0 | -3.623462 | -1.823936 | 1.217544  |
| 48 | 8 | 0 | -4.226169 | -1.901614 | 0.427352  |
| 49 | 1 | 0 | -3.602728 | -1.971836 | -0.324860 |
| 50 | 1 | 0 | -3.992744 | 1.020436  | 0.628488  |
| 51 | 8 | 0 | -4.890001 | 0.735260  | 0.356843  |
| 52 | 1 | 0 | -4.792561 | -0.260778 | 0.316529  |
| 53 | 8 | 0 | -1.400483 | 0.049349  | -3.454810 |
| 54 | 1 | 0 | -0.428894 | -0.095184 | -3.523973 |
| 55 | 1 | 0 | -1.544350 | 0.923306  | -3.026704 |
| 56 | 8 | 0 | 1.661088  | -2.251286 | 4.642235  |
| 57 | 1 | 0 | 1.505813  | -3.170858 | 4.903652  |
| 58 | 1 | 0 | 2.389517  | -2.289075 | 3.960020  |
| 59 | 8 | 0 | -6.977170 | 1.580539  | 2.059644  |
| 60 | 1 | 0 | -6.229476 | 1.301961  | 1.481970  |
| 61 | 1 | 0 | -7.336579 | 0.751392  | 2.407048  |
| 62 | 6 | 0 | 1.203692  | 4.250024  | -0.737908 |
| 63 | 6 | 0 | 2.358162  | 4.998642  | -0.503059 |
| 64 | 1 | 0 | 3.962992  | 2.859267  | 1.608241  |
| 65 | 1 | 0 | 4.248349  | 5.088032  | 0.537806  |
| 66 | 1 | 0 | 0.140447  | 2.433601  | -0.324746 |
| 67 | 1 | 0 | 0.427907  | 4.620485  | -1.401192 |
| 68 | 1 | 0 | 2.484082  | 5.967915  | -0.978714 |
| 69 | 1 | 0 | 1.729616  | -4.375932 | -3.327050 |
| 70 | 1 | 0 | 1.723879  | -5.208388 | -1.755604 |
| 71 | 1 | 0 | 0.807267  | -5.880872 | -3.120978 |

-----  
SCF Done: E(RB3LYP) = -1798.42252801 A.U. after 15 cycles

Convq = 0.2447D-08 -V/T = 2.0093

Zero-point correction= 0.590177 (a.u.)

Thermal correction to Energy= 0.641587

Thermal correction to Enthalpy= 0.642531

Thermal correction to Gibbs Free Energy= 0.497017

Sum of electronic and zero-point Energies= -1797.832351

Sum of electronic and thermal Energies= -1797.780941

Sum of electronic and thermal Enthalpies= -1797.779997

Sum of electronic and thermal Free Energies= -1797.925511

(3-9) Product, Ph-COO-, EtOH and OH-(H2O)16

zukaphqd.g09for.chk Stoichiometry C9H43O19(1-)

Standard orientation:

-----  
Center Atomic Atomic Coordinates (Angstroms)  
Number Number Type X Y Z

|    |   |   |           |           |           |
|----|---|---|-----------|-----------|-----------|
| 1  | 6 | 0 | 2.219578  | 2.139236  | 0.842410  |
| 2  | 6 | 0 | 1.923938  | 0.731695  | 1.320712  |
| 3  | 8 | 0 | 2.918525  | -0.024143 | 1.524212  |
| 4  | 8 | 0 | -0.185925 | -2.827564 | -1.798361 |
| 5  | 6 | 0 | -0.627622 | -3.958382 | -2.564240 |
| 6  | 6 | 0 | 3.368116  | 2.801805  | 1.301942  |
| 7  | 6 | 0 | 3.658344  | 4.097017  | 0.870804  |
| 8  | 6 | 0 | 1.376885  | 2.792605  | -0.064693 |
| 9  | 1 | 0 | -1.058588 | -3.610937 | -3.513216 |
| 10 | 1 | 0 | -1.411547 | -4.491939 | -2.008992 |
| 11 | 6 | 0 | 0.559777  | -4.871739 | -2.819788 |
| 12 | 8 | 0 | 0.709770  | 0.407138  | 1.494778  |
| 13 | 1 | 0 | -2.188560 | 0.162170  | 1.149848  |
| 14 | 1 | 0 | 0.053178  | -1.008404 | 2.352242  |
| 15 | 8 | 0 | -0.478975 | -1.760878 | 2.723587  |
| 16 | 1 | 0 | 0.048229  | -2.114184 | 3.481699  |
| 17 | 1 | 0 | 0.812747  | -1.570209 | -2.854656 |
| 18 | 8 | 0 | 1.080835  | -0.868694 | -3.484645 |
| 19 | 1 | 0 | 2.010309  | -0.639534 | -3.259418 |
| 20 | 8 | 0 | -1.761933 | 0.809997  | 0.528895  |
| 21 | 1 | 0 | -1.907845 | -0.377443 | -0.904654 |
| 22 | 1 | 0 | -0.819097 | 0.855268  | 0.850324  |
| 23 | 8 | 0 | -3.019880 | -1.014296 | 2.174836  |
| 24 | 1 | 0 | -2.191889 | -1.375066 | 2.586868  |
| 25 | 1 | 0 | -3.511393 | -0.476141 | 2.832208  |
| 26 | 1 | 0 | 0.036492  | -3.046286 | 1.431097  |
| 27 | 8 | 0 | 0.559913  | -3.643216 | 0.850841  |
| 28 | 1 | 0 | 0.376440  | -3.344465 | -0.066150 |
| 29 | 8 | 0 | -2.207248 | -0.994241 | -1.613231 |
| 30 | 1 | 0 | -0.956380 | -2.212033 | -1.670144 |
| 31 | 1 | 0 | -2.013562 | -0.493549 | -2.460441 |
| 32 | 1 | 0 | 2.889542  | -1.785661 | 1.996860  |
| 33 | 8 | 0 | 2.840777  | -2.744130 | 2.229916  |
| 34 | 1 | 0 | 2.176308  | -3.119339 | 1.604682  |
| 35 | 8 | 0 | -1.763474 | 2.641465  | -1.871371 |
| 36 | 1 | 0 | -1.772815 | 2.103032  | -1.057856 |
| 37 | 1 | 0 | -2.670333 | 3.017230  | -1.921219 |
| 38 | 8 | 0 | -4.460081 | 3.524067  | -1.508504 |
| 39 | 1 | 0 | -4.636050 | 2.886434  | -0.773889 |
| 40 | 1 | 0 | -4.523428 | 4.404544  | -1.110315 |
| 41 | 1 | 0 | 4.189568  | 0.109361  | 0.298625  |
| 42 | 8 | 0 | 4.813458  | 0.304885  | -0.450137 |
| 43 | 1 | 0 | 4.860064  | 1.273260  | -0.463463 |
| 44 | 1 | 0 | 4.138867  | -0.206654 | -1.997860 |
| 45 | 8 | 0 | 3.824867  | -0.478742 | -2.898705 |

|    |   |   |           |           |           |
|----|---|---|-----------|-----------|-----------|
| 46 | 1 | 0 | 4.278548  | -1.314039 | -3.082664 |
| 47 | 1 | 0 | -4.182598 | -1.280129 | 0.627216  |
| 48 | 8 | 0 | -4.630780 | -0.959268 | -0.183552 |
| 49 | 1 | 0 | -3.944749 | -1.065859 | -0.883124 |
| 50 | 1 | 0 | -3.490773 | 1.669166  | 0.622887  |
| 51 | 8 | 0 | -4.470788 | 1.664031  | 0.558759  |
| 52 | 1 | 0 | -4.654144 | 0.754274  | 0.185961  |
| 53 | 8 | 0 | -1.349041 | 0.491579  | -3.690083 |
| 54 | 1 | 0 | -0.408952 | 0.189933  | -3.700295 |
| 55 | 1 | 0 | -1.375254 | 1.355328  | -3.222302 |
| 56 | 8 | 0 | 1.366157  | -2.869816 | 4.479592  |
| 57 | 1 | 0 | 1.223322  | -3.812856 | 4.647460  |
| 58 | 1 | 0 | 2.021849  | -2.835555 | 3.720585  |
| 59 | 8 | 0 | -4.834060 | 0.862922  | 3.230160  |
| 60 | 1 | 0 | -4.825465 | 1.269647  | 2.329815  |
| 61 | 1 | 0 | -5.724283 | 0.498637  | 3.342652  |
| 62 | 6 | 0 | 1.678089  | 4.078641  | -0.514149 |
| 63 | 6 | 0 | 2.816014  | 4.736362  | -0.043056 |
| 64 | 1 | 0 | 4.019357  | 2.294013  | 2.007588  |
| 65 | 1 | 0 | 4.541929  | 4.607041  | 1.247672  |
| 66 | 1 | 0 | 0.494086  | 2.290927  | -0.442657 |
| 67 | 1 | 0 | 1.019382  | 4.557697  | -1.233086 |
| 68 | 1 | 0 | 3.047650  | 5.741529  | -0.387324 |
| 69 | 1 | 0 | 1.336266  | -4.345479 | -3.385478 |
| 70 | 1 | 0 | 0.992363  | -5.217080 | -1.874665 |
| 71 | 1 | 0 | 0.245581  | -5.748867 | -3.397969 |

-----  
SCF Done: E(RB+HF-LYP) = -1798.45216901 A.U. after 1 cycles

Conv = 0.1812D-08 -V/T = 2.0093

S\*\*2 = 0.0000

Zero-point correction= 0.598603 (a.u.)  
Thermal correction to Energy= 0.649832  
Thermal correction to Enthalpy= 0.650776  
Thermal correction to Gibbs Free Energy= 0.506339  
Sum of electronic and zero-point Energies= -1797.853566  
Sum of electronic and thermal Energies= -1797.802337  
Sum of electronic and thermal Enthalpies= -1797.801393  
Sum of electronic and thermal Free Energies= -1797.945830

[4] Geometries of the n=16 amide hydrolysis in Figure 4

(4-1) N-ethyl benzamide(C6H5-C(=O)-NH-C2H5) + HO-(H2O)16,

Reactant-like complex (precursor)

tuka02aa.for.chk Stoichiometry C9H44NO18(1-)

Standard orientation:

| -----  |        |        |                         |           |           |  |
|--------|--------|--------|-------------------------|-----------|-----------|--|
| Center | Atomic | Atomic | Coordinates (Angstroms) |           |           |  |
| Number | Number | Type   | X                       | Y         | Z         |  |
| -----  |        |        |                         |           |           |  |
| 1      | 6      | 0      | -0.861514               | 2.709843  | -0.501915 |  |
| 2      | 6      | 0      | -0.690971               | 1.733148  | 0.623989  |  |
| 3      | 8      | 0      | -1.420190               | 0.704973  | 0.673568  |  |
| 4      | 7      | 0      | 0.198295                | 2.031833  | 1.579504  |  |
| 5      | 6      | 0      | 0.502385                | 1.152724  | 2.711487  |  |
| 6      | 6      | 0      | -2.117233               | 2.786377  | -1.120274 |  |
| 7      | 6      | 0      | -2.336311               | 3.684164  | -2.163839 |  |
| 8      | 6      | 0      | 0.179791                | 3.532840  | -0.955945 |  |
| 9      | 1      | 0      | 0.867083                | 2.785764  | 1.420775  |  |
| 10     | 6      | 0      | 0.927105                | 1.965886  | 3.932425  |  |
| 11     | 1      | 0      | -0.391108               | 0.566469  | 2.930386  |  |
| 12     | 1      | 0      | 1.292101                | 0.450170  | 2.418390  |  |
| 13     | 8      | 0      | 1.800161                | 0.573021  | -1.007530 |  |
| 14     | 1      | 0      | 1.415834                | 0.314744  | -1.868968 |  |
| 15     | 1      | 0      | 1.820346                | -0.262685 | -0.444009 |  |
| 16     | 8      | 0      | 2.048665                | -1.644330 | 0.456905  |  |
| 17     | 1      | 0      | 2.685518                | -1.419381 | 1.154218  |  |
| 18     | 1      | 0      | 2.740073                | -2.246120 | -0.557112 |  |
| 19     | 8      | 0      | 3.320823                | -2.682721 | -1.389643 |  |
| 20     | 1      | 0      | 3.607329                | -1.919098 | -1.917349 |  |
| 21     | 1      | 0      | 4.675702                | -3.026385 | -0.452523 |  |
| 22     | 8      | 0      | 5.414589                | -3.075584 | 0.228531  |  |
| 23     | 1      | 0      | 5.157318                | -3.799741 | 0.818625  |  |
| 24     | 1      | 0      | 1.885758                | -3.106436 | -2.481622 |  |
| 25     | 8      | 0      | 1.152818                | -3.050877 | -3.140570 |  |
| 26     | 1      | 0      | 0.342078                | -3.426739 | -2.713636 |  |
| 27     | 1      | 0      | 0.735115                | -1.473943 | -3.304279 |  |
| 28     | 8      | 0      | 0.431496                | -0.507791 | -3.325079 |  |
| 29     | 1      | 0      | 0.483269                | -0.224639 | -4.249477 |  |
| 30     | 1      | 0      | 5.233637                | -1.506476 | 1.020961  |  |
| 31     | 8      | 0      | 5.054676                | -0.638899 | 1.472446  |  |
| 32     | 1      | 0      | 5.843688                | -0.450428 | 2.001146  |  |
| 33     | 1      | 0      | -1.765896               | -0.256752 | -1.013946 |  |
| 34     | 8      | 0      | -1.976963               | -0.715244 | -1.854467 |  |
| 35     | 1      | 0      | -1.221079               | -0.513885 | -2.451679 |  |
| 36     | 1      | 0      | -1.625342               | -2.651273 | -2.056358 |  |

|    |   |   |           |           |           |
|----|---|---|-----------|-----------|-----------|
| 37 | 8 | 0 | -1.355092 | -3.588200 | -2.154826 |
| 38 | 1 | 0 | -1.640726 | -3.984455 | -1.303000 |
| 39 | 1 | 0 | -3.710527 | -1.546114 | -1.314937 |
| 40 | 8 | 0 | -4.306091 | -2.108197 | -0.783809 |
| 41 | 1 | 0 | -4.814834 | -1.506730 | -0.194797 |
| 42 | 1 | 0 | -0.703828 | -1.041623 | 1.125764  |
| 43 | 8 | 0 | -0.396350 | -1.938459 | 1.363296  |
| 44 | 1 | 0 | 0.568963  | -1.949541 | 1.047982  |
| 45 | 1 | 0 | -1.444357 | -2.417297 | 2.850279  |
| 46 | 8 | 0 | -2.328893 | -2.616090 | 3.233185  |
| 47 | 1 | 0 | -2.693022 | -3.228655 | 2.562453  |
| 48 | 1 | 0 | -1.655209 | -3.102923 | 0.673297  |
| 49 | 8 | 0 | -2.397843 | -3.728163 | 0.500124  |
| 50 | 1 | 0 | -3.129147 | -3.183637 | 0.119158  |
| 51 | 1 | 0 | 3.332473  | 1.267120  | -0.539690 |
| 52 | 8 | 0 | 4.107862  | 1.629142  | -0.036233 |
| 53 | 1 | 0 | 4.461253  | 0.863013  | 0.466471  |
| 54 | 1 | 0 | 3.328200  | 2.800314  | 0.916351  |
| 55 | 8 | 0 | 2.779249  | 3.491708  | 1.391457  |
| 56 | 1 | 0 | 3.215407  | 4.337144  | 1.213258  |
| 57 | 1 | 0 | -3.091092 | -0.994891 | 2.938067  |
| 58 | 8 | 0 | -3.401774 | -0.099038 | 2.648308  |
| 59 | 1 | 0 | -2.727902 | 0.209064  | 2.008869  |
| 60 | 1 | 0 | -4.840916 | -0.315391 | 1.729737  |
| 61 | 8 | 0 | -5.603076 | -0.466255 | 1.103993  |
| 62 | 1 | 0 | -5.944689 | 0.412480  | 0.886411  |
| 63 | 6 | 0 | -0.041641 | 4.422326  | -2.006988 |
| 64 | 6 | 0 | -1.298655 | 4.505151  | -2.609470 |
| 65 | 1 | 0 | -2.912840 | 2.133405  | -0.777830 |
| 66 | 1 | 0 | -3.315344 | 3.736255  | -2.632579 |
| 67 | 1 | 0 | 1.168678  | 3.455182  | -0.517107 |
| 68 | 1 | 0 | 0.775669  | 5.044505  | -2.362531 |
| 69 | 1 | 0 | -1.465934 | 5.199529  | -3.429295 |
| 70 | 1 | 0 | 1.807594  | 2.577053  | 3.709358  |
| 71 | 1 | 0 | 0.116881  | 2.625437  | 4.263823  |
| 72 | 1 | 0 | 1.175471  | 1.288048  | 4.756365  |

-----  
SCF Done: E(RB+HF-LYP) = -1778.55871751 A.U. after 1 cycles

Conv = 0.3275D-08 -V/T = 2.0093

S\*\*2 = 0.0000

Zero-point correction= 0.606387 (a.u.)

Thermal correction to Energy= 0.657935

Thermal correction to Enthalpy= 0.658880

Thermal correction to Gibbs Free Energy= 0.516969

Sum of electronic and zero-point Energies= -1777.952330

Sum of electronic and thermal Energies= -1777.900782

Sum of electronic and thermal Enthalpies= -1777.899838  
Sum of electronic and thermal Free Energies= -1778.041748

(4-2) N-ethyl benzamide + HO-(H2O)16 TS1(am)  
tuka02aa.chk Stoichiometry C9H44NO18(1-)

Standard orientation:

| -----  |        |        |                         |           |           |  |
|--------|--------|--------|-------------------------|-----------|-----------|--|
| Center | Atomic | Atomic | Coordinates (Angstroms) |           |           |  |
| Number | Number | Type   | X                       | Y         | Z         |  |
| -----  |        |        |                         |           |           |  |
| 1      | 6      | 0      | -0.470652               | 2.399800  | -0.844394 |  |
| 2      | 6      | 0      | -0.180315               | 1.366931  | 0.254620  |  |
| 3      | 8      | 0      | -1.118661               | 0.470879  | 0.459457  |  |
| 4      | 7      | 0      | 0.342700                | 2.010664  | 1.397317  |  |
| 5      | 6      | 0      | 0.645579                | 1.245170  | 2.603188  |  |
| 6      | 6      | 0      | -1.799864               | 2.635945  | -1.211927 |  |
| 7      | 6      | 0      | -2.113841               | 3.598584  | -2.173143 |  |
| 8      | 6      | 0      | 0.540684                | 3.151935  | -1.458527 |  |
| 9      | 1      | 0      | 1.076941                | 2.683243  | 1.182820  |  |
| 10     | 6      | 0      | 0.885925                | 2.186439  | 3.783055  |  |
| 11     | 1      | 0      | -0.202787               | 0.591747  | 2.814586  |  |
| 12     | 1      | 0      | 1.528264                | 0.597069  | 2.466522  |  |
| 13     | 8      | 0      | 1.157664                | 0.509965  | -0.411976 |  |
| 14     | 1      | 0      | 0.896889                | 0.227086  | -1.314410 |  |
| 15     | 1      | 0      | 1.587771                | -0.852260 | 0.345443  |  |
| 16     | 8      | 0      | 1.952299                | -1.713037 | 0.748674  |  |
| 17     | 1      | 0      | 2.700652                | -1.434461 | 1.313807  |  |
| 18     | 1      | 0      | 2.706877                | -2.407177 | -0.567744 |  |
| 19     | 8      | 0      | 3.249789                | -2.785737 | -1.325315 |  |
| 20     | 1      | 0      | 3.390337                | -2.037032 | -1.927494 |  |
| 21     | 1      | 0      | 4.767183                | -3.037333 | -0.478314 |  |
| 22     | 8      | 0      | 5.544084                | -3.023980 | 0.142972  |  |
| 23     | 1      | 0      | 5.564892                | -3.901335 | 0.552826  |  |
| 24     | 1      | 0      | 1.612379                | -3.375996 | -2.394466 |  |
| 25     | 8      | 0      | 0.918694                | -3.204272 | -3.058986 |  |
| 26     | 1      | 0      | 0.050873                | -3.504101 | -2.664685 |  |
| 27     | 1      | 0      | 0.661174                | -1.532679 | -3.126138 |  |
| 28     | 8      | 0      | 0.461399                | -0.551175 | -3.066459 |  |
| 29     | 1      | 0      | 0.752093                | -0.153017 | -3.899660 |  |
| 30     | 1      | 0      | 5.065508                | -1.649753 | 1.162312  |  |
| 31     | 8      | 0      | 4.574746                | -0.895313 | 1.578999  |  |
| 32     | 1      | 0      | 5.059210                | -0.636911 | 2.376590  |  |
| 33     | 1      | 0      | -1.776876               | -0.345121 | -0.967672 |  |
| 34     | 8      | 0      | -2.108694               | -0.773240 | -1.803528 |  |
| 35     | 1      | 0      | -1.432968               | -0.526168 | -2.465828 |  |
| 36     | 1      | 0      | -1.815175               | -2.628230 | -2.039072 |  |

|    |   |   |           |           |           |
|----|---|---|-----------|-----------|-----------|
| 37 | 8 | 0 | -1.576407 | -3.579154 | -2.121011 |
| 38 | 1 | 0 | -1.869970 | -3.937887 | -1.248433 |
| 39 | 1 | 0 | -3.831575 | -1.515954 | -1.181114 |
| 40 | 8 | 0 | -4.464323 | -2.010375 | -0.624051 |
| 41 | 1 | 0 | -4.860708 | -1.346189 | -0.014687 |
| 42 | 1 | 0 | -0.847662 | -1.064812 | 1.165701  |
| 43 | 8 | 0 | -0.733012 | -1.960657 | 1.595774  |
| 44 | 1 | 0 | 0.223355  | -2.144736 | 1.488287  |
| 45 | 1 | 0 | -1.656867 | -1.836059 | 3.101483  |
| 46 | 8 | 0 | -2.343048 | -1.621517 | 3.782176  |
| 47 | 1 | 0 | -3.046979 | -2.270386 | 3.628954  |
| 48 | 1 | 0 | -1.944807 | -3.214478 | 0.852215  |
| 49 | 8 | 0 | -2.601781 | -3.826397 | 0.454936  |
| 50 | 1 | 0 | -3.353363 | -3.247451 | 0.179614  |
| 51 | 1 | 0 | 2.816465  | 1.024139  | -0.349095 |
| 52 | 8 | 0 | 3.769296  | 1.284433  | -0.214281 |
| 53 | 1 | 0 | 4.141875  | 0.590024  | 0.364135  |
| 54 | 1 | 0 | 3.527289  | 2.751943  | 0.736901  |
| 55 | 8 | 0 | 3.220396  | 3.527803  | 1.273584  |
| 56 | 1 | 0 | 3.423512  | 4.310456  | 0.741796  |
| 57 | 1 | 0 | -2.912549 | -0.008539 | 2.964230  |
| 58 | 8 | 0 | -3.161896 | 0.718587  | 2.350330  |
| 59 | 1 | 0 | -2.434337 | 0.745699  | 1.680167  |
| 60 | 1 | 0 | -4.616935 | 0.249836  | 1.616685  |
| 61 | 8 | 0 | -5.448266 | -0.072571 | 1.162537  |
| 62 | 1 | 0 | -5.847773 | 0.712152  | 0.760954  |
| 63 | 6 | 0 | 0.227862  | 4.115941  | -2.418266 |
| 64 | 6 | 0 | -1.101764 | 4.343406  | -2.779777 |
| 65 | 1 | 0 | -2.583159 | 2.052290  | -0.741269 |
| 66 | 1 | 0 | -3.152852 | 3.764280  | -2.447800 |
| 67 | 1 | 0 | 1.577652  | 2.972046  | -1.194422 |
| 68 | 1 | 0 | 1.026415  | 4.686340  | -2.887611 |
| 69 | 1 | 0 | -1.345600 | 5.092438  | -3.529757 |
| 70 | 1 | 0 | 1.720521  | 2.865998  | 3.576164  |
| 71 | 1 | 0 | -0.009187 | 2.785962  | 3.980437  |
| 72 | 1 | 0 | 1.125183  | 1.611812  | 4.686197  |

-----  
SCF Done: E(RB+HF-LYP) = -1778.52641035 A.U. after 1 cycles

Conv = 0.4358D-08 -V/T = 2.0093

S\*\*2 = 0.0000

Zero-point correction= 0.608558 (a.u.)  
Thermal correction to Energy= 0.659034  
Thermal correction to Enthalpy= 0.659978  
Thermal correction to Gibbs Free Energy= 0.521684  
Sum of electronic and zero-point Energies= -1777.917853  
Sum of electronic and thermal Energies= -1777.867376

Sum of electronic and thermal Enthalpies= -1777.866432  
 Sum of electronic and thermal Free Energies= -1778.004727

(4-3) Anionic tetrahedral intermediate, Ph-C(-O-)(OH)-NHEt.  
 and (H2O)16, Int1(am)

tuka02bz.for.chk Stoichiometry C9H44NO18(1-)

Standard orientation:

| -----  |        |        |                         |           |           |  |
|--------|--------|--------|-------------------------|-----------|-----------|--|
| Center | Atomic | Atomic | Coordinates (Angstroms) |           |           |  |
| Number | Number | Type   | X                       | Y         | Z         |  |
| -----  |        |        |                         |           |           |  |
| 1      | 6      | 0      | -2.067584               | 1.034754  | -1.070918 |  |
| 2      | 6      | 0      | -2.457612               | -0.414114 | -0.686843 |  |
| 3      | 8      | 0      | -2.751103               | -0.572288 | 0.617198  |  |
| 4      | 7      | 0      | -1.339821               | -1.302903 | -1.096324 |  |
| 5      | 6      | 0      | -1.564909               | -2.744696 | -0.866782 |  |
| 6      | 6      | 0      | -1.958955               | 2.030089  | -0.094613 |  |
| 7      | 6      | 0      | -1.587899               | 3.333692  | -0.443703 |  |
| 8      | 6      | 0      | -1.313346               | 3.657355  | -1.774834 |  |
| 9      | 1      | 0      | -1.158577               | -1.155697 | -2.089346 |  |
| 10     | 1      | 0      | -1.673067               | -2.894227 | 0.210747  |  |
| 11     | 1      | 0      | -2.496669               | -3.084170 | -1.339183 |  |
| 12     | 6      | 0      | -0.386642               | -3.560354 | -1.395960 |  |
| 13     | 8      | 0      | -3.599778               | -0.782632 | -1.536658 |  |
| 14     | 1      | 0      | -4.335859               | -0.183612 | -1.296683 |  |
| 15     | 1      | 0      | -5.378808               | -2.690503 | 0.302076  |  |
| 16     | 8      | 0      | -5.720654               | -2.549036 | -0.617186 |  |
| 17     | 1      | 0      | -4.911031               | -2.289241 | -1.103936 |  |
| 18     | 1      | 0      | 0.107994                | -0.783608 | -0.169393 |  |
| 19     | 8      | 0      | 0.835107                | -0.456274 | 0.447240  |  |
| 20     | 1      | 0      | 0.371427                | -0.359323 | 1.313565  |  |
| 21     | 1      | 0      | 2.526871                | -1.109194 | 0.402407  |  |
| 22     | 8      | 0      | 3.497338                | -1.101165 | 0.233204  |  |
| 23     | 1      | 0      | 3.952325                | -1.864076 | 0.668396  |  |
| 24     | 1      | 0      | -6.279761               | -0.891325 | -0.528003 |  |
| 25     | 8      | 0      | -6.273330               | 0.106477  | -0.530482 |  |
| 26     | 1      | 0      | -7.025452               | 0.389068  | -1.070454 |  |
| 27     | 1      | 0      | -4.077507               | 0.236117  | 1.399659  |  |
| 28     | 8      | 0      | -4.837317               | 0.505058  | 1.982080  |  |
| 29     | 1      | 0      | -5.560743               | 0.655204  | 1.345331  |  |
| 30     | 1      | 0      | 4.178602                | -0.957740 | -1.530744 |  |
| 31     | 8      | 0      | 4.768583                | -0.704682 | -2.272788 |  |
| 32     | 1      | 0      | 4.684572                | 0.275613  | -2.284350 |  |
| 33     | 1      | 0      | 4.310649                | 0.350994  | 0.782877  |  |
| 34     | 8      | 0      | 4.874743                | 1.136011  | 1.013423  |  |
| 35     | 1      | 0      | 4.292906                | 1.732146  | 1.540572  |  |



|    |   |   |           |           |           |
|----|---|---|-----------|-----------|-----------|
| 36 | 1 | 0 | -3.673658 | -1.917405 | 1.315724  |
| 37 | 8 | 0 | -4.372549 | -2.428948 | 1.802795  |
| 38 | 1 | 0 | -4.831264 | -1.710639 | 2.278351  |
| 39 | 1 | 0 | 6.335458  | 0.311650  | 1.476782  |
| 40 | 8 | 0 | 7.073155  | -0.345797 | 1.586263  |
| 41 | 1 | 0 | 7.803916  | 0.129573  | 2.006959  |
| 42 | 1 | 0 | 6.287328  | -1.409699 | -1.522286 |
| 43 | 8 | 0 | 6.943310  | -1.857370 | -0.932353 |
| 44 | 1 | 0 | 7.203696  | -1.183599 | -0.274887 |
| 45 | 1 | 0 | -1.087765 | -1.005513 | 3.122527  |
| 46 | 8 | 0 | -1.003326 | -0.241127 | 2.532190  |
| 47 | 1 | 0 | -1.675592 | -0.395624 | 1.783945  |
| 48 | 1 | 0 | -2.136801 | 1.222803  | 3.368597  |
| 49 | 8 | 0 | -2.813242 | 1.884631  | 3.610345  |
| 50 | 1 | 0 | -3.634275 | 1.560642  | 3.188606  |
| 51 | 1 | 0 | 4.674528  | 1.896816  | -0.759697 |
| 52 | 8 | 0 | 4.278766  | 2.033619  | -1.647049 |
| 53 | 1 | 0 | 3.321465  | 2.081946  | -1.451292 |
| 54 | 1 | 0 | 0.815768  | 2.517386  | -0.649988 |
| 55 | 8 | 0 | 1.618305  | 2.050728  | -0.358979 |
| 56 | 1 | 0 | 1.313988  | 1.132913  | -0.118258 |
| 57 | 6 | 0 | -1.819063 | 1.377674  | -2.409636 |
| 58 | 6 | 0 | -1.435777 | 2.672038  | -2.760064 |
| 59 | 1 | 0 | -2.169131 | 1.795320  | 0.942208  |
| 60 | 1 | 0 | -1.517779 | 4.092297  | 0.331583  |
| 61 | 1 | 0 | -1.020490 | 4.668824  | -2.045106 |
| 62 | 1 | 0 | -1.944369 | 0.629505  | -3.188135 |
| 63 | 1 | 0 | -1.238319 | 2.914074  | -3.801278 |
| 64 | 1 | 0 | -0.262775 | -3.428882 | -2.478911 |
| 65 | 1 | 0 | 0.551677  | -3.267257 | -0.912802 |
| 66 | 1 | 0 | -0.549644 | -4.627742 | -1.209502 |
| 67 | 1 | 0 | 2.344756  | 2.656711  | 1.166887  |
| 68 | 8 | 0 | 2.873671  | 2.809113  | 1.989543  |
| 69 | 1 | 0 | 2.291095  | 2.561152  | 2.722928  |
| 70 | 1 | 0 | 5.887994  | -2.246807 | 1.778406  |
| 71 | 8 | 0 | 5.406533  | -2.838816 | 1.172905  |
| 72 | 1 | 0 | 5.926085  | -2.733198 | 0.335964  |

-----  
SCF Done: E(RB+HF-LYP) = -1778.53261788 A.U. after 1 cycles

Conv = 0.3824D-08 -V/T = 2.0093

S\*\*2 = 0.0000

Zero-point correction= 0.609918 (a.u.)

Thermal correction to Energy= 0.660861

Thermal correction to Enthalpy= 0.661805

Thermal correction to Gibbs Free Energy= 0.520198

Sum of electronic and zero-point Energies= -1777.922699

Sum of electronic and thermal Energies= -1777.871757  
 Sum of electronic and thermal Enthalpies= -1777.870813  
 Sum of electronic and thermal Free Energies= -1778.012420

(4-4) TS2(am) toward the zwitterion  
 tuka02bz.chk Stoichiometry C9H44NO18(1-)  
 Standard orientation:

| -----  |        |        |                         |           |           |  |
|--------|--------|--------|-------------------------|-----------|-----------|--|
| Center | Atomic | Atomic | Coordinates (Angstroms) |           |           |  |
| Number | Number | Type   | X                       | Y         | Z         |  |
| -----  |        |        |                         |           |           |  |
| 1      | 6      | 0      | -1.426006               | 0.980577  | -0.999213 |  |
| 2      | 6      | 0      | -1.786729               | -0.421078 | -0.455536 |  |
| 3      | 8      | 0      | -2.578588               | -0.402326 | 0.624639  |  |
| 4      | 7      | 0      | -0.478914               | -1.140013 | -0.117061 |  |
| 5      | 6      | 0      | -0.683466               | -2.536538 | 0.362438  |  |
| 6      | 6      | 0      | -1.793698               | 2.134399  | -0.299002 |  |
| 7      | 6      | 0      | -1.486990               | 3.401563  | -0.806915 |  |
| 8      | 6      | 0      | -0.800916               | 3.527668  | -2.017650 |  |
| 9      | 1      | 0      | 0.146908                | -1.152380 | -0.931889 |  |
| 10     | 1      | 0      | -1.229858               | -2.469040 | 1.305768  |  |
| 11     | 1      | 0      | -1.318884               | -3.057636 | -0.358032 |  |
| 12     | 6      | 0      | 0.638982                | -3.273683 | 0.554122  |  |
| 13     | 8      | 0      | -2.330426               | -1.200880 | -1.535684 |  |
| 14     | 1      | 0      | -3.236708               | -0.863874 | -1.702930 |  |
| 15     | 1      | 0      | -5.100238               | -2.891886 | -0.082925 |  |
| 16     | 8      | 0      | -5.417161               | -3.143475 | -0.999782 |  |
| 17     | 1      | 0      | -4.687202               | -3.655178 | -1.380562 |  |
| 18     | 1      | 0      | 0.104738                | -0.493688 | 0.726444  |  |
| 19     | 8      | 0      | 0.785877                | 0.223401  | 1.602588  |  |
| 20     | 1      | 0      | 0.183983                | 0.404241  | 2.348025  |  |
| 21     | 1      | 0      | 2.305833                | -0.405076 | 1.595610  |  |
| 22     | 8      | 0      | 3.196585                | -0.637142 | 1.184077  |  |
| 23     | 1      | 0      | 3.591935                | -1.460900 | 1.547352  |  |
| 24     | 1      | 0      | -5.366391               | -1.536602 | -1.685492 |  |
| 25     | 8      | 0      | -5.151141               | -0.597555 | -1.936673 |  |
| 26     | 1      | 0      | -5.473203               | -0.469080 | -2.840633 |  |
| 27     | 1      | 0      | -4.132038               | 0.364554  | 0.633142  |  |
| 28     | 8      | 0      | -5.085576               | 0.608137  | 0.784389  |  |
| 29     | 1      | 0      | -5.468738               | 0.543553  | -0.108618 |  |
| 30     | 1      | 0      | 2.633217                | -1.020960 | -0.508125 |  |
| 31     | 8      | 0      | 2.440339                | -1.152233 | -1.467662 |  |
| 32     | 1      | 0      | 2.620638                | -0.252755 | -1.835051 |  |
| 33     | 1      | 0      | 4.336556                | 0.538531  | 0.680169  |  |
| 34     | 8      | 0      | 5.009973                | 1.148281  | 0.273406  |  |
| 35     | 1      | 0      | 4.880657                | 2.000778  | 0.750307  |  |

|    |   |   |           |           |           |
|----|---|---|-----------|-----------|-----------|
| 36 | 1 | 0 | -3.658976 | -1.720010 | 1.057869  |
| 37 | 8 | 0 | -4.488674 | -2.189139 | 1.350947  |
| 38 | 1 | 0 | -5.084270 | -1.427532 | 1.496466  |
| 39 | 1 | 0 | 6.254229  | -0.054466 | 0.013515  |
| 40 | 8 | 0 | 6.733955  | -0.909165 | -0.145561 |
| 41 | 1 | 0 | 7.609123  | -0.669561 | -0.482678 |
| 42 | 1 | 0 | 3.978844  | -2.230211 | -1.588311 |
| 43 | 8 | 0 | 4.800639  | -2.731836 | -1.372881 |
| 44 | 1 | 0 | 5.492576  | -2.053099 | -1.241742 |
| 45 | 1 | 0 | -2.145580 | -0.140940 | 3.660184  |
| 46 | 8 | 0 | -1.856804 | 0.530201  | 3.023786  |
| 47 | 1 | 0 | -2.086228 | 0.156068  | 2.120884  |
| 48 | 1 | 0 | -3.310854 | 1.904746  | 3.021787  |
| 49 | 8 | 0 | -4.097240 | 2.466401  | 2.867742  |
| 50 | 1 | 0 | -4.612551 | 1.983963  | 2.192251  |
| 51 | 1 | 0 | 3.929226  | 1.470476  | -1.318630 |
| 52 | 8 | 0 | 3.104753  | 1.538949  | -1.845956 |
| 53 | 1 | 0 | 2.466792  | 1.898178  | -1.189394 |
| 54 | 1 | 0 | 0.805915  | 2.919446  | 0.168080  |
| 55 | 8 | 0 | 1.600155  | 2.429492  | 0.438460  |
| 56 | 1 | 0 | 1.252221  | 1.590785  | 0.911587  |
| 57 | 6 | 0 | -0.751043 | 1.117312  | -2.220945 |
| 58 | 6 | 0 | -0.432870 | 2.379110  | -2.724060 |
| 59 | 1 | 0 | -2.325836 | 2.048201  | 0.641008  |
| 60 | 1 | 0 | -1.793901 | 4.285767  | -0.253776 |
| 61 | 1 | 0 | -0.558021 | 4.512018  | -2.410395 |
| 62 | 1 | 0 | -0.481563 | 0.230058  | -2.786635 |
| 63 | 1 | 0 | 0.104183  | 2.464446  | -3.664766 |
| 64 | 1 | 0 | 1.202412  | -3.341508 | -0.382170 |
| 65 | 1 | 0 | 1.271665  | -2.778389 | 1.296602  |
| 66 | 1 | 0 | 0.438730  | -4.292206 | 0.905971  |
| 67 | 1 | 0 | 3.026573  | 3.148059  | 1.171342  |
| 68 | 8 | 0 | 3.914585  | 3.386642  | 1.547680  |
| 69 | 1 | 0 | 3.812637  | 3.296255  | 2.506525  |
| 70 | 1 | 0 | 5.704698  | -2.335997 | 1.422046  |
| 71 | 8 | 0 | 4.876556  | -2.846946 | 1.428272  |
| 72 | 1 | 0 | 4.743094  | -3.029493 | 0.465511  |

-----  
SCF Done: E(RB+HF-LYP) = -1778.52293385 A.U. after 1 cycles

Conv = 0.7811D-09 -V/T = 2.0093

S\*\*2 = 0.0000

Zero-point correction= 0.605542 (a.u.)

Thermal correction to Energy= 0.655730

Thermal correction to Enthalpy= 0.656674

Thermal correction to Gibbs Free Energy= 0.517388

Sum of electronic and zero-point Energies= -1777.917392

Sum of electronic and thermal Energies= -1777.867204  
 Sum of electronic and thermal Enthalpies= -1777.866260  
 Sum of electronic and thermal Free Energies= -1778.005546

(4-5) Zwitterion(Mulliken CT complex), Ph-C(-O-)(OH)NH2(+)(Et,  
 and OH-(H2O)15. Int2(am)

tukats3a.rev.chk Stoichiometry C9H44NO18(1-)

Standard orientation:

| Center<br>Number | Atomic<br>Number | Atomic<br>Type | Coordinates (Angstroms) |           |           |
|------------------|------------------|----------------|-------------------------|-----------|-----------|
|                  |                  |                | X                       | Y         | Z         |
| 1                | 6                | 0              | -2.439399               | 1.804122  | -0.099189 |
| 2                | 6                | 0              | -1.805413               | 0.408481  | -0.212268 |
| 3                | 8                | 0              | -2.610018               | -0.607732 | -0.040179 |
| 4                | 7                | 0              | -0.630464               | 0.343444  | 0.957058  |
| 5                | 6                | 0              | -1.098495               | 0.232628  | 2.371488  |
| 6                | 6                | 0              | -3.644497               | 1.958688  | 0.595504  |
| 7                | 6                | 0              | -4.234641               | 3.217784  | 0.725993  |
| 8                | 6                | 0              | -3.630560               | 4.339123  | 0.156600  |
| 9                | 1                | 0              | -0.072267               | -0.501527 | 0.734281  |
| 10               | 6                | 0              | -1.047097               | 1.555605  | 3.130421  |
| 11               | 1                | 0              | -2.112525               | -0.173727 | 2.334463  |
| 12               | 1                | 0              | -0.464471               | -0.511673 | 2.862654  |
| 13               | 8                | 0              | -1.006667               | 0.357775  | -1.382329 |
| 14               | 1                | 0              | -1.031312               | -0.562879 | -1.744583 |
| 15               | 1                | 0              | -0.983017               | -3.888192 | -0.249569 |
| 16               | 8                | 0              | -0.150609               | -3.838334 | -0.782471 |
| 17               | 1                | 0              | 0.437292                | -3.257086 | -0.243265 |
| 18               | 1                | 0              | 0.019543                | 1.143325  | 0.841618  |
| 19               | 8                | 0              | 1.394248                | 2.432852  | 0.601870  |
| 20               | 1                | 0              | 1.347030                | 3.349900  | 0.908154  |
| 21               | 1                | 0              | 2.361464                | 2.077250  | 0.814268  |
| 22               | 8                | 0              | 3.698809                | 1.471961  | 0.917096  |
| 23               | 1                | 0              | 3.957164                | 1.217365  | 1.815208  |
| 24               | 1                | 0              | -0.629643               | -2.839024 | -2.015457 |
| 25               | 8                | 0              | -0.965143               | -2.143753 | -2.666242 |
| 26               | 1                | 0              | -0.343526               | -2.142034 | -3.409337 |
| 27               | 1                | 0              | -3.493702               | -1.155630 | -1.601154 |
| 28               | 8                | 0              | -3.803842               | -1.702491 | -2.360126 |
| 29               | 1                | 0              | -2.960709               | -2.029990 | -2.730495 |
| 30               | 1                | 0              | 3.437160                | 0.068180  | 0.046822  |
| 31               | 8                | 0              | 3.341487                | -0.741925 | -0.546401 |
| 32               | 1                | 0              | 3.469619                | -0.379954 | -1.458860 |
| 33               | 1                | 0              | 4.868659                | 1.772490  | 0.020420  |
| 34               | 8                | 0              | 5.632218                | 1.843832  | -0.687297 |

|    |   |   |           |           |           |
|----|---|---|-----------|-----------|-----------|
| 35 | 1 | 0 | 5.981229  | 2.745193  | -0.629437 |
| 36 | 1 | 0 | -2.370908 | -2.404604 | 0.390872  |
| 37 | 8 | 0 | -2.465558 | -3.354095 | 0.637227  |
| 38 | 1 | 0 | -3.299123 | -3.628403 | 0.184618  |
| 39 | 1 | 0 | 6.706300  | 0.558896  | -0.047308 |
| 40 | 8 | 0 | 7.236388  | -0.196509 | 0.314579  |
| 41 | 1 | 0 | 7.598542  | -0.640839 | -0.466479 |
| 42 | 1 | 0 | 4.595053  | -1.755855 | 0.207658  |
| 43 | 8 | 0 | 5.202075  | -2.170996 | 0.870406  |
| 44 | 1 | 0 | 5.946586  | -1.533775 | 0.923446  |
| 45 | 1 | 0 | 1.926312  | -1.499256 | 0.084800  |
| 46 | 8 | 0 | 1.236974  | -1.905278 | 0.676218  |
| 47 | 1 | 0 | 1.769251  | -2.214986 | 1.447224  |
| 48 | 1 | 0 | 3.169771  | -3.684279 | 2.687454  |
| 49 | 8 | 0 | 3.155179  | -2.719537 | 2.602125  |
| 50 | 1 | 0 | 3.978807  | -2.495571 | 2.089696  |
| 51 | 1 | 0 | -4.270579 | -2.144786 | 1.977319  |
| 52 | 8 | 0 | -4.768049 | -1.448459 | 1.517138  |
| 53 | 1 | 0 | -4.074084 | -1.011088 | 0.967491  |
| 54 | 1 | 0 | -5.299009 | -2.826525 | 0.046972  |
| 55 | 8 | 0 | -5.004541 | -3.503190 | -0.595078 |
| 56 | 1 | 0 | -4.696887 | -2.972163 | -1.369433 |
| 57 | 1 | 0 | 4.472357  | 1.337700  | -2.231239 |
| 58 | 8 | 0 | 3.803508  | 0.847094  | -2.752654 |
| 59 | 1 | 0 | 2.957713  | 1.346755  | -2.656605 |
| 60 | 1 | 0 | 0.593392  | 1.406064  | -2.162363 |
| 61 | 8 | 0 | 1.319685  | 2.059209  | -2.171783 |
| 62 | 1 | 0 | 1.415886  | 2.280865  | -1.215600 |
| 63 | 6 | 0 | -1.843370 | 2.932940  | -0.678640 |
| 64 | 6 | 0 | -2.435384 | 4.190426  | -0.549770 |
| 65 | 1 | 0 | -4.128990 | 1.090792  | 1.027902  |
| 66 | 1 | 0 | -5.172899 | 3.315855  | 1.266443  |
| 67 | 1 | 0 | -4.091689 | 5.319233  | 0.253703  |
| 68 | 1 | 0 | -0.924492 | 2.830670  | -1.243650 |
| 69 | 1 | 0 | -1.963338 | 5.053211  | -1.013537 |
| 70 | 1 | 0 | -0.021877 | 1.936282  | 3.188837  |
| 71 | 1 | 0 | -1.674326 | 2.316054  | 2.657079  |
| 72 | 1 | 0 | -1.412527 | 1.401489  | 4.151947  |

-----  
SCF Done: E(RB3LYP) = -1778.53687506 A.U. after 1 cycles

Convq = 0.1842D-08 -V/T = 2.0093

Zero-point correction= 0.610433 (a.u.)

Thermal correction to Energy= 0.660107

Thermal correction to Enthalpy= 0.661051

Thermal correction to Gibbs Free Energy= 0.525179

Sum of electronic and zero-point Energies= -1777.926443

Sum of electronic and thermal Energies= -1777.876768  
 Sum of electronic and thermal Enthalpies= -1777.875824  
 Sum of electronic and thermal Free Energies= -1778.011696

(4-6) TS3(am) separation TS to Ph-COOH, Et-NH2 and OH-  
 tukats3a.chk Stoichiometry C9H44NO18(1-)

Standard orientation:

| -----  |        |        |                         |           |           |  |
|--------|--------|--------|-------------------------|-----------|-----------|--|
| Center | Atomic | Atomic | Coordinates (Angstroms) |           |           |  |
| Number | Number | Type   | X                       | Y         | Z         |  |
| -----  |        |        |                         |           |           |  |
| 1      | 6      | 0      | -2.513671               | 1.819091  | -0.178684 |  |
| 2      | 6      | 0      | -1.966925               | 0.418312  | -0.360133 |  |
| 3      | 8      | 0      | -2.720371               | -0.582303 | -0.123813 |  |
| 4      | 7      | 0      | -0.629241               | 0.383448  | 1.084708  |  |
| 5      | 6      | 0      | -1.153917               | 0.268281  | 2.461286  |  |
| 6      | 6      | 0      | -3.683180               | 2.001384  | 0.570112  |  |
| 7      | 6      | 0      | -4.215926               | 3.278310  | 0.752941  |  |
| 8      | 6      | 0      | -3.590474               | 4.387951  | 0.182828  |  |
| 9      | 1      | 0      | -0.074423               | -0.453199 | 0.863533  |  |
| 10     | 6      | 0      | -1.149938               | 1.598687  | 3.211385  |  |
| 11     | 1      | 0      | -2.172414               | -0.134145 | 2.389371  |  |
| 12     | 1      | 0      | -0.558551               | -0.471381 | 3.009646  |  |
| 13     | 8      | 0      | -1.088145               | 0.339309  | -1.415207 |  |
| 14     | 1      | 0      | -1.002760               | -0.606027 | -1.713894 |  |
| 15     | 1      | 0      | -0.969490               | -3.864083 | -0.055178 |  |
| 16     | 8      | 0      | -0.123257               | -3.832883 | -0.565790 |  |
| 17     | 1      | 0      | 0.473401                | -3.263800 | -0.017171 |  |
| 18     | 1      | 0      | 0.004259                | 1.187539  | 0.979171  |  |
| 19     | 8      | 0      | 1.439013                | 2.546970  | 0.605852  |  |
| 20     | 1      | 0      | 1.436917                | 3.473525  | 0.885975  |  |
| 21     | 1      | 0      | 2.389355                | 2.169022  | 0.809865  |  |
| 22     | 8      | 0      | 3.741225                | 1.523162  | 0.907582  |  |
| 23     | 1      | 0      | 4.015212                | 1.287882  | 1.806255  |  |
| 24     | 1      | 0      | -0.515298               | -2.863368 | -1.811753 |  |
| 25     | 8      | 0      | -0.815801               | -2.187074 | -2.506587 |  |
| 26     | 1      | 0      | -0.144656               | -2.196333 | -3.205691 |  |
| 27     | 1      | 0      | -3.486853               | -1.335607 | -1.757061 |  |
| 28     | 8      | 0      | -3.680806               | -1.960538 | -2.487041 |  |
| 29     | 1      | 0      | -2.783286               | -2.247979 | -2.749569 |  |
| 30     | 1      | 0      | 3.434517                | 0.106323  | 0.085399  |  |
| 31     | 8      | 0      | 3.321311                | -0.711812 | -0.495623 |  |
| 32     | 1      | 0      | 3.429723                | -0.361084 | -1.414174 |  |
| 33     | 1      | 0      | 4.879883                | 1.796021  | -0.009280 |  |
| 34     | 8      | 0      | 5.627796                | 1.860010  | -0.742812 |  |
| 35     | 1      | 0      | 5.975612                | 2.762952  | -0.707332 |  |

|    |   |   |           |           |           |
|----|---|---|-----------|-----------|-----------|
| 36 | 1 | 0 | -2.443574 | -2.395990 | 0.459412  |
| 37 | 8 | 0 | -2.514216 | -3.334071 | 0.736616  |
| 38 | 1 | 0 | -3.315480 | -3.658759 | 0.258736  |
| 39 | 1 | 0 | 6.733878  | 0.586757  | -0.160375 |
| 40 | 8 | 0 | 7.289343  | -0.169217 | 0.161965  |
| 41 | 1 | 0 | 7.610919  | -0.599727 | -0.644183 |
| 42 | 1 | 0 | 4.626476  | -1.715883 | 0.172523  |
| 43 | 8 | 0 | 5.283023  | -2.153942 | 0.770787  |
| 44 | 1 | 0 | 6.028244  | -1.515833 | 0.797256  |
| 45 | 1 | 0 | 1.967282  | -1.526632 | 0.226403  |
| 46 | 8 | 0 | 1.325827  | -1.962898 | 0.845983  |
| 47 | 1 | 0 | 1.907124  | -2.278322 | 1.576964  |
| 48 | 1 | 0 | 3.413686  | -3.788784 | 2.644919  |
| 49 | 8 | 0 | 3.382971  | -2.820986 | 2.622363  |
| 50 | 1 | 0 | 4.161546  | -2.554759 | 2.062438  |
| 51 | 1 | 0 | -4.586548 | -2.005617 | 1.883658  |
| 52 | 8 | 0 | -5.032543 | -1.422184 | 1.248503  |
| 53 | 1 | 0 | -4.286237 | -0.990628 | 0.773155  |
| 54 | 1 | 0 | -5.314818 | -2.937894 | -0.099118 |
| 55 | 8 | 0 | -4.948318 | -3.661463 | -0.646953 |
| 56 | 1 | 0 | -4.609827 | -3.201788 | -1.451038 |
| 57 | 1 | 0 | 4.438776  | 1.336036  | -2.232233 |
| 58 | 8 | 0 | 3.751484  | 0.852229  | -2.737070 |
| 59 | 1 | 0 | 2.917252  | 1.367254  | -2.627638 |
| 60 | 1 | 0 | 0.574392  | 1.426560  | -2.122290 |
| 61 | 8 | 0 | 1.283371  | 2.095564  | -2.134774 |
| 62 | 1 | 0 | 1.385132  | 2.327703  | -1.179144 |
| 63 | 6 | 0 | -1.895039 | 2.935561  | -0.758150 |
| 64 | 6 | 0 | -2.431779 | 4.210483  | -0.576008 |
| 65 | 1 | 0 | -4.181768 | 1.142086  | 1.004018  |
| 66 | 1 | 0 | -5.125847 | 3.400936  | 1.334943  |
| 67 | 1 | 0 | -4.006903 | 5.382810  | 0.321817  |
| 68 | 1 | 0 | -0.998598 | 2.812402  | -1.353724 |
| 69 | 1 | 0 | -1.943522 | 5.065690  | -1.036497 |
| 70 | 1 | 0 | -0.128430 | 1.978296  | 3.326563  |
| 71 | 1 | 0 | -1.740279 | 2.355491  | 2.685784  |
| 72 | 1 | 0 | -1.579493 | 1.466835  | 4.211249  |

-----  
SCF Done: E(RB+HF-LYP) = -1778.53528511 A.U. after 1 cycles

Convg = 0.3375D-08 -V/T = 2.0093

S\*\*2 = 0.0000

Zero-point correction= 0.608607 (a.u.)

Thermal correction to Energy= 0.658437

Thermal correction to Enthalpy= 0.659381

Thermal correction to Gibbs Free Energy= 0.522666

Sum of electronic and zero-point Energies= -1777.926678

Sum of electronic and thermal Energies= -1777.876848  
 Sum of electronic and thermal Enthalpies= -1777.875904  
 Sum of electronic and thermal Free Energies= -1778.012620

(4-7) Ph-COOH, H2N-Et and OH-(H2O)15

after the separation TS, Int3(am)

tukats3a.for.chk Stoichiometry C9H44NO18(1-)

Standard orientation:

| Center<br>Number | Atomic<br>Number | Atomic<br>Type | Coordinates (Angstroms) |           |           |
|------------------|------------------|----------------|-------------------------|-----------|-----------|
|                  |                  |                | X                       | Y         | Z         |
| 1                | 6                | 0              | 3.924412                | -1.742043 | -0.374241 |
| 2                | 6                | 0              | 3.267864                | -0.455164 | -0.734334 |
| 3                | 8                | 0              | 3.688204                | 0.632796  | -0.343246 |
| 4                | 7                | 0              | -0.336771               | 1.284013  | 2.085206  |
| 5                | 6                | 0              | -0.860941               | 1.672280  | 3.406744  |
| 6                | 6                | 0              | 5.037708                | -1.694749 | 0.478207  |
| 7                | 6                | 0              | 5.696233                | -2.868347 | 0.833525  |
| 8                | 6                | 0              | 5.248095                | -4.096867 | 0.339740  |
| 9                | 1                | 0              | -0.981298               | 1.612875  | 1.359543  |
| 10               | 6                | 0              | 0.060939                | 1.195532  | 4.527877  |
| 11               | 1                | 0              | -0.931714               | 2.766911  | 3.429201  |
| 12               | 1                | 0              | -1.878618               | 1.284969  | 3.576594  |
| 13               | 8                | 0              | 2.194494                | -0.576538 | -1.521526 |
| 14               | 1                | 0              | 1.840929                | 0.326904  | -1.806814 |
| 15               | 1                | 0              | -0.451264               | 4.032268  | -1.542706 |
| 16               | 8                | 0              | -0.737261               | 3.180852  | -1.959029 |
| 17               | 1                | 0              | -1.386547               | 2.773701  | -1.327342 |
| 18               | 1                | 0              | -0.330828               | 0.261600  | 2.013912  |
| 19               | 8                | 0              | -0.626344               | -1.891677 | 1.820171  |
| 20               | 1                | 0              | -0.358941               | -2.536210 | 2.491310  |
| 21               | 1                | 0              | -1.658275               | -1.937858 | 1.771885  |
| 22               | 8                | 0              | -3.170471               | -1.998656 | 1.510605  |
| 23               | 1                | 0              | -3.719446               | -1.582639 | 2.191129  |
| 24               | 1                | 0              | 0.487836                | 2.254846  | -2.269917 |
| 25               | 8                | 0              | 1.293145                | 1.702913  | -2.589924 |
| 26               | 1                | 0              | 1.116367                | 1.526786  | -3.526950 |
| 27               | 1                | 0              | 3.931374                | 2.407320  | -1.303127 |
| 28               | 8                | 0              | 3.646788                | 3.162338  | -1.850509 |
| 29               | 1                | 0              | 2.819417                | 2.821185  | -2.250833 |
| 30               | 1                | 0              | -3.173111               | -1.014196 | 0.165878  |
| 31               | 8                | 0              | -3.181790               | -0.538837 | -0.724611 |
| 32               | 1                | 0              | -2.889147               | -1.234570 | -1.363434 |
| 33               | 1                | 0              | -3.877423               | -3.043325 | 0.742392  |
| 34               | 8                | 0              | -4.330733               | -3.710513 | 0.064125  |



|    |   |   |           |           |           |
|----|---|---|-----------|-----------|-----------|
| 35 | 1 | 0 | -4.353351 | -4.574994 | 0.499400  |
| 36 | 1 | 0 | -0.436796 | 5.700328  | 0.068011  |
| 37 | 8 | 0 | 0.118500  | 5.507836  | -0.701655 |
| 38 | 1 | 0 | 1.015048  | 5.261702  | -0.328107 |
| 39 | 1 | 0 | -5.908713 | -2.970262 | -0.295293 |
| 40 | 8 | 0 | -6.755150 | -2.517785 | -0.547271 |
| 41 | 1 | 0 | -6.847236 | -2.687712 | -1.496715 |
| 42 | 1 | 0 | -4.873340 | -0.113651 | -0.955290 |
| 43 | 8 | 0 | -5.818435 | 0.186358  | -0.926336 |
| 44 | 1 | 0 | -6.306797 | -0.612659 | -0.634519 |
| 45 | 1 | 0 | -2.585227 | 1.080088  | -0.426619 |
| 46 | 8 | 0 | -2.430988 | 2.018764  | -0.147858 |
| 47 | 1 | 0 | -3.341432 | 2.376718  | -0.032485 |
| 48 | 1 | 0 | -5.447152 | 3.229324  | -0.750018 |
| 49 | 8 | 0 | -5.208695 | 2.674353  | 0.007093  |
| 50 | 1 | 0 | -5.559768 | 1.773120  | -0.224159 |
| 51 | 1 | 0 | 1.299818  | 1.971300  | 1.806679  |
| 52 | 8 | 0 | 2.221753  | 2.361958  | 1.699313  |
| 53 | 1 | 0 | 2.702483  | 1.745805  | 1.119329  |
| 54 | 1 | 0 | 2.366062  | 3.945167  | 0.850669  |
| 55 | 8 | 0 | 2.514017  | 4.722933  | 0.254414  |
| 56 | 1 | 0 | 2.988207  | 4.335883  | -0.516138 |
| 57 | 1 | 0 | -3.038211 | -3.373838 | -1.369577 |
| 58 | 8 | 0 | -2.444360 | -2.899044 | -1.989104 |
| 59 | 1 | 0 | -1.544228 | -2.937416 | -1.588858 |
| 60 | 1 | 0 | 0.568295  | -1.930691 | -1.087328 |
| 61 | 8 | 0 | 0.070827  | -2.685752 | -0.729967 |
| 62 | 1 | 0 | -0.150789 | -2.420098 | 0.200004  |
| 63 | 6 | 0 | 3.476049  | -2.975949 | -0.867362 |
| 64 | 6 | 0 | 4.139910  | -4.148202 | -0.507924 |
| 65 | 1 | 0 | 5.368407  | -0.731039 | 0.850625  |
| 66 | 1 | 0 | 6.556953  | -2.826550 | 1.495544  |
| 67 | 1 | 0 | 5.761319  | -5.013963 | 0.618562  |
| 68 | 1 | 0 | 2.606984  | -3.021359 | -1.511683 |
| 69 | 1 | 0 | 3.784737  | -5.102204 | -0.887095 |
| 70 | 1 | 0 | 0.143660  | 0.101354  | 4.523471  |
| 71 | 1 | 0 | 1.067065  | 1.610497  | 4.405693  |
| 72 | 1 | 0 | -0.327535 | 1.499169  | 5.507872  |

-----  
SCF Done: E(RB+HF-LYP) = -1778.56315896 A.U. after 1 cycles

Conv = 0.7820D-08 -V/T = 2.0094

S\*\*2 = 0.0000

Zero-point correction= 0.606326 (a.u.)

Thermal correction to Energy= 0.657939

Thermal correction to Enthalpy= 0.658883

Thermal correction to Gibbs Free Energy= 0.513262

Sum of electronic and zero-point Energies= -1777.956833  
 Sum of electronic and thermal Energies= -1777.905220  
 Sum of electronic and thermal Enthalpies= -1777.904276  
 Sum of electronic and thermal Free Energies= -1778.049897

(4-8) TS4(am), the last TS leading to the benzoate ion  
 by the proton transfer from HO-

tukats4a.chk Stoichiometry C9H44NO18(1-)

Standard orientation:

| Center<br>Number | Atomic<br>Number | Atomic<br>Type | Coordinates (Angstroms) |           |           |
|------------------|------------------|----------------|-------------------------|-----------|-----------|
|                  |                  |                | X                       | Y         | Z         |
| 1                | 6                | 0              | 2.345740                | 2.904003  | 0.073873  |
| 2                | 6                | 0              | 2.784754                | 1.571736  | 0.601881  |
| 3                | 8                | 0              | 3.427534                | 0.783201  | -0.104275 |
| 4                | 7                | 0              | 0.205785                | -2.618635 | -1.359206 |
| 5                | 6                | 0              | -0.272325               | -3.851730 | -2.012484 |
| 6                | 6                | 0              | 2.756199                | 3.293149  | -1.210105 |
| 7                | 6                | 0              | 2.366539                | 4.529724  | -1.723926 |
| 8                | 6                | 0              | 1.564620                | 5.382876  | -0.959816 |
| 9                | 1                | 0              | -0.174608               | -2.553899 | -0.397622 |
| 10               | 1                | 0              | 0.192092                | -3.912038 | -3.005745 |
| 11               | 1                | 0              | 0.111631                | -4.705034 | -1.440991 |
| 12               | 6                | 0              | -1.795301               | -3.970319 | -2.144287 |
| 13               | 8                | 0              | 2.436005                | 1.347340  | 1.845363  |
| 14               | 1                | 0              | 2.696402                | 0.383167  | 2.206178  |
| 15               | 1                | 0              | 1.899067                | -3.327056 | 1.756263  |
| 16               | 8                | 0              | 1.495008                | -2.739260 | 2.448460  |
| 17               | 1                | 0              | 0.518276                | -2.481606 | 2.055607  |
| 18               | 1                | 0              | -0.184710               | -1.812573 | -1.855398 |
| 19               | 8                | 0              | -1.444181               | -0.126959 | -2.736057 |
| 20               | 1                | 0              | -1.658975               | -0.169579 | -3.678969 |
| 21               | 1                | 0              | -2.293162               | -0.288394 | -2.244397 |
| 22               | 8                | 0              | -3.625144               | -0.312013 | -1.122452 |
| 23               | 1                | 0              | -4.344974               | -0.988387 | -1.069378 |
| 24               | 1                | 0              | 2.252092                | -1.787777 | 2.629016  |
| 25               | 8                | 0              | 3.039462                | -0.903327 | 2.810337  |
| 26               | 1                | 0              | 3.151201                | -0.809447 | 3.768373  |
| 27               | 1                | 0              | 4.889341                | -0.396560 | 0.613178  |
| 28               | 8                | 0              | 5.284294                | -1.102119 | 1.160738  |
| 29               | 1                | 0              | 4.601874                | -1.199663 | 1.865453  |
| 30               | 1                | 0              | -3.112463               | -0.427073 | -0.250000 |
| 31               | 8                | 0              | -2.452380               | -0.432184 | 1.225911  |
| 32               | 1                | 0              | -2.073417               | 0.471233  | 1.303596  |
| 33               | 1                | 0              | -4.303867               | 1.193909  | -0.785750 |

|    |   |   |           |           |           |
|----|---|---|-----------|-----------|-----------|
| 34 | 8 | 0 | -4.625308 | 2.083444  | -0.447026 |
| 35 | 1 | 0 | -4.748410 | 2.651686  | -1.221215 |
| 36 | 1 | 0 | 1.822566  | -3.653953 | -0.345315 |
| 37 | 8 | 0 | 2.383167  | -4.168254 | 0.267959  |
| 38 | 1 | 0 | 3.307788  | -3.934955 | -0.006651 |
| 39 | 1 | 0 | -5.676489 | 1.869844  | 1.011186  |
| 40 | 8 | 0 | -6.119757 | 1.634215  | 1.859031  |
| 41 | 1 | 0 | -5.689791 | 2.182797  | 2.532116  |
| 42 | 1 | 0 | -4.080023 | -0.823164 | 1.931829  |
| 43 | 8 | 0 | -5.042944 | -1.017553 | 2.059081  |
| 44 | 1 | 0 | -5.474733 | -0.136579 | 2.092485  |
| 45 | 1 | 0 | -1.693782 | -1.154835 | 1.352146  |
| 46 | 8 | 0 | -0.746187 | -2.298362 | 1.440836  |
| 47 | 1 | 0 | -1.282795 | -3.032793 | 1.777153  |
| 48 | 1 | 0 | -6.580926 | -1.839322 | -0.562470 |
| 49 | 8 | 0 | -5.654036 | -2.045594 | -0.374326 |
| 50 | 1 | 0 | -5.501242 | -1.756825 | 0.572048  |
| 51 | 1 | 0 | 1.983701  | -1.870298 | -1.728145 |
| 52 | 8 | 0 | 2.845070  | -1.447474 | -1.971965 |
| 53 | 1 | 0 | 2.940545  | -0.680823 | -1.375710 |
| 54 | 1 | 0 | 4.216656  | -2.577344 | -1.313203 |
| 55 | 8 | 0 | 4.756021  | -3.149743 | -0.720271 |
| 56 | 1 | 0 | 5.070716  | -2.528859 | -0.021780 |
| 57 | 1 | 0 | -2.912495 | 2.453905  | 0.487681  |
| 58 | 8 | 0 | -1.996414 | 2.368716  | 0.815051  |
| 59 | 1 | 0 | -1.456345 | 2.416088  | -0.006435 |
| 60 | 1 | 0 | 0.213377  | 2.523123  | -1.693226 |
| 61 | 8 | 0 | -0.747348 | 2.395341  | -1.743774 |
| 62 | 1 | 0 | -0.889808 | 1.496536  | -2.123216 |
| 63 | 6 | 0 | 1.538199  | 3.760647  | 0.835114  |
| 64 | 6 | 0 | 1.150502  | 4.995987  | 0.316779  |
| 65 | 1 | 0 | 3.381584  | 2.617072  | -1.784277 |
| 66 | 1 | 0 | 2.686903  | 4.827438  | -2.718860 |
| 67 | 1 | 0 | 1.256595  | 6.344205  | -1.363279 |
| 68 | 1 | 0 | 1.208734  | 3.443843  | 1.817828  |
| 69 | 1 | 0 | 0.513884  | 5.649983  | 0.905870  |
| 70 | 1 | 0 | -2.278487 | -3.929950 | -1.161617 |
| 71 | 1 | 0 | -2.203817 | -3.150430 | -2.747944 |
| 72 | 1 | 0 | -2.076651 | -4.916923 | -2.625116 |

-----  
SCF Done: E(RB3LYP) = -1778.54304325 A.U. after 1 cycles

Convg = 0.3577D-08 -V/T = 2.0093

Zero-point correction= 0.600546 (a.u.)

Thermal correction to Energy= 0.651295

Thermal correction to Enthalpy= 0.652239

Thermal correction to Gibbs Free Energy= 0.509907

Sum of electronic and zero-point Energies= -1777.942497  
 Sum of electronic and thermal Energies= -1777.891748  
 Sum of electronic and thermal Enthalpies= -1777.890804  
 Sum of electronic and thermal Free Energies= -1778.033136

(4-9) The product, Ph-COO-, H2N-Et and (H2O)16

tukats4a.for.chk Stoichiometry C9H44NO18(1-)

Standard orientation:

| Center<br>Number | Atomic<br>Number | Atomic<br>Type | Coordinates (Angstroms) |           |           |
|------------------|------------------|----------------|-------------------------|-----------|-----------|
|                  |                  |                | X                       | Y         | Z         |
| 1                | 6                | 0              | 3.039785                | 2.600811  | -0.048224 |
| 2                | 6                | 0              | 3.292980                | 1.256315  | 0.619339  |
| 3                | 8                | 0              | 3.808549                | 0.345323  | -0.094641 |
| 4                | 7                | 0              | -0.030889               | -2.413096 | -1.375682 |
| 5                | 6                | 0              | -0.486541               | -3.347048 | -2.421459 |
| 6                | 6                | 0              | 3.337127                | 2.789305  | -1.404370 |
| 7                | 6                | 0              | 3.108304                | 4.024142  | -2.013126 |
| 8                | 6                | 0              | 2.581920                | 5.085979  | -1.272902 |
| 9                | 1                | 0              | -0.551716               | -2.571170 | -0.507088 |
| 10               | 1                | 0              | 0.109491                | -3.150926 | -3.321311 |
| 11               | 1                | 0              | -0.228450               | -4.361565 | -2.095571 |
| 12               | 6                | 0              | -1.980146               | -3.276084 | -2.759445 |
| 13               | 8                | 0              | 2.969910                | 1.160790  | 1.837406  |
| 14               | 1                | 0              | 2.992197                | -0.298820 | 2.584297  |
| 15               | 1                | 0              | 1.452475                | -3.579406 | 1.749444  |
| 16               | 8                | 0              | 1.055716                | -3.099051 | 2.523420  |
| 17               | 1                | 0              | -0.427122               | -2.676877 | 1.961371  |
| 18               | 1                | 0              | -0.253489               | -1.452022 | -1.649885 |
| 19               | 8                | 0              | -1.048658               | 0.550988  | -2.083741 |
| 20               | 1                | 0              | -0.926074               | 0.816128  | -3.006989 |
| 21               | 1                | 0              | -2.020433               | 0.429581  | -1.942534 |
| 22               | 8                | 0              | -3.633209               | 0.311149  | -1.184368 |
| 23               | 1                | 0              | -4.399832               | -0.249096 | -1.466216 |
| 24               | 1                | 0              | 1.692468                | -2.379502 | 2.741662  |
| 25               | 8                | 0              | 3.034854                | -1.181315 | 3.078477  |
| 26               | 1                | 0              | 3.181432                | -0.951287 | 4.007417  |
| 27               | 1                | 0              | 4.795384                | -0.961940 | 0.728679  |
| 28               | 8                | 0              | 5.166378                | -1.743819 | 1.205558  |
| 29               | 1                | 0              | 4.576214                | -1.804156 | 1.982940  |
| 30               | 1                | 0              | -3.359739               | -0.077420 | -0.302724 |
| 31               | 8                | 0              | -3.082064               | -0.495851 | 1.334816  |
| 32               | 1                | 0              | -2.735981               | 0.371847  | 1.673955  |
| 33               | 1                | 0              | -4.240241               | 1.810403  | -0.616862 |
| 34               | 8                | 0              | -4.566335               | 2.618891  | -0.125600 |

|    |   |   |           |           |           |
|----|---|---|-----------|-----------|-----------|
| 35 | 1 | 0 | -4.393819 | 3.382776  | -0.695420 |
| 36 | 1 | 0 | 1.384181  | -3.598572 | -0.406353 |
| 37 | 8 | 0 | 1.840148  | -4.254594 | 0.159489  |
| 38 | 1 | 0 | 2.797859  | -4.153276 | -0.088034 |
| 39 | 1 | 0 | -5.993053 | 2.192160  | 0.917233  |
| 40 | 8 | 0 | -6.653320 | 1.797257  | 1.532079  |
| 41 | 1 | 0 | -6.433943 | 2.150925  | 2.407078  |
| 42 | 1 | 0 | -4.906876 | -0.859399 | 1.487967  |
| 43 | 8 | 0 | -5.873707 | -0.932137 | 1.313158  |
| 44 | 1 | 0 | -6.226428 | -0.027634 | 1.467803  |
| 45 | 1 | 0 | -2.390618 | -1.191821 | 1.483797  |
| 46 | 8 | 0 | -1.342263 | -2.596849 | 1.536871  |
| 47 | 1 | 0 | -1.819752 | -3.385504 | 1.834462  |
| 48 | 1 | 0 | -6.712244 | -0.980182 | -1.749236 |
| 49 | 8 | 0 | -5.870592 | -1.282477 | -1.378782 |
| 50 | 1 | 0 | -5.975098 | -1.237598 | -0.385735 |
| 51 | 1 | 0 | 1.944658  | -1.794996 | -1.682031 |
| 52 | 8 | 0 | 2.831492  | -1.512699 | -1.990128 |
| 53 | 1 | 0 | 3.113582  | -0.802864 | -1.369762 |
| 54 | 1 | 0 | 3.961612  | -2.915458 | -1.341485 |
| 55 | 8 | 0 | 4.355517  | -3.589462 | -0.741862 |
| 56 | 1 | 0 | 4.747573  | -3.045511 | -0.015275 |
| 57 | 1 | 0 | -3.176240 | 2.480261  | 1.282226  |
| 58 | 8 | 0 | -2.421681 | 2.120631  | 1.788026  |
| 59 | 1 | 0 | -1.648760 | 2.300093  | 1.198935  |
| 60 | 1 | 0 | 0.347210  | 2.816504  | -0.051249 |
| 61 | 8 | 0 | -0.591056 | 2.639604  | -0.237756 |
| 62 | 1 | 0 | -0.610730 | 1.892070  | -0.876970 |
| 63 | 6 | 0 | 2.512027  | 3.670985  | 0.689912  |
| 64 | 6 | 0 | 2.284767  | 4.907542  | 0.080847  |
| 65 | 1 | 0 | 3.751584  | 1.955937  | -1.962043 |
| 66 | 1 | 0 | 3.341952  | 4.159074  | -3.066758 |
| 67 | 1 | 0 | 2.403284  | 6.047757  | -1.748228 |
| 68 | 1 | 0 | 2.294492  | 3.512125  | 1.741369  |
| 69 | 1 | 0 | 1.876039  | 5.730541  | 0.662325  |
| 70 | 1 | 0 | -2.595884 | -3.490483 | -1.877715 |
| 71 | 1 | 0 | -2.257447 | -2.278430 | -3.121302 |
| 72 | 1 | 0 | -2.242279 | -4.003308 | -3.539213 |

-----  
SCF Done: E(RB3LYP) = -1778.57194124 A.U. after 1 cycles

Conv = 0.5257D-08 -V/T = 2.0094

Zero-point correction= 0.608726 (a.u.)

Thermal correction to Energy= 0.660999

Thermal correction to Enthalpy= 0.661943

Thermal correction to Gibbs Free Energy= 0.515024

Sum of electronic and zero-point Energies= -1777.963215

Sum of electronic and thermal Energies= -1777.910942  
Sum of electronic and thermal Enthalpies= -1777.909998  
Sum of electronic and thermal Free Energies= -1778.056918

---

[5] The result of ADMP dynamical calculations starting from the n = 16 TS1(es) in Figures 1 and 3. The geometry after 800 femtoseconds shown in Figure S3.

TRJ-TRJ-TRJ-TRJ-TRJ-TRJ-TRJ-TRJ-TRJ-TRJ-TRJ-TRJ-TRJ-TRJ-TRJ-TRJ

-----  
 INPUT DATA FOR L121  
 -----

General parameters:

Maximum Steps = 8000  
 Random Number Generator Seed = 398465  
 Time Step = 0.10000 femtosec  
 Fictitious electronic mass = 0.10000 amu  
 MW individual basis funct. = True  
 Initial nuclear kin. energy = 0.10000 hartree  
 Initial electr. kin. energy = 0.00000 hartree  
 Initial electr. KE scheme = 0  
 Multitime step - NDtrC = 1  
 Multitime step - NDtrP = 1  
 No Thermostats chosen to control nuclear temperature

Integration parameters:

Follow Rxn Path (DVV) = False  
 Constraint Scheme = 10  
 Projection of angular mom. = True  
 Rotate density with nuclei = True

-----  
 TRJ-TRJ-TRJ-TRJ-TRJ-TRJ-TRJ-TRJ-TRJ-TRJ-TRJ-TRJ-TRJ-TRJ-TRJ-TRJ

Symmetry turned off by external request.

Stoichiometry C9H43O19(1-)

{the geometry after 800 femtoseconds (1 femtosecond = 10<sup>-15</sup> seconds)}

Z-Matrix orientation:

-----

| Center Number | Atomic Number | Atomic Type | Coordinates (Angstroms) |           |           |
|---------------|---------------|-------------|-------------------------|-----------|-----------|
|               |               |             | X                       | Y         | Z         |
| 1             | 6             | 0           | 0.155426                | 3.218905  | 0.002278  |
| 2             | 6             | 0           | -0.646047               | 2.589342  | 1.101693  |
| 3             | 8             | 0           | -1.871292               | 2.518345  | 1.088164  |
| 4             | 8             | 0           | 0.075124                | 2.073706  | 2.088168  |
| 5             | 6             | 0           | -0.595911               | 1.507661  | 3.252822  |
| 6             | 6             | 0           | -0.416272               | 3.291273  | -1.276570 |
| 7             | 6             | 0           | 0.296954                | 3.903214  | -2.307088 |
| 8             | 6             | 0           | 1.409210                | 3.766710  | 0.267399  |
| 9             | 6             | 0           | 0.406709                | 1.663979  | 4.391734  |
| 10            | 1             | 0           | -1.563735               | 2.059907  | 3.379593  |
| 11            | 1             | 0           | -0.762703               | 0.498800  | 3.004392  |
| 12            | 8             | 0           | 2.816336                | -0.173554 | 1.683389  |

-----

|    |   |   |           |           |           |
|----|---|---|-----------|-----------|-----------|
| 13 | 1 | 0 | 2.209735  | 0.559851  | 1.484686  |
| 14 | 1 | 0 | 2.167136  | -1.027442 | 1.661518  |
| 15 | 8 | 0 | 1.313067  | -2.213730 | 1.261694  |
| 16 | 1 | 0 | 1.507436  | -2.869930 | 1.937406  |
| 17 | 1 | 0 | 1.920583  | -2.650400 | -0.098705 |
| 18 | 8 | 0 | 2.439874  | -2.905666 | -0.967106 |
| 19 | 1 | 0 | 3.013158  | -2.124998 | -1.078767 |
| 20 | 1 | 0 | 3.727949  | -3.304084 | 0.343191  |
| 21 | 8 | 0 | 4.309682  | -3.064242 | 1.097955  |
| 22 | 1 | 0 | 3.913903  | -2.251324 | 1.388929  |
| 23 | 1 | 0 | 1.312373  | -2.568487 | -2.210448 |
| 24 | 8 | 0 | 0.632085  | -2.143044 | -2.803458 |
| 25 | 1 | 0 | -0.173855 | -2.705488 | -2.761394 |
| 26 | 1 | 0 | 0.109565  | -0.874167 | -1.940661 |
| 27 | 8 | 0 | -0.210573 | -0.036392 | -1.430478 |
| 28 | 1 | 0 | 0.470751  | 0.657633  | -1.384100 |
| 29 | 1 | 0 | 5.691134  | -2.451894 | 0.228626  |
| 30 | 8 | 0 | 6.357180  | -1.975578 | -0.341479 |
| 31 | 1 | 0 | 6.497649  | -2.609818 | -1.066708 |
| 32 | 1 | 0 | -3.039242 | -0.008823 | -1.052541 |
| 33 | 8 | 0 | -2.815206 | 0.019488  | -1.983876 |
| 34 | 1 | 0 | -1.832790 | 0.103786  | -1.960300 |
| 35 | 1 | 0 | -2.281365 | -1.871016 | -2.637962 |
| 36 | 8 | 0 | -2.020125 | -2.793245 | -2.738273 |
| 37 | 1 | 0 | -2.413503 | -3.154669 | -1.939234 |
| 38 | 1 | 0 | -4.747538 | -0.696026 | -2.192923 |
| 39 | 8 | 0 | -5.479214 | -1.087296 | -1.653605 |
| 40 | 1 | 0 | -5.400819 | -0.661292 | -0.783208 |
| 41 | 1 | 0 | -0.998480 | -1.167647 | 0.054654  |
| 42 | 8 | 0 | -1.175027 | -1.864633 | 0.691197  |
| 43 | 1 | 0 | -0.247486 | -2.147829 | 0.916200  |
| 44 | 1 | 0 | -4.068531 | -4.443679 | 2.165563  |
| 45 | 8 | 0 | -4.775902 | -3.791957 | 1.920986  |
| 46 | 1 | 0 | -4.475020 | -3.579291 | 0.950969  |
| 47 | 1 | 0 | -2.883988 | -2.484765 | -0.003515 |
| 48 | 8 | 0 | -3.634781 | -2.971167 | -0.386722 |
| 49 | 1 | 0 | -4.236954 | -2.286467 | -0.756061 |
| 50 | 1 | 0 | 3.641435  | -0.270137 | 0.024448  |
| 51 | 8 | 0 | 3.972294  | -0.498072 | -0.845719 |
| 52 | 1 | 0 | 4.949851  | -0.703501 | -0.755248 |
| 53 | 1 | 0 | 3.890378  | 1.131399  | -1.687917 |
| 54 | 8 | 0 | 3.778614  | 1.999372  | -2.050654 |
| 55 | 1 | 0 | 3.104196  | 1.854822  | -2.686036 |
| 56 | 1 | 0 | -3.577743 | -2.350941 | 2.442126  |
| 57 | 8 | 0 | -3.066596 | -1.514112 | 2.539212  |
| 58 | 1 | 0 | -2.252961 | -1.618986 | 1.943870  |



|    |   |   |           |           |           |
|----|---|---|-----------|-----------|-----------|
| 59 | 1 | 0 | -3.594694 | -0.510124 | 1.263144  |
| 60 | 8 | 0 | -4.033255 | 0.024472  | 0.527858  |
| 61 | 1 | 0 | -3.800716 | 0.961021  | 0.653188  |
| 62 | 6 | 0 | 2.108074  | 4.428121  | -0.721073 |
| 63 | 6 | 0 | 1.520000  | 4.509117  | -1.990104 |
| 64 | 1 | 0 | -1.397772 | 2.856362  | -1.356030 |
| 65 | 1 | 0 | -0.113251 | 3.985188  | -3.340080 |
| 66 | 1 | 0 | 1.833899  | 3.759543  | 1.257922  |
| 67 | 1 | 0 | 3.075326  | 4.821603  | -0.543185 |
| 68 | 1 | 0 | 2.137321  | 4.975422  | -2.711986 |
| 69 | 1 | 0 | 1.385433  | 1.240245  | 4.061821  |
| 70 | 1 | 0 | 0.531687  | 2.707257  | 4.694864  |
| 71 | 1 | 0 | 0.074879  | 1.091183  | 5.236612  |

[6] Figure S2. The geometry of the Mulliken CT complex composed of benzoic acid, ethylamine and (H<sub>2</sub>O)<sub>5</sub>.

Stoichiometry C<sub>9</sub>H<sub>23</sub>NO<sub>7</sub>

(6-1) B3LYP/6-31(+)-G(d) SCRF=(PCM, solvent=water)

Standard orientation:

| -----  |        |        |                         |           |           |  |
|--------|--------|--------|-------------------------|-----------|-----------|--|
| Center | Atomic | Atomic | Coordinates (Angstroms) |           |           |  |
| Number | Number | Type   | X                       | Y         | Z         |  |
| -----  |        |        |                         |           |           |  |
| 1      | 6      | 0      | 1.378914                | 0.023134  | -0.547205 |  |
| 2      | 6      | 0      | -0.145270               | -0.023195 | -0.400133 |  |
| 3      | 8      | 0      | -0.787734               | 1.100493  | -0.555506 |  |
| 4      | 7      | 0      | -0.439871               | -0.573994 | 1.147628  |  |
| 5      | 6      | 0      | 0.080117                | 0.269889  | 2.272742  |  |
| 6      | 6      | 0      | 2.045308                | 1.251447  | -0.474904 |  |
| 7      | 6      | 0      | 3.435485                | 1.312912  | -0.597999 |  |
| 8      | 6      | 0      | 4.175513                | 0.146236  | -0.797221 |  |
| 9      | 1      | 0      | -1.473870               | -0.616798 | 1.216332  |  |
| 10     | 6      | 0      | 1.351675                | -0.291678 | 2.898318  |  |
| 11     | 1      | 0      | 0.236945                | 1.273218  | 1.869617  |  |
| 12     | 1      | 0      | -0.715836               | 0.336486  | 3.018729  |  |
| 13     | 8      | 0      | -0.643004               | -1.120753 | -1.164171 |  |
| 14     | 1      | 0      | -1.514256               | -0.880986 | -1.571619 |  |
| 15     | 1      | 0      | -0.114161               | -1.545282 | 1.225145  |  |
| 16     | 6      | 0      | 2.128244                | -1.144734 | -0.752334 |  |
| 17     | 6      | 0      | 3.516920                | -1.083710 | -0.875761 |  |
| 18     | 1      | 0      | 1.474530                | 2.161402  | -0.328416 |  |
| 19     | 1      | 0      | 3.937852                | 2.274701  | -0.541068 |  |
| 20     | 1      | 0      | 5.256616                | 0.194044  | -0.894080 |  |
| 21     | 1      | 0      | 1.628406                | -2.104661 | -0.825676 |  |
| 22     | 1      | 0      | 4.082944                | -1.996822 | -1.037927 |  |
| 23     | 1      | 0      | 1.176803                | -1.286889 | 3.323072  |  |
| 24     | 1      | 0      | 2.165715                | -0.360204 | 2.171661  |  |
| 25     | 1      | 0      | 1.674517                | 0.366978  | 3.710757  |  |
| 26     | 8      | 0      | -0.639103               | -3.472836 | 0.355528  |  |
| 27     | 1      | 0      | -0.693621               | -2.839077 | -0.392720 |  |
| 28     | 1      | 0      | -0.109820               | -4.220585 | 0.036973  |  |
| 29     | 8      | 0      | -3.317812               | -0.469181 | 1.641665  |  |
| 30     | 1      | 0      | -3.586124               | 0.140010  | 0.913339  |  |
| 31     | 1      | 0      | -3.813604               | -1.290534 | 1.496896  |  |
| 32     | 8      | 0      | -3.113129               | -0.755855 | -2.397756 |  |
| 33     | 1      | 0      | -3.019803               | -0.467445 | -3.319746 |  |
| 34     | 1      | 0      | -3.466816               | 0.021561  | -1.905037 |  |
| 35     | 1      | 0      | -2.433125               | 1.258785  | -0.531835 |  |
| 36     | 8      | 0      | -3.440495               | 1.210291  | -0.536000 |  |
| 37     | 1      | 0      | -3.778883               | 2.119564  | -0.548447 |  |
| 38     | 1      | 0      | -0.615256               | 2.777225  | -0.008805 |  |

|    |   |   |           |          |           |
|----|---|---|-----------|----------|-----------|
| 39 | 8 | 0 | -0.624720 | 3.720150 | 0.288050  |
| 40 | 1 | 0 | -0.493506 | 4.242986 | -0.518044 |

(6-2) B3PW91/ 6-311+G(d,p) SCRF=(PCM, solvent=water)

Standard orientation:

| Center<br>Number | Atomic<br>Number | Atomic<br>Type | Coordinates (Angstroms) |           |           |
|------------------|------------------|----------------|-------------------------|-----------|-----------|
|                  |                  |                | X                       | Y         | Z         |
| 1                | 6                | 0              | -1.338509               | 0.306952  | 0.190768  |
| 2                | 6                | 0              | 0.183042                | 0.158319  | 0.113469  |
| 3                | 8                | 0              | 0.784193                | 1.018905  | -0.657224 |
| 4                | 7                | 0              | 0.474155                | -1.334316 | -0.465400 |
| 5                | 6                | 0              | -0.084800               | -1.656097 | -1.809858 |
| 6                | 6                | 0              | -2.000907               | 0.989736  | -0.829173 |
| 7                | 6                | 0              | -3.384981               | 1.140032  | -0.798325 |
| 8                | 6                | 0              | -4.121122               | 0.609987  | 0.257722  |
| 9                | 1                | 0              | 1.507998                | -1.403054 | -0.517435 |
| 10               | 6                | 0              | -1.338660               | -2.507845 | -1.740585 |
| 11               | 1                | 0              | -0.264616               | -0.704249 | -2.312586 |
| 12               | 1                | 0              | 0.698456                | -2.174652 | -2.365584 |
| 13               | 8                | 0              | 0.697632                | 0.046286  | 1.431667  |
| 14               | 1                | 0              | 1.566339                | 0.509760  | 1.480366  |
| 15               | 1                | 0              | 0.184038                | -2.022740 | 0.238246  |
| 16               | 6                | 0              | -2.081588               | -0.218367 | 1.249885  |
| 17               | 6                | 0              | -3.464937               | -0.067080 | 1.283369  |
| 18               | 1                | 0              | -1.419957               | 1.409998  | -1.642249 |
| 19               | 1                | 0              | -3.887355               | 1.674795  | -1.597983 |
| 20               | 1                | 0              | -5.199488               | 0.728127  | 0.285319  |
| 21               | 1                | 0              | -1.580689               | -0.736316 | 2.058857  |
| 22               | 1                | 0              | -4.030688               | -0.475016 | 2.114792  |
| 23               | 1                | 0              | -1.135127               | -3.469867 | -1.261576 |
| 24               | 1                | 0              | -2.138949               | -2.006726 | -1.192693 |
| 25               | 1                | 0              | -1.695168               | -2.708484 | -2.753563 |
| 26               | 8                | 0              | 0.635159                | -2.639725 | 2.200611  |
| 27               | 1                | 0              | 0.711661                | -1.670230 | 2.251357  |
| 28               | 1                | 0              | 0.064927                | -2.896984 | 2.930625  |
| 29               | 8                | 0              | 3.296670                | -1.625392 | -0.973289 |
| 30               | 1                | 0              | 3.555047                | -0.681992 | -1.031224 |
| 31               | 1                | 0              | 3.862874                | -2.011523 | -0.298444 |
| 32               | 8                | 0              | 3.179348                | 1.209358  | 1.766342  |
| 33               | 1                | 0              | 3.171878                | 2.085538  | 2.163430  |
| 34               | 1                | 0              | 3.473627                | 1.339285  | 0.841859  |
| 35               | 1                | 0              | 2.358614                | 1.104036  | -0.921567 |
| 36               | 8                | 0              | 3.365910                | 1.098059  | -0.952616 |

|    |   |   |           |          |           |
|----|---|---|-----------|----------|-----------|
| 37 | 1 | 0 | 3.644562  | 1.718944 | -1.631720 |
| 38 | 1 | 0 | 0.491739  | 2.735312 | -0.442923 |
| 39 | 8 | 0 | 0.423128  | 3.713549 | -0.351394 |
| 40 | 1 | 0 | -0.520355 | 3.894112 | -0.353902 |

---

[7] The Na<sup>+</sup>-containing ester hydrolysis shown in Figure S3.

(7-1) Reactant-like complex (precursor) composed of  
ethyl benzoate and NaOH(H<sub>2</sub>O)<sub>16</sub>

zuka02aana.rev.chk Stoichiometry C<sub>9</sub>H<sub>43</sub>NaO<sub>19</sub>

Standard orientation:

| -----  |        |        |                         |           |           |  |
|--------|--------|--------|-------------------------|-----------|-----------|--|
| Center | Atomic | Atomic | Coordinates (Angstroms) |           |           |  |
| Number | Number | Type   | X                       | Y         | Z         |  |
| -----  |        |        |                         |           |           |  |
| 1      | 6      | 0      | -3.388983               | 1.084531  | -0.238450 |  |
| 2      | 6      | 0      | -2.311023               | 0.885381  | 0.765159  |  |
| 3      | 8      | 0      | -1.851612               | -0.221371 | 1.075184  |  |
| 4      | 8      | 0      | -1.892283               | 2.025436  | 1.294757  |  |
| 5      | 6      | 0      | -0.750531               | 2.022834  | 2.198127  |  |
| 6      | 6      | 0      | -3.490066               | 2.300178  | -0.935378 |  |
| 7      | 6      | 0      | -4.286689               | 0.038594  | -0.507493 |  |
| 8      | 6      | 0      | -5.282757               | 0.206205  | -1.466944 |  |
| 9      | 6      | 0      | -0.630785               | 3.423268  | 2.764910  |  |
| 10     | 1      | 0      | -0.922276               | 1.271010  | 2.974200  |  |
| 11     | 1      | 0      | 0.132814                | 1.745474  | 1.615759  |  |
| 12     | 8      | 0      | 1.894450                | 0.641843  | -1.302515 |  |
| 13     | 1      | 0      | 2.652481                | 0.617919  | -1.923905 |  |
| 14     | 1      | 0      | 2.261343                | 0.465369  | -0.356275 |  |
| 15     | 8      | 0      | 2.717642                | 0.205981  | 1.118014  |  |
| 16     | 1      | 0      | 2.735848                | 1.085475  | 1.536479  |  |
| 17     | 1      | 0      | 4.136370                | -0.155804 | 0.923675  |  |
| 18     | 8      | 0      | 5.155663                | -0.301630 | 0.690940  |  |
| 19     | 1      | 0      | 5.555201                | -0.773370 | 1.437455  |  |
| 20     | 1      | 0      | 5.622590                | 1.376874  | 0.639269  |  |
| 21     | 8      | 0      | 5.711780                | 2.367914  | 0.649429  |  |
| 22     | 1      | 0      | 6.012940                | 2.620669  | -0.235738 |  |
| 23     | 1      | 0      | 5.220295                | -1.250663 | -0.855889 |  |
| 24     | 8      | 0      | 5.164896                | -1.736680 | -1.713131 |  |
| 25     | 1      | 0      | 4.617928                | -2.531860 | -1.532928 |  |
| 26     | 1      | 0      | 4.227152                | -0.874556 | -2.810240 |  |
| 27     | 8      | 0      | 3.545948                | -0.381622 | -3.359519 |  |
| 28     | 1      | 0      | 4.018766                | -0.020852 | -4.124023 |  |
| 29     | 1      | 0      | 4.149565                | 2.967704  | 1.142789  |  |
| 30     | 8      | 0      | 3.231127                | 3.183582  | 1.456394  |  |
| 31     | 1      | 0      | 3.333079                | 3.883093  | 2.118603  |  |
| 32     | 1      | 0      | 1.305247                | -0.787126 | -1.902009 |  |
| 33     | 8      | 0      | 1.094471                | -1.636323 | -2.405239 |  |
| 34     | 1      | 0      | 1.638389                | -1.524606 | -3.209234 |  |
| 35     | 1      | 0      | 2.429778                | -3.020543 | -1.830332 |  |
| 36     | 8      | 0      | 3.109382                | -3.652396 | -1.521197 |  |

|    |    |   |           |           |           |
|----|----|---|-----------|-----------|-----------|
| 37 | 1  | 0 | 2.704866  | -4.083840 | -0.751471 |
| 38 | 1  | 0 | -0.747735 | -1.596664 | -2.440227 |
| 39 | 8  | 0 | -1.686111 | -1.664373 | -2.146513 |
| 40 | 1  | 0 | -2.137682 | -0.876517 | -2.483578 |
| 41 | 1  | 0 | 0.017849  | -0.744587 | 1.779461  |
| 42 | 8  | 0 | 0.823049  | -1.274294 | 1.933697  |
| 43 | 1  | 0 | 1.632187  | -0.659962 | 1.674424  |
| 44 | 1  | 0 | 0.462388  | -2.397574 | 3.200096  |
| 45 | 8  | 0 | 0.007611  | -3.079032 | 3.764885  |
| 46 | 1  | 0 | 0.610833  | -3.833971 | 3.827595  |
| 47 | 1  | 0 | 0.646923  | -2.487220 | 0.680153  |
| 48 | 8  | 0 | 0.290957  | -3.109437 | -0.007775 |
| 49 | 1  | 0 | 0.594249  | -2.751007 | -0.861667 |
| 50 | 1  | 0 | 1.490867  | 2.425855  | -1.056097 |
| 51 | 8  | 0 | 1.426309  | 3.363237  | -0.762349 |
| 52 | 1  | 0 | 2.031011  | 3.423942  | 0.007184  |
| 53 | 1  | 0 | -0.164626 | 4.134656  | -0.754499 |
| 54 | 8  | 0 | -1.040330 | 4.596148  | -0.769166 |
| 55 | 1  | 0 | -0.909698 | 5.353431  | -1.357957 |
| 56 | 1  | 0 | -1.492751 | -3.285656 | 2.935292  |
| 57 | 8  | 0 | -2.352253 | -3.174738 | 2.444087  |
| 58 | 1  | 0 | -2.853914 | -2.539089 | 2.976786  |
| 59 | 1  | 0 | -3.449711 | -4.032890 | 1.138784  |
| 60 | 8  | 0 | -3.742020 | -3.804454 | 0.232035  |
| 61 | 1  | 0 | -3.972780 | -4.628959 | -0.218871 |
| 62 | 11 | 0 | -1.905854 | -2.370958 | 0.061921  |
| 63 | 6  | 0 | -4.482974 | 2.450465  | -1.903970 |
| 64 | 6  | 0 | -5.378314 | 1.411853  | -2.168867 |
| 65 | 1  | 0 | -2.780829 | 3.101757  | -0.743116 |
| 66 | 1  | 0 | -4.225267 | -0.892731 | 0.048120  |
| 67 | 1  | 0 | -5.983564 | -0.600090 | -1.663333 |
| 68 | 1  | 0 | -4.553886 | 3.384508  | -2.453841 |
| 69 | 1  | 0 | -6.152222 | 1.539701  | -2.921085 |
| 70 | 1  | 0 | -0.524323 | 4.153528  | 1.957870  |
| 71 | 1  | 0 | -1.512827 | 3.683008  | 3.359218  |
| 72 | 1  | 0 | 0.250861  | 3.474529  | 3.413269  |

-----  
SCF Done: E(RB+HF-LYP) = -1960.70791006 A.U. after 1 cycles

Conv = 0.2288D-08 -V/T = 2.0090

S\*\*2 = 0.0000

Zero-point correction= 0.590376 (a.u.)  
Thermal correction to Energy= 0.645867  
Thermal correction to Enthalpy= 0.646812  
Thermal correction to Gibbs Free Energy= 0.493684  
Sum of electronic and zero-point Energies= -1960.117534  
Sum of electronic and thermal Energies= -1960.062043

Sum of electronic and thermal Enthalpies= -1960.061098  
Sum of electronic and thermal Free Energies= -1960.214226

(7-2) TS1(es), OH- nucleophilic addition  
zuka02aana.chk Stoichiometry C9H43NaO19

Standard orientation:

| -----  |        |        |                         |           |           |  |
|--------|--------|--------|-------------------------|-----------|-----------|--|
| Center | Atomic | Atomic | Coordinates (Angstroms) |           |           |  |
| Number | Number | Type   | X                       | Y         | Z         |  |
| -----  |        |        |                         |           |           |  |
| 1      | 6      | 0      | 0.307003                | 2.434064  | -0.649981 |  |
| 2      | 6      | 0      | -0.039039               | 1.416979  | 0.399734  |  |
| 3      | 8      | 0      | -1.111310               | 0.726106  | 0.327400  |  |
| 4      | 8      | 0      | 0.465870                | 1.770505  | 1.597975  |  |
| 5      | 6      | 0      | 0.190790                | 0.947973  | 2.746176  |  |
| 6      | 6      | 0      | 1.450880                | 3.236588  | -0.525369 |  |
| 7      | 6      | 0      | -0.533882               | 2.604280  | -1.757718 |  |
| 8      | 6      | 0      | -0.238067               | 3.560779  | -2.730258 |  |
| 9      | 6      | 0      | 0.813526                | 1.628865  | 3.951502  |  |
| 10     | 1      | 0      | -0.893538               | 0.837768  | 2.860261  |  |
| 11     | 1      | 0      | 0.623702                | -0.042796 | 2.578692  |  |
| 12     | 8      | 0      | 1.364728                | 0.042574  | -0.066948 |  |
| 13     | 1      | 0      | 1.459602                | -0.001125 | -1.037381 |  |
| 14     | 1      | 0      | 1.352780                | -1.422791 | 0.529554  |  |
| 15     | 8      | 0      | 1.335465                | -2.344875 | 0.986139  |  |
| 16     | 1      | 0      | 1.951336                | -2.266667 | 1.749352  |  |
| 17     | 1      | 0      | 2.211709                | -3.342379 | -0.088741 |  |
| 18     | 8      | 0      | 2.850575                | -3.783706 | -0.719985 |  |
| 19     | 1      | 0      | 2.878676                | -4.721486 | -0.476102 |  |
| 20     | 1      | 0      | 4.376333                | -2.764187 | -0.091233 |  |
| 21     | 8      | 0      | 4.940931                | -2.218541 | 0.496471  |  |
| 22     | 1      | 0      | 4.707135                | -1.281697 | 0.307410  |  |
| 23     | 1      | 0      | 2.029979                | -3.539780 | -2.358036 |  |
| 24     | 8      | 0      | 1.493255                | -3.308313 | -3.148191 |  |
| 25     | 1      | 0      | 0.579394                | -3.608661 | -2.944265 |  |
| 26     | 1      | 0      | 1.439290                | -1.637557 | -3.219106 |  |
| 27     | 8      | 0      | 1.271327                | -0.648180 | -3.152109 |  |
| 28     | 1      | 0      | 1.668727                | -0.234600 | -3.932385 |  |
| 29     | 1      | 0      | 4.159936                | -2.202203 | 2.028810  |  |
| 30     | 8      | 0      | 3.504399                | -1.961756 | 2.745050  |  |
| 31     | 1      | 0      | 3.800435                | -2.381609 | 3.565841  |  |
| 32     | 1      | 0      | -0.962030               | -0.332835 | -1.257498 |  |
| 33     | 8      | 0      | -1.203846               | -0.711448 | -2.132589 |  |
| 34     | 1      | 0      | -0.396857               | -0.572487 | -2.695143 |  |
| 35     | 1      | 0      | -1.272146               | -2.562024 | -2.286126 |  |
| 36     | 8      | 0      | -1.236488               | -3.523409 | -2.479851 |  |

|    |    |   |           |           |           |
|----|----|---|-----------|-----------|-----------|
| 37 | 1  | 0 | -1.881299 | -3.910900 | -1.861914 |
| 38 | 1  | 0 | -2.890572 | -0.482181 | -2.079582 |
| 39 | 8  | 0 | -3.755887 | -0.393960 | -1.594094 |
| 40 | 1  | 0 | -4.455372 | -0.296553 | -2.257172 |
| 41 | 1  | 0 | -1.191842 | -0.959464 | 1.090397  |
| 42 | 8  | 0 | -1.315889 | -1.897152 | 1.366054  |
| 43 | 1  | 0 | -0.394586 | -2.265387 | 1.338513  |
| 44 | 1  | 0 | -2.887247 | -2.205785 | 2.374631  |
| 45 | 8  | 0 | -3.868369 | -2.258479 | 2.423286  |
| 46 | 1  | 0 | -4.082209 | -2.729958 | 1.590193  |
| 47 | 1  | 0 | -2.464321 | -2.690492 | 0.167151  |
| 48 | 8  | 0 | -3.274739 | -3.038129 | -0.274740 |
| 49 | 1  | 0 | -3.605156 | -2.284894 | -0.800448 |
| 50 | 1  | 0 | 2.899772  | 0.325278  | 0.483661  |
| 51 | 8  | 0 | 3.832964  | 0.362917  | 0.875358  |
| 52 | 1  | 0 | 3.728315  | 0.020834  | 1.781537  |
| 53 | 1  | 0 | 4.339507  | 2.103914  | 0.943801  |
| 54 | 8  | 0 | 4.546532  | 3.067550  | 0.971050  |
| 55 | 1  | 0 | 5.464678  | 3.140876  | 0.673329  |
| 56 | 1  | 0 | -4.321219 | -0.663536 | 2.339607  |
| 57 | 8  | 0 | -4.420716 | 0.334917  | 2.241025  |
| 58 | 1  | 0 | -4.230066 | 0.696234  | 3.120000  |
| 59 | 1  | 0 | -5.587926 | 1.577745  | 1.195836  |
| 60 | 8  | 0 | -5.340789 | 2.122154  | 0.422273  |
| 61 | 1  | 0 | -6.095212 | 2.682442  | 0.192184  |
| 62 | 11 | 0 | -3.341114 | 0.999930  | 0.229325  |
| 63 | 6  | 0 | 1.743256  | 4.189217  | -1.499166 |
| 64 | 6  | 0 | 0.901875  | 4.355883  | -2.602297 |
| 65 | 1  | 0 | 2.120224  | 3.112790  | 0.317296  |
| 66 | 1  | 0 | -1.413730 | 1.978947  | -1.868271 |
| 67 | 1  | 0 | -0.897065 | 3.681710  | -3.586146 |
| 68 | 1  | 0 | 2.637084  | 4.796284  | -1.390464 |
| 69 | 1  | 0 | 1.134562  | 5.100015  | -3.359589 |
| 70 | 1  | 0 | 1.893080  | 1.746093  | 3.816955  |
| 71 | 1  | 0 | 0.378470  | 2.621146  | 4.109119  |
| 72 | 1  | 0 | 0.637763  | 1.024755  | 4.848561  |

-----  
SCF Done: E(RB+HF-LYP) = -1960.67759746 A.U. after 1 cycles

Conv = 0.3766D-08 -V/T = 2.0090

S\*\*2 = 0.0000

Zero-point correction= 0.594015 (a.u.)  
Thermal correction to Energy= 0.647392  
Thermal correction to Enthalpy= 0.648336  
Thermal correction to Gibbs Free Energy= 0.503230  
Sum of electronic and zero-point Energies= -1960.083582  
Sum of electronic and thermal Energies= -1960.030206



Sum of electronic and thermal Enthalpies= -1960.029262  
Sum of electronic and thermal Free Energies= -1960.174368

(7-3) The OH- adduct, Int1(es)( anionic tetrahedral intermediate )

Ph-C(-O-)(OH)-OEt + Na+ + (H2O)16

zuka02bbbn.rev.chk Stoichiometry C9H43NaO19

Standard orientation:

| -----  |        |        |                         |           |           |  |
|--------|--------|--------|-------------------------|-----------|-----------|--|
| Center | Atomic | Atomic | Coordinates (Angstroms) |           |           |  |
| Number | Number | Type   | X                       | Y         | Z         |  |
| -----  |        |        |                         |           |           |  |
| 1      | 6      | 0      | -0.939830               | 2.605122  | -0.499605 |  |
| 2      | 6      | 0      | -1.493055               | 1.172981  | -0.608753 |  |
| 3      | 8      | 0      | -1.272958               | 0.463764  | 0.526088  |  |
| 4      | 8      | 0      | -0.794882               | 0.427194  | -1.681365 |  |
| 5      | 6      | 0      | -1.021186               | 0.895391  | -3.033739 |  |
| 6      | 6      | 0      | -1.748580               | 3.604562  | 0.058031  |  |
| 7      | 6      | 0      | 0.384281                | 2.919901  | -0.830617 |  |
| 8      | 6      | 0      | 0.894123                | 4.199960  | -0.600066 |  |
| 9      | 6      | 0      | -0.053883               | 0.182859  | -3.964982 |  |
| 10     | 1      | 0      | -2.061355               | 0.689763  | -3.304049 |  |
| 11     | 1      | 0      | -0.869663               | 1.979919  | -3.067645 |  |
| 12     | 8      | 0      | -2.852544               | 1.261293  | -0.947596 |  |
| 13     | 1      | 0      | -3.343232               | 0.508789  | -0.553115 |  |
| 14     | 1      | 0      | -4.872912               | -3.430731 | -1.276191 |  |
| 15     | 8      | 0      | -4.732802               | -2.514010 | -1.554578 |  |
| 16     | 1      | 0      | -3.762347               | -2.433469 | -1.766643 |  |
| 17     | 1      | 0      | 0.922775                | -0.126772 | -1.155684 |  |
| 18     | 8      | 0      | 2.676310                | 1.029841  | 1.486470  |  |
| 19     | 1      | 0      | 1.824663                | 1.347740  | 1.875396  |  |
| 20     | 1      | 0      | 2.887379                | 0.232203  | 2.014796  |  |
| 21     | 8      | 0      | 2.507348                | -1.535128 | 2.793493  |  |
| 22     | 1      | 0      | 3.157680                | -1.883959 | 3.422000  |  |
| 23     | 1      | 0      | -4.909224               | -1.286519 | -0.391838 |  |
| 24     | 8      | 0      | -4.849650               | -0.493422 | 0.210116  |  |
| 25     | 1      | 0      | -5.615682               | 0.062279  | 0.001041  |  |
| 26     | 1      | 0      | -2.552232               | 0.289945  | 1.749155  |  |
| 27     | 8      | 0      | -3.204957               | 0.004744  | 2.439971  |  |
| 28     | 1      | 0      | -3.966154               | -0.302217 | 1.906129  |  |
| 29     | 1      | 0      | 2.690517                | -2.003081 | 1.917151  |  |
| 30     | 8      | 0      | 2.880282                | -2.538894 | 0.359649  |  |
| 31     | 1      | 0      | 3.826475                | -2.522328 | 0.052095  |  |
| 32     | 1      | 0      | 5.378856                | 2.619285  | 0.420472  |  |
| 33     | 8      | 0      | 4.581850                | 2.348101  | -0.057485 |  |
| 34     | 1      | 0      | 3.956146                | 1.996602  | 0.615917  |  |
| 35     | 1      | 0      | -0.957159               | -1.175078 | 0.726215  |  |

|    |    |   |           |           |           |
|----|----|---|-----------|-----------|-----------|
| 36 | 8  | 0 | -0.745815 | -2.027212 | 1.218041  |
| 37 | 1  | 0 | -1.614661 | -2.427100 | 1.380485  |
| 38 | 1  | 0 | 5.825087  | -2.664788 | -1.208474 |
| 39 | 8  | 0 | 5.393963  | -2.075362 | -0.572158 |
| 40 | 1  | 0 | 5.179014  | -1.236233 | -1.070529 |
| 41 | 1  | 0 | 1.573641  | -3.869709 | 0.068755  |
| 42 | 8  | 0 | 0.649709  | -4.185529 | -0.022179 |
| 43 | 1  | 0 | 0.124080  | -3.450350 | 0.363941  |
| 44 | 1  | 0 | -1.625558 | -1.324940 | -1.788027 |
| 45 | 8  | 0 | -2.083952 | -2.187755 | -1.861477 |
| 46 | 1  | 0 | -1.431650 | -2.841401 | -2.211608 |
| 47 | 1  | 0 | -0.457362 | -4.916626 | -2.933193 |
| 48 | 8  | 0 | -0.190627 | -4.051905 | -2.589330 |
| 49 | 1  | 0 | 0.181727  | -4.209129 | -1.678966 |
| 50 | 1  | 0 | -0.236603 | 1.889657  | 3.004690  |
| 51 | 8  | 0 | 0.170765  | 1.158183  | 2.516752  |
| 52 | 1  | 0 | -0.400361 | 1.028908  | 1.667945  |
| 53 | 1  | 0 | -2.098757 | -1.299918 | 5.135041  |
| 54 | 8  | 0 | -1.735837 | -1.332600 | 4.239125  |
| 55 | 1  | 0 | -2.398646 | -0.875947 | 3.644121  |
| 56 | 1  | 0 | 4.672354  | 0.967129  | -1.303807 |
| 57 | 8  | 0 | 4.506713  | 0.148645  | -1.824371 |
| 58 | 1  | 0 | 3.536789  | 0.019669  | -1.766585 |
| 59 | 1  | 0 | 2.434046  | -1.837945 | -0.182216 |
| 60 | 8  | 0 | 1.848894  | -0.305621 | -0.866324 |
| 61 | 1  | 0 | 2.015440  | 0.268775  | -0.084034 |
| 62 | 11 | 0 | 0.222065  | -1.112551 | 3.110585  |
| 63 | 6  | 0 | -1.239777 | 4.883045  | 0.292252  |
| 64 | 6  | 0 | 0.084322  | 5.185185  | -0.032984 |
| 65 | 1  | 0 | -2.780381 | 3.371456  | 0.298288  |
| 66 | 1  | 0 | 1.024894  | 2.170963  | -1.283624 |
| 67 | 1  | 0 | 1.924102  | 4.420084  | -0.867825 |
| 68 | 1  | 0 | -1.882946 | 5.646487  | 0.723023  |
| 69 | 1  | 0 | 0.479200  | 6.181788  | 0.146401  |
| 70 | 1  | 0 | -0.181111 | -0.904099 | -3.918771 |
| 71 | 1  | 0 | -0.239546 | 0.500678  | -4.997227 |
| 72 | 1  | 0 | 0.987006  | 0.419632  | -3.719404 |

-----  
SCF Done: E(RB+HF-LYP) = -1960.70487010 A.U. after 1 cycles

Conv = 0.1911D-08 -V/T = 2.0090

S\*\*2 = 0.0000

Zero-point correction= 0.596904 (a.u.)

Thermal correction to Energy= 0.648209

Thermal correction to Enthalpy= 0.649154

Thermal correction to Gibbs Free Energy= 0.510905

Sum of electronic and zero-point Energies= -1960.107966

Sum of electronic and thermal Energies= -1960.056661  
 Sum of electronic and thermal Enthalpies= -1960.055717  
 Sum of electronic and thermal Free Energies= -1960.193966

(7-4) TS2(es), formation of EtOH, PhCOOH + NaOH(H2O)15  
 zuka02bbbn.chk Stoichiometry C9H43NaO19

Standard orientation:

| -----  |        |        |                         |           |           |  |
|--------|--------|--------|-------------------------|-----------|-----------|--|
| Center | Atomic | Atomic | Coordinates (Angstroms) |           |           |  |
| Number | Number | Type   | X                       | Y         | Z         |  |
| -----  |        |        |                         |           |           |  |
| 1      | 6      | 0      | 0.264441                | 2.916402  | -0.232370 |  |
| 2      | 6      | 0      | 1.257926                | 1.797084  | -0.243932 |  |
| 3      | 8      | 0      | 1.159125                | 0.825579  | -1.073173 |  |
| 4      | 8      | 0      | 0.635771                | 0.830893  | 1.431269  |  |
| 5      | 6      | 0      | 0.526279                | 1.645891  | 2.587959  |  |
| 6      | 6      | 0      | 0.589225                | 4.159294  | 0.329195  |  |
| 7      | 6      | 0      | -1.000322               | 2.740334  | -0.807394 |  |
| 8      | 6      | 0      | -1.932016               | 3.776178  | -0.812193 |  |
| 9      | 6      | 0      | 0.046353                | 0.856105  | 3.808637  |  |
| 10     | 1      | 0      | 1.503749                | 2.105209  | 2.808844  |  |
| 11     | 1      | 0      | -0.180909               | 2.468332  | 2.401239  |  |
| 12     | 8      | 0      | 2.479006                | 2.185882  | 0.162073  |  |
| 13     | 1      | 0      | 3.165742                | 1.511820  | -0.064035 |  |
| 14     | 1      | 0      | 5.482759                | -1.570803 | 1.725637  |  |
| 15     | 8      | 0      | 5.076656                | -0.691776 | 1.743120  |  |
| 16     | 1      | 0      | 4.105769                | -0.837641 | 1.931041  |  |
| 17     | 1      | 0      | -0.817335               | 0.172993  | 1.074750  |  |
| 18     | 8      | 0      | -2.692156               | -0.401145 | -1.982327 |  |
| 19     | 1      | 0      | -1.950520               | -0.168428 | -2.582546 |  |
| 20     | 1      | 0      | -2.680122               | -1.380400 | -1.978241 |  |
| 21     | 8      | 0      | -1.820411               | -3.147246 | -1.840365 |  |
| 22     | 1      | 0      | -2.309793               | -3.896902 | -2.212250 |  |
| 23     | 1      | 0      | 4.986019                | 0.144147  | 0.289754  |  |
| 24     | 8      | 0      | 4.759444                | 0.692146  | -0.516380 |  |
| 25     | 1      | 0      | 5.420904                | 1.399863  | -0.557453 |  |
| 26     | 1      | 0      | 2.520684                | 0.293141  | -2.204987 |  |
| 27     | 8      | 0      | 3.237797                | -0.079116 | -2.767764 |  |
| 28     | 1      | 0      | 4.012895                | -0.017598 | -2.173387 |  |
| 29     | 1      | 0      | -2.031436               | -3.144281 | -0.850013 |  |
| 30     | 8      | 0      | -2.303888               | -2.880519 | 0.747938  |  |
| 31     | 1      | 0      | -3.260141               | -2.888675 | 1.021968  |  |
| 32     | 1      | 0      | -5.693636               | 0.942603  | -1.624331 |  |
| 33     | 8      | 0      | -4.860014               | 1.154656  | -1.179600 |  |
| 34     | 1      | 0      | -4.169902               | 0.595600  | -1.602791 |  |
| 35     | 1      | 0      | 1.063858                | -0.892108 | -0.472574 |  |

|    |    |   |           |           |           |
|----|----|---|-----------|-----------|-----------|
| 36 | 8  | 0 | 1.236812  | -1.859165 | -0.366078 |
| 37 | 1  | 0 | 1.866000  | -1.827916 | 0.398432  |
| 38 | 1  | 0 | -5.286512 | -2.761571 | 2.236269  |
| 39 | 8  | 0 | -4.917775 | -2.472563 | 1.388530  |
| 40 | 1  | 0 | -4.853511 | -1.474935 | 1.439483  |
| 41 | 1  | 0 | -0.833811 | -3.802958 | 1.364416  |
| 42 | 8  | 0 | 0.129664  | -3.998296 | 1.381131  |
| 43 | 1  | 0 | 0.487027  | -3.342186 | 0.750956  |
| 44 | 1  | 0 | 1.772745  | -0.327180 | 1.820711  |
| 45 | 8  | 0 | 2.432104  | -1.092440 | 1.936770  |
| 46 | 1  | 0 | 2.083560  | -1.676339 | 2.653869  |
| 47 | 1  | 0 | 1.841405  | -3.659512 | 4.097692  |
| 48 | 8  | 0 | 1.330838  | -2.993786 | 3.614923  |
| 49 | 1  | 0 | 0.840544  | -3.474665 | 2.897372  |
| 50 | 1  | 0 | 0.209302  | 0.043461  | -3.934952 |
| 51 | 8  | 0 | -0.185653 | -0.218469 | -3.088714 |
| 52 | 1  | 0 | 0.242186  | 0.353543  | -2.388821 |
| 53 | 1  | 0 | 2.767422  | -2.907516 | -4.255614 |
| 54 | 8  | 0 | 2.158542  | -2.359524 | -3.741568 |
| 55 | 1  | 0 | 2.683989  | -1.576840 | -3.409965 |
| 56 | 1  | 0 | -4.714001 | 0.616143  | 0.617708  |
| 57 | 8  | 0 | -4.452106 | 0.181811  | 1.459790  |
| 58 | 1  | 0 | -3.469115 | 0.197192  | 1.448271  |
| 59 | 1  | 0 | -2.011540 | -1.935291 | 0.890467  |
| 60 | 8  | 0 | -1.719650 | -0.243227 | 0.840172  |
| 61 | 1  | 0 | -1.884701 | -0.067001 | -0.106162 |
| 62 | 11 | 0 | 0.363636  | -2.451241 | -2.361502 |
| 63 | 6  | 0 | -0.339724 | 5.199915  | 0.316461  |
| 64 | 6  | 0 | -1.601747 | 5.011304  | -0.249161 |
| 65 | 1  | 0 | 1.569363  | 4.304924  | 0.768095  |
| 66 | 1  | 0 | -1.259096 | 1.786044  | -1.249338 |
| 67 | 1  | 0 | -2.913527 | 3.612502  | -1.248004 |
| 68 | 1  | 0 | -0.076053 | 6.159609  | 0.752821  |
| 69 | 1  | 0 | -2.326092 | 5.821373  | -0.250511 |
| 70 | 1  | 0 | -0.935428 | 0.406276  | 3.622159  |
| 71 | 1  | 0 | 0.741682  | 0.052042  | 4.073875  |
| 72 | 1  | 0 | -0.045775 | 1.522974  | 4.675485  |

-----  
SCF Done: E(RB+HF-LYP) = -1960.69501668 A.U. after 1 cycles

Conv = 0.2003D-08 -V/T = 2.0090

S\*\*2 = 0.0000

Zero-point correction= 0.595022 (a.u.)

Thermal correction to Energy= 0.646997

Thermal correction to Enthalpy= 0.647941

Thermal correction to Gibbs Free Energy= 0.507690

Sum of electronic and zero-point Energies= -1960.099995

Sum of electronic and thermal Energies= -1960.048019  
 Sum of electronic and thermal Enthalpies= -1960.047075  
 Sum of electronic and thermal Free Energies= -1960.187326

(7-5) Ph-COOH + EtOH + NaOH(H2O)15 Int2(es)

zuka02bbbna.for.chk Stoichiometry C9H43NaO19

Standard orientation:

| -----  |        |        |                         |           |           |  |
|--------|--------|--------|-------------------------|-----------|-----------|--|
| Center | Atomic | Atomic | Coordinates (Angstroms) |           |           |  |
| Number | Number | Type   | X                       | Y         | Z         |  |
| -----  |        |        |                         |           |           |  |
| 1      | 6      | 0      | -0.854018               | 2.991336  | -0.585219 |  |
| 2      | 6      | 0      | -2.030787               | 2.312112  | -0.003303 |  |
| 3      | 8      | 0      | -2.091434               | 1.929194  | 1.178325  |  |
| 4      | 8      | 0      | -0.033532               | -0.328770 | -2.745544 |  |
| 5      | 6      | 0      | 0.745953                | -0.419190 | -3.941071 |  |
| 6      | 6      | 0      | -0.805551               | 3.290197  | -1.956456 |  |
| 7      | 6      | 0      | 0.245747                | 3.297046  | 0.233326  |  |
| 8      | 6      | 0      | 1.386759                | 3.878497  | -0.312404 |  |
| 9      | 6      | 0      | 1.604723                | -1.679355 | -4.000044 |  |
| 10     | 1      | 0      | 0.030323                | -0.401059 | -4.770692 |  |
| 11     | 1      | 0      | 1.376461                | 0.476789  | -4.029809 |  |
| 12     | 8      | 0      | -3.035321               | 2.131844  | -0.848206 |  |
| 13     | 1      | 0      | -3.745550               | 1.534300  | -0.475447 |  |
| 14     | 1      | 0      | -4.961317               | -2.460160 | -1.719194 |  |
| 15     | 8      | 0      | -4.539827               | -1.603578 | -1.882161 |  |
| 16     | 1      | 0      | -3.561506               | -1.793544 | -1.978529 |  |
| 17     | 1      | 0      | 0.574809                | -0.278849 | -1.944496 |  |
| 18     | 8      | 0      | 2.436430                | 0.984222  | 3.297074  |  |
| 19     | 1      | 0      | 1.488677                | 1.222526  | 3.286624  |  |
| 20     | 1      | 0      | 2.422123                | 0.004945  | 3.244550  |  |
| 21     | 8      | 0      | 1.813071                | -1.809457 | 3.081044  |  |
| 22     | 1      | 0      | 2.196096                | -2.395305 | 3.751272  |  |
| 23     | 1      | 0      | -4.851505               | -0.385158 | -0.801194 |  |
| 24     | 8      | 0      | -5.007699               | 0.381915  | -0.169563 |  |
| 25     | 1      | 0      | -5.870498               | 0.754324  | -0.409497 |  |
| 26     | 1      | 0      | -3.388605               | 0.933521  | 2.087491  |  |
| 27     | 8      | 0      | -4.013876               | 0.295415  | 2.493538  |  |
| 28     | 1      | 0      | -4.576034               | 0.047871  | 1.732884  |  |
| 29     | 1      | 0      | 2.244581                | -2.071681 | 2.198170  |  |
| 30     | 8      | 0      | 2.739698                | -2.326412 | 0.684084  |  |
| 31     | 1      | 0      | 3.709304                | -2.215542 | 0.514757  |  |
| 32     | 1      | 0      | 4.814537                | 2.452636  | 1.785608  |  |
| 33     | 8      | 0      | 3.943721                | 2.296703  | 1.390787  |  |
| 34     | 1      | 0      | 3.423464                | 1.813563  | 2.082233  |  |
| 35     | 1      | 0      | 0.162251                | -1.158793 | 0.081002  |  |

|    |    |   |           |           |           |
|----|----|---|-----------|-----------|-----------|
| 36 | 8  | 0 | -0.596834 | -1.699517 | 0.507724  |
| 37 | 1  | 0 | -1.249021 | -1.813023 | -0.221526 |
| 38 | 1  | 0 | 5.792861  | -2.055912 | -0.669067 |
| 39 | 8  | 0 | 5.314287  | -1.598409 | 0.037491  |
| 40 | 1  | 0 | 4.968839  | -0.748790 | -0.361962 |
| 41 | 1  | 0 | 1.592838  | -3.828632 | 0.181441  |
| 42 | 8  | 0 | 0.676032  | -4.175354 | 0.138715  |
| 43 | 1  | 0 | 0.151790  | -3.371850 | 0.367815  |
| 44 | 1  | 0 | -1.266415 | -1.445652 | -2.365801 |
| 45 | 8  | 0 | -1.903051 | -2.090657 | -1.940235 |
| 46 | 1  | 0 | -1.539055 | -2.989037 | -2.140117 |
| 47 | 1  | 0 | -0.949770 | -5.386981 | -2.307042 |
| 48 | 8  | 0 | -0.575862 | -4.496364 | -2.244569 |
| 49 | 1  | 0 | -0.016392 | -4.483617 | -1.419515 |
| 50 | 1  | 0 | -0.934611 | 1.171466  | 3.954845  |
| 51 | 8  | 0 | -0.433695 | 0.992782  | 3.143173  |
| 52 | 1  | 0 | -0.940475 | 1.432094  | 2.416956  |
| 53 | 1  | 0 | -2.912554 | -2.058034 | 4.394003  |
| 54 | 8  | 0 | -2.421859 | -1.446301 | 3.827647  |
| 55 | 1  | 0 | -3.099060 | -0.884940 | 3.358917  |
| 56 | 1  | 0 | 4.051506  | 1.238247  | -0.158570 |
| 57 | 8  | 0 | 4.043918  | 0.585047  | -0.894002 |
| 58 | 1  | 0 | 3.112662  | 0.249019  | -0.919069 |
| 59 | 1  | 0 | 2.294276  | -1.556252 | 0.202008  |
| 60 | 8  | 0 | 1.406313  | -0.342454 | -0.492924 |
| 61 | 1  | 0 | 1.301202  | 0.503448  | -0.028468 |
| 62 | 11 | 0 | -0.445083 | -1.345807 | 2.700060  |
| 63 | 6  | 0 | 0.331573  | 3.886535  | -2.495505 |
| 64 | 6  | 0 | 1.427792  | 4.173588  | -1.678673 |
| 65 | 1  | 0 | -1.647318 | 3.034933  | -2.588937 |
| 66 | 1  | 0 | 0.205588  | 3.077386  | 1.294815  |
| 67 | 1  | 0 | 2.246220  | 4.075752  | 0.320012  |
| 68 | 1  | 0 | 0.368684  | 4.111896  | -3.557251 |
| 69 | 1  | 0 | 2.321195  | 4.619433  | -2.106704 |
| 70 | 1  | 0 | 2.333971  | -1.688499 | -3.182123 |
| 71 | 1  | 0 | 0.987406  | -2.580632 | -3.916646 |
| 72 | 1  | 0 | 2.156947  | -1.721714 | -4.947492 |

-----  
SCF Done: E(RB+HF-LYP) = -1960.72805199 A.U. after 1 cycles

Conv = 0.6559D-08 -V/T = 2.0091

S\*\*2 = 0.0000

Zero-point correction= 0.595573 (a.u.)

Thermal correction to Energy= 0.648765

Thermal correction to Enthalpy= 0.649710

Thermal correction to Gibbs Free Energy= 0.503345

Sum of electronic and zero-point Energies= -1960.132479

Sum of electronic and thermal Energies= -1960.079287  
 Sum of electronic and thermal Enthalpies= -1960.078342  
 Sum of electronic and thermal Free Energies= -1960.224707

(7-6) The electrolytic dissociation of Ph-COOH, TS3(es),  
 the last step formation of the benzoate anion

zukaphxn.chk Stoichiometry C9H43NaO19

Standard orientation:

| Center<br>Number | Atomic<br>Number | Atomic<br>Type | Coordinates (Angstroms) |           |           |
|------------------|------------------|----------------|-------------------------|-----------|-----------|
|                  |                  |                | X                       | Y         | Z         |
| 1                | 6                | 0              | -3.966833               | 1.204400  | -0.337315 |
| 2                | 6                | 0              | -3.128389               | 0.276158  | -1.148590 |
| 3                | 8                | 0              | -3.659693               | -0.511334 | -1.965825 |
| 4                | 8                | 0              | 0.712398                | -1.722139 | 2.029541  |
| 5                | 6                | 0              | 1.284255                | -2.242737 | 3.241788  |
| 6                | 6                | 0              | -5.178539               | 1.672897  | -0.867483 |
| 7                | 6                | 0              | -5.972250               | 2.545033  | -0.125863 |
| 8                | 6                | 0              | -5.571759               | 2.933098  | 1.156071  |
| 9                | 1                | 0              | 1.193355                | -1.490323 | 4.035969  |
| 10               | 1                | 0              | 2.353349                | -2.445997 | 3.084032  |
| 11               | 6                | 0              | 0.548026                | -3.514042 | 3.627848  |
| 12               | 8                | 0              | -1.844980               | 0.348396  | -0.950741 |
| 13               | 1                | 0              | 0.790563                | 1.526236  | -1.457635 |
| 14               | 1                | 0              | -1.198817               | -0.436070 | -1.503114 |
| 15               | 8                | 0              | -0.336813               | -1.195064 | -2.093413 |
| 16               | 1                | 0              | -0.819893               | -1.584231 | -2.862457 |
| 17               | 1                | 0              | -1.123473               | -1.143374 | 2.360783  |
| 18               | 8                | 0              | -1.977530               | -0.770595 | 2.651136  |
| 19               | 1                | 0              | -2.659800               | -1.402439 | 2.343316  |
| 20               | 8                | 0              | 0.460353                | 2.014927  | -0.632655 |
| 21               | 1                | 0              | 1.316011                | 1.145833  | 0.679574  |
| 22               | 1                | 0              | -0.483841               | 1.765250  | -0.566799 |
| 23               | 8                | 0              | 1.347418                | 0.485332  | -2.590009 |
| 24               | 1                | 0              | 0.463177                | -0.454584 | -2.442779 |
| 25               | 1                | 0              | 1.396917                | 0.797466  | -3.505204 |
| 26               | 1                | 0              | 0.481253                | -2.444986 | -1.052273 |
| 27               | 8                | 0              | 0.950716                | -3.050890 | -0.428980 |
| 28               | 1                | 0              | 0.821964                | -2.657150 | 0.465661  |
| 29               | 8                | 0              | 1.950003                | 0.589423  | 1.200152  |
| 30               | 1                | 0              | 1.158408                | -0.869028 | 1.800606  |
| 31               | 1                | 0              | 2.403214                | 1.193629  | 1.839259  |
| 32               | 1                | 0              | -2.869523               | -1.464471 | -3.284748 |
| 33               | 8                | 0              | -2.266186               | -1.944924 | -3.901460 |
| 34               | 1                | 0              | -2.590971               | -2.856780 | -3.936525 |

|    |    |   |           |           |           |
|----|----|---|-----------|-----------|-----------|
| 35 | 8  | 0 | 3.332936  | 2.351976  | 2.803377  |
| 36 | 1  | 0 | 2.815500  | 2.893390  | 3.417854  |
| 37 | 1  | 0 | 3.725290  | 2.972608  | 2.145000  |
| 38 | 8  | 0 | 4.253881  | 3.887959  | 0.673613  |
| 39 | 1  | 0 | 3.400272  | 4.091015  | 0.196908  |
| 40 | 1  | 0 | 4.696466  | 4.739038  | 0.812000  |
| 41 | 1  | 0 | -4.857796 | -1.628458 | -1.185969 |
| 42 | 8  | 0 | -5.356830 | -2.296525 | -0.661589 |
| 43 | 1  | 0 | -6.222931 | -1.900426 | -0.484513 |
| 44 | 1  | 0 | -4.435882 | -2.566436 | 0.881547  |
| 45 | 8  | 0 | -3.928615 | -2.703946 | 1.715909  |
| 46 | 1  | 0 | -3.613073 | -3.618528 | 1.679738  |
| 47 | 1  | 0 | 2.707348  | 0.182231  | -1.769383 |
| 48 | 8  | 0 | 3.435080  | 0.049933  | -1.077702 |
| 49 | 1  | 0 | 2.973084  | 0.207585  | -0.216785 |
| 50 | 1  | 0 | 1.253075  | 3.561069  | -0.513407 |
| 51 | 8  | 0 | 1.840338  | 4.362123  | -0.470282 |
| 52 | 1  | 0 | 1.779401  | 4.778520  | -1.342688 |
| 53 | 11 | 0 | 4.751515  | -1.736215 | -0.948532 |
| 54 | 8  | 0 | 6.636007  | -0.578739 | -0.540176 |
| 55 | 1  | 0 | 7.597916  | -0.643514 | -0.465460 |
| 56 | 1  | 0 | 6.410009  | 0.392511  | -0.602031 |
| 57 | 8  | 0 | 3.505974  | -3.557284 | -0.885139 |
| 58 | 1  | 0 | 2.523302  | -3.368386 | -0.741173 |
| 59 | 1  | 0 | 3.582244  | -4.518222 | -0.964312 |
| 60 | 8  | 0 | 5.522432  | 1.826847  | -0.961152 |
| 61 | 1  | 0 | 4.677431  | 1.337732  | -1.118850 |
| 62 | 1  | 0 | 5.277289  | 2.553500  | -0.353497 |
| 63 | 6  | 0 | -3.565805 | 1.591968  | 0.949960  |
| 64 | 6  | 0 | -4.377641 | 2.448463  | 1.693902  |
| 65 | 1  | 0 | -5.477565 | 1.360849  | -1.863710 |
| 66 | 1  | 0 | -6.901647 | 2.921289  | -0.544906 |
| 67 | 1  | 0 | -6.196339 | 3.606046  | 1.738018  |
| 68 | 1  | 0 | -2.666211 | 1.168205  | 1.386717  |
| 69 | 1  | 0 | -4.079047 | 2.727261  | 2.700390  |
| 70 | 1  | 0 | -0.510690 | -3.303583 | 3.810567  |
| 71 | 1  | 0 | 0.623437  | -4.264417 | 2.832934  |
| 72 | 1  | 0 | 0.979055  | -3.936735 | 4.542467  |

-----  
SCF Done: E(RB+HF-LYP) = -1960.71330345 A.U. after 2 cycles

Conv = 0.7316D-08 -V/T = 2.0090

S\*\*2 = 0.0000

Zero-point correction= 0.587591 (a.u.)

Thermal correction to Energy= 0.641530

Thermal correction to Enthalpy= 0.642475

Thermal correction to Gibbs Free Energy= 0.491106



Sum of electronic and zero-point Energies= -1960.125713  
 Sum of electronic and thermal Energies= -1960.071773  
 Sum of electronic and thermal Enthalpies= -1960.070829  
 Sum of electronic and thermal Free Energies= -1960.222198

(7-7) Product of Ph-COO-, EtOH, Na+ and (H2O)16, i.e.,  
 after the last step formation of the benzoate anion  
 zukaphxnr.for.chk Stoichiometry C9H43NaO19  
 Standard orientation:

| Center<br>Number | Atomic<br>Number | Atomic<br>Type | Coordinates (Angstroms) |           |           |
|------------------|------------------|----------------|-------------------------|-----------|-----------|
|                  |                  |                | X                       | Y         | Z         |
| 1                | 6                | 0              | -3.827094               | 1.060530  | -0.440231 |
| 2                | 6                | 0              | -3.032509               | -0.006675 | -1.142231 |
| 3                | 8                | 0              | -3.667233               | -0.905291 | -1.774267 |
| 4                | 8                | 0              | 0.818185                | -1.845972 | 1.845287  |
| 5                | 6                | 0              | 1.393965                | -2.218747 | 3.110160  |
| 6                | 6                | 0              | -5.038568               | 1.503655  | -0.990081 |
| 7                | 6                | 0              | -5.772768               | 2.505019  | -0.355368 |
| 8                | 6                | 0              | -5.314879               | 3.050969  | 0.846845  |
| 9                | 1                | 0              | 1.203282                | -1.422408 | 3.840613  |
| 10               | 1                | 0              | 2.482573                | -2.331295 | 2.999080  |
| 11               | 6                | 0              | 0.764276                | -3.522254 | 3.568671  |
| 12               | 8                | 0              | -1.763168               | 0.049983  | -1.065950 |
| 13               | 1                | 0              | 0.598967                | 1.436134  | -1.743014 |
| 14               | 1                | 0              | -0.777784               | -1.148457 | -1.730344 |
| 15               | 8                | 0              | -0.156153               | -1.729727 | -2.263921 |
| 16               | 1                | 0              | -0.790605               | -2.197928 | -2.865725 |
| 17               | 1                | 0              | -0.990865               | -1.133964 | 2.325539  |
| 18               | 8                | 0              | -1.685347               | -0.620469 | 2.777104  |
| 19               | 1                | 0              | -2.519786               | -1.111168 | 2.621939  |
| 20               | 8                | 0              | 0.209193                | 1.783478  | -0.909661 |
| 21               | 1                | 0              | 1.166366                | 1.002401  | 0.380674  |
| 22               | 1                | 0              | -0.671588               | 1.307948  | -0.850935 |
| 23               | 8                | 0              | 1.365279                | 0.281846  | -3.052643 |
| 24               | 1                | 0              | 0.796129                | -0.537663 | -2.898384 |
| 25               | 1                | 0              | 1.309661                | 0.494617  | -3.996303 |
| 26               | 1                | 0              | 0.819899                | -2.803630 | -1.161286 |
| 27               | 8                | 0              | 1.366131                | -3.275359 | -0.487077 |
| 28               | 1                | 0              | 1.121783                | -2.866144 | 0.377242  |
| 29               | 8                | 0              | 1.879595                | 0.525117  | 0.877813  |
| 30               | 1                | 0              | 1.193310                | -0.977534 | 1.561273  |
| 31               | 1                | 0              | 2.213108                | 1.153720  | 1.568520  |
| 32               | 1                | 0              | -2.917238               | -1.961840 | -2.939868 |
| 33               | 8                | 0              | -2.399218               | -2.545138 | -3.561035 |

|    |    |   |           |           |           |
|----|----|---|-----------|-----------|-----------|
| 34 | 1  | 0 | -2.771299 | -3.433432 | -3.458531 |
| 35 | 8  | 0 | 2.864102  | 2.345595  | 2.676449  |
| 36 | 1  | 0 | 2.191196  | 2.721611  | 3.263923  |
| 37 | 1  | 0 | 3.175982  | 3.080041  | 2.098850  |
| 38 | 8  | 0 | 3.620864  | 4.133009  | 0.679069  |
| 39 | 1  | 0 | 2.744318  | 4.254688  | 0.220764  |
| 40 | 1  | 0 | 3.969678  | 5.021988  | 0.844391  |
| 41 | 1  | 0 | -4.867511 | -1.711868 | -0.758660 |
| 42 | 8  | 0 | -5.451899 | -2.153093 | -0.091111 |
| 43 | 1  | 0 | -6.223794 | -1.573694 | -0.007582 |
| 44 | 1  | 0 | -4.560804 | -2.154988 | 1.467144  |
| 45 | 8  | 0 | -4.084062 | -2.151124 | 2.333390  |
| 46 | 1  | 0 | -4.079987 | -3.071502 | 2.633029  |
| 47 | 1  | 0 | 2.844413  | 0.188550  | -2.044855 |
| 48 | 8  | 0 | 3.486943  | 0.208443  | -1.296142 |
| 49 | 1  | 0 | 2.923800  | 0.325422  | -0.482747 |
| 50 | 1  | 0 | 0.686249  | 3.416805  | -0.573836 |
| 51 | 8  | 0 | 1.121254  | 4.284173  | -0.359739 |
| 52 | 1  | 0 | 0.732827  | 4.942988  | -0.952947 |
| 53 | 11 | 0 | 4.956758  | -1.400259 | -0.750542 |
| 54 | 8  | 0 | 6.531922  | 0.029121  | -0.051781 |
| 55 | 1  | 0 | 7.424538  | 0.089187  | 0.315370  |
| 56 | 1  | 0 | 6.215897  | 0.962291  | -0.215170 |
| 57 | 8  | 0 | 3.983689  | -3.375337 | -0.773505 |
| 58 | 1  | 0 | 2.974564  | -3.346804 | -0.698288 |
| 59 | 1  | 0 | 4.219977  | -4.312846 | -0.804065 |
| 60 | 8  | 0 | 5.280166  | 2.279807  | -0.821593 |
| 61 | 1  | 0 | 4.557120  | 1.709954  | -1.169219 |
| 62 | 1  | 0 | 4.829244  | 2.953645  | -0.271432 |
| 63 | 6  | 0 | -3.369736 | 1.610352  | 0.766059  |
| 64 | 6  | 0 | -4.120722 | 2.594955  | 1.409395  |
| 65 | 1  | 0 | -5.386724 | 1.065788  | -1.921028 |
| 66 | 1  | 0 | -6.701931 | 2.857765  | -0.795869 |
| 67 | 1  | 0 | -5.892980 | 3.823518  | 1.347785  |
| 68 | 1  | 0 | -2.463269 | 1.224183  | 1.223651  |
| 69 | 1  | 0 | -3.775039 | 2.998610  | 2.357199  |
| 70 | 1  | 0 | -0.315189 | -3.398656 | 3.701120  |
| 71 | 1  | 0 | 0.937081  | -4.319031 | 2.836681  |
| 72 | 1  | 0 | 1.196351  | -3.833460 | 4.526447  |

-----  
SCF Done: E(RB+HF-LYP) = -1960.72927973 A.U. after 1 cycles

Conv = 0.3955D-08 -V/T = 2.0090

S\*\*2 = 0.0000

Zero-point correction= 0.594166 (a.u)

Thermal correction to Energy= 0.649193

Thermal correction to Enthalpy= 0.650137

|                                              |              |
|----------------------------------------------|--------------|
| Thermal correction to Gibbs Free Energy=     | 0.495482     |
| Sum of electronic and zero-point Energies=   | -1960.135114 |
| Sum of electronic and thermal Energies=      | -1960.080087 |
| Sum of electronic and thermal Enthalpies=    | -1960.079143 |
| Sum of electronic and thermal Free Energies= | -1960.233798 |

---

[8] The Na<sup>+</sup>-containing amide hydrolysis shown in Figure S4.

(8-1) Reactant-like complex (precursor) composed of  
N-ethyl benzamide and NaOH(H<sub>2</sub>O)<sub>16</sub>  
tuka02aana.rev.chk Stoichiometry C<sub>9</sub>H<sub>44</sub>NNaO<sub>18</sub>  
standard orientation:

---

|    |   |   |           |           |           |
|----|---|---|-----------|-----------|-----------|
| 1  | 6 | 0 | 2.204289  | 1.953649  | 0.663871  |
| 2  | 6 | 0 | 1.636890  | 1.521096  | -0.655192 |
| 3  | 8 | 0 | 1.973942  | 0.405934  | -1.142297 |
| 4  | 7 | 0 | 0.799702  | 2.360766  | -1.263101 |
| 5  | 6 | 0 | 0.138148  | 2.099224  | -2.544111 |
| 6  | 6 | 0 | 1.383618  | 2.446986  | 1.687239  |
| 7  | 6 | 0 | 3.582425  | 1.812315  | 0.886744  |
| 8  | 6 | 0 | 4.136364  | 2.174988  | 2.113843  |
| 9  | 1 | 0 | 0.540199  | 3.241249  | -0.801229 |
| 10 | 6 | 0 | 0.387100  | 3.233031  | -3.539564 |
| 11 | 1 | 0 | 0.517379  | 1.151044  | -2.927638 |
| 12 | 1 | 0 | -0.935674 | 1.981507  | -2.357706 |
| 13 | 8 | 0 | -1.738903 | 0.609911  | 1.144823  |
| 14 | 1 | 0 | -2.382778 | 0.349146  | 1.838150  |
| 15 | 1 | 0 | -2.031675 | 0.146298  | 0.269314  |
| 16 | 8 | 0 | -2.393217 | -0.525219 | -1.087587 |
| 17 | 1 | 0 | -2.707315 | 0.195540  | -1.660897 |
| 18 | 1 | 0 | -3.592077 | -1.315022 | -0.779296 |
| 19 | 8 | 0 | -4.500763 | -1.782953 | -0.501510 |
| 20 | 1 | 0 | -4.641810 | -2.515702 | -1.120353 |
| 21 | 1 | 0 | -5.577011 | -0.465841 | -0.768433 |
| 22 | 8 | 0 | -6.054796 | 0.388786  | -0.957963 |
| 23 | 1 | 0 | -6.476791 | 0.649516  | -0.126004 |
| 24 | 1 | 0 | -4.231667 | -2.407506 | 1.188931  |
| 25 | 8 | 0 | -3.975714 | -2.717921 | 2.089857  |
| 26 | 1 | 0 | -3.190253 | -3.297519 | 1.946276  |
| 27 | 1 | 0 | -3.346278 | -1.457859 | 2.971287  |
| 28 | 8 | 0 | -2.858922 | -0.692565 | 3.411497  |
| 29 | 1 | 0 | -3.418044 | -0.398972 | 4.145869  |
| 30 | 1 | 0 | -4.828108 | 1.461152  | -1.548474 |
| 31 | 8 | 0 | -4.056128 | 1.995423  | -1.879706 |
| 32 | 1 | 0 | -4.389514 | 2.508993  | -2.630283 |
| 33 | 1 | 0 | -0.629180 | -0.555808 | 1.818938  |
| 34 | 8 | 0 | -0.242687 | -1.259386 | 2.413908  |
| 35 | 1 | 0 | -0.789694 | -1.165892 | 3.218391  |
| 36 | 1 | 0 | -1.035491 | -2.975042 | 1.998939  |
| 37 | 8 | 0 | -1.450795 | -3.844658 | 1.822037  |
| 38 | 1 | 0 | -1.034575 | -4.118758 | 0.978832  |
| 39 | 1 | 0 | 1.290207  | -1.871653 | 1.964238  |

|    |    |   |           |           |           |
|----|----|---|-----------|-----------|-----------|
| 40 | 8  | 0 | 2.079119  | -2.293369 | 1.523281  |
| 41 | 1  | 0 | 2.564210  | -2.751614 | 2.225824  |
| 42 | 1  | 0 | 0.490271  | -0.821434 | -1.657110 |
| 43 | 8  | 0 | -0.146752 | -1.548633 | -1.801281 |
| 44 | 1  | 0 | -1.079142 | -1.148278 | -1.584089 |
| 45 | 1  | 0 | 0.645121  | -2.826686 | -2.928414 |
| 46 | 8  | 0 | 1.270547  | -3.576995 | -3.067192 |
| 47 | 1  | 0 | 1.085258  | -4.134437 | -2.283993 |
| 48 | 1  | 0 | 0.106065  | -2.955638 | -0.745093 |
| 49 | 8  | 0 | 0.397635  | -3.819869 | -0.351899 |
| 50 | 1  | 0 | 1.048488  | -3.565059 | 0.329834  |
| 51 | 1  | 0 | -2.314783 | 2.277040  | 0.677967  |
| 52 | 8  | 0 | -2.684065 | 3.121216  | 0.321576  |
| 53 | 1  | 0 | -3.213983 | 2.844058  | -0.459024 |
| 54 | 1  | 0 | -1.425873 | 4.175166  | -0.093917 |
| 55 | 8  | 0 | -0.598799 | 4.664752  | -0.371051 |
| 56 | 1  | 0 | -0.499165 | 5.408591  | 0.239793  |
| 57 | 1  | 0 | 2.739310  | -2.872481 | -2.757816 |
| 58 | 8  | 0 | 3.545348  | -2.339599 | -2.468406 |
| 59 | 1  | 0 | 3.722164  | -1.726105 | -3.197715 |
| 60 | 1  | 0 | 4.984998  | -2.659375 | -1.249859 |
| 61 | 8  | 0 | 5.194804  | -2.308867 | -0.358518 |
| 62 | 1  | 0 | 5.956795  | -2.795975 | -0.015218 |
| 63 | 11 | 0 | 3.084697  | -1.344755 | -0.318836 |
| 64 | 6  | 0 | 1.941459  | 2.792206  | 2.919668  |
| 65 | 6  | 0 | 3.314598  | 2.661927  | 3.133880  |
| 66 | 1  | 0 | 0.312653  | 2.524881  | 1.531384  |
| 67 | 1  | 0 | 4.221354  | 1.447922  | 0.085514  |
| 68 | 1  | 0 | 5.207683  | 2.084245  | 2.271465  |
| 69 | 1  | 0 | 1.298056  | 3.158362  | 3.714620  |
| 70 | 1  | 0 | 3.744743  | 2.938724  | 4.092523  |
| 71 | 1  | 0 | 0.030603  | 4.187966  | -3.140467 |
| 72 | 1  | 0 | 1.454727  | 3.328015  | -3.766772 |
| 73 | 1  | 0 | -0.147182 | 3.029733  | -4.474206 |

-----  
SCF Done: E(RB+HF-LYP) = -1940.85272273 A.U. after 1 cycles

Convg = 0.4247D-08 -V/T = 2.0091

S\*\*2 = 0.0000

Zero-point correction= 0.606447 (a.u.)  
Thermal correction to Energy= 0.660246  
Thermal correction to Enthalpy= 0.661190  
Thermal correction to Gibbs Free Energy= 0.513787  
Sum of electronic and zero-point Energies= -1940.246275  
Sum of electronic and thermal Energies= -1940.192477  
Sum of electronic and thermal Enthalpies= -1940.191532  
Sum of electronic and thermal Free Energies= -1940.338935

(8-2) TS1(am), OH- nucleophilic addition to the amide  
 tuka02aana.chk Stoichiometry C9H44NNaO18  
 Standard orientation:

| -----            |                  |                |                         |           |           |  |
|------------------|------------------|----------------|-------------------------|-----------|-----------|--|
| Center<br>Number | Atomic<br>Number | Atomic<br>Type | Coordinates (Angstroms) |           |           |  |
|                  |                  |                | X                       | Y         | Z         |  |
| -----            |                  |                |                         |           |           |  |
| 1                | 6                | 0              | 0.403379                | 2.335923  | 1.008445  |  |
| 2                | 6                | 0              | 0.372184                | 1.347645  | -0.151082 |  |
| 3                | 8                | 0              | 1.144645                | 0.290813  | -0.067036 |  |
| 4                | 7                | 0              | 0.284650                | 1.971109  | -1.384197 |  |
| 5                | 6                | 0              | 0.235892                | 1.204183  | -2.627991 |  |
| 6                | 6                | 0              | -0.548705               | 3.358721  | 1.136122  |  |
| 7                | 6                | 0              | 1.425911                | 2.253064  | 1.960551  |  |
| 8                | 6                | 0              | 1.501630                | 3.165908  | 3.015343  |  |
| 9                | 1                | 0              | -0.323783               | 2.788791  | -1.413459 |  |
| 10               | 6                | 0              | 0.509204                | 2.109377  | -3.828406 |  |
| 11               | 1                | 0              | 0.987948                | 0.412987  | -2.571393 |  |
| 12               | 1                | 0              | -0.740864               | 0.711558  | -2.747194 |  |
| 13               | 8                | 0              | -1.338097               | 0.648278  | 0.123234  |  |
| 14               | 1                | 0              | -1.423954               | 0.465546  | 1.080531  |  |
| 15               | 1                | 0              | -1.842981               | -0.661631 | -0.615053 |  |
| 16               | 8                | 0              | -2.176464               | -1.480843 | -1.138284 |  |
| 17               | 1                | 0              | -2.828981               | -1.125414 | -1.779541 |  |
| 18               | 1                | 0              | -3.072689               | -2.507410 | -0.182803 |  |
| 19               | 8                | 0              | -3.719759               | -3.051370 | 0.363704  |  |
| 20               | 1                | 0              | -3.645117               | -3.965332 | 0.047700  |  |
| 21               | 1                | 0              | -5.252842               | -2.262051 | -0.121865 |  |
| 22               | 8                | 0              | -5.963265               | -1.723486 | -0.551028 |  |
| 23               | 1                | 0              | -6.368815               | -1.198873 | 0.155633  |  |
| 24               | 1                | 0              | -2.927729               | -2.957397 | 2.068388  |  |
| 25               | 8                | 0              | -2.394005               | -2.855231 | 2.884469  |  |
| 26               | 1                | 0              | -1.566032               | -3.365680 | 2.721939  |  |
| 27               | 1                | 0              | -1.905005               | -1.240893 | 3.029138  |  |
| 28               | 8                | 0              | -1.480499               | -0.332100 | 3.037976  |  |
| 29               | 1                | 0              | -1.865489               | 0.153691  | 3.782156  |  |
| 30               | 1                | 0              | -5.119247               | -0.789351 | -1.751103 |  |
| 31               | 8                | 0              | -4.468675               | -0.319251 | -2.338564 |  |
| 32               | 1                | 0              | -4.847916               | -0.307425 | -3.229932 |  |
| 33               | 1                | 0              | 0.926230                | -0.599304 | 1.397003  |  |
| 34               | 8                | 0              | 1.016331                | -1.097416 | 2.256593  |  |
| 35               | 1                | 0              | 0.280801                | -0.745766 | 2.811764  |  |
| 36               | 1                | 0              | 0.527606                | -2.870642 | 2.312846  |  |
| 37               | 8                | 0              | 0.194724                | -3.792773 | 2.392964  |  |
| 38               | 1                | 0              | 0.662411                | -4.266078 | 1.679762  |  |

|    |    |   |           |           |           |
|----|----|---|-----------|-----------|-----------|
| 39 | 1  | 0 | 2.698092  | -1.425989 | 2.030105  |
| 40 | 8  | 0 | 3.469709  | -1.586561 | 1.424391  |
| 41 | 1  | 0 | 4.247167  | -1.750511 | 1.978541  |
| 42 | 1  | 0 | 0.687778  | -1.157738 | -0.955686 |
| 43 | 8  | 0 | 0.498330  | -2.040663 | -1.372258 |
| 44 | 1  | 0 | -0.482944 | -2.042407 | -1.472808 |
| 45 | 1  | 0 | 1.821867  | -2.693038 | -2.473403 |
| 46 | 8  | 0 | 2.721585  | -3.055190 | -2.653722 |
| 47 | 1  | 0 | 2.850670  | -3.657713 | -1.893126 |
| 48 | 1  | 0 | 1.362191  | -3.263783 | -0.315437 |
| 49 | 8  | 0 | 2.048486  | -3.860496 | 0.066861  |
| 50 | 1  | 0 | 2.633082  | -3.264360 | 0.573424  |
| 51 | 1  | 0 | -2.740627 | 1.524095  | -0.423363 |
| 52 | 8  | 0 | -3.503929 | 1.995292  | -0.860857 |
| 53 | 1  | 0 | -3.923515 | 1.320886  | -1.430371 |
| 54 | 1  | 0 | -2.671709 | 3.223569  | -1.748664 |
| 55 | 8  | 0 | -1.999739 | 3.840008  | -2.148158 |
| 56 | 1  | 0 | -2.350517 | 4.735020  | -2.034813 |
| 57 | 1  | 0 | 3.665398  | -1.688044 | -2.566921 |
| 58 | 8  | 0 | 4.068046  | -0.773156 | -2.443554 |
| 59 | 1  | 0 | 3.886551  | -0.301751 | -3.270802 |
| 60 | 1  | 0 | 5.586630  | -0.043505 | -1.417909 |
| 61 | 8  | 0 | 5.603335  | 0.420594  | -0.556678 |
| 62 | 1  | 0 | 6.455618  | 0.870333  | -0.472403 |
| 63 | 11 | 0 | 3.342831  | 0.004586  | -0.301964 |
| 64 | 6  | 0 | -0.472637 | 4.271781  | 2.186664  |
| 65 | 6  | 0 | 0.552685  | 4.180460  | 3.131350  |
| 66 | 1  | 0 | -1.361550 | 3.434866  | 0.422380  |
| 67 | 1  | 0 | 2.159398  | 1.456930  | 1.890233  |
| 68 | 1  | 0 | 2.301095  | 3.078163  | 3.746712  |
| 69 | 1  | 0 | -1.222980 | 5.053460  | 2.270633  |
| 70 | 1  | 0 | 0.607470  | 4.891484  | 3.951419  |
| 71 | 1  | 0 | -0.231925 | 2.912876  | -3.884154 |
| 72 | 1  | 0 | 1.503995  | 2.565037  | -3.755393 |
| 73 | 1  | 0 | 0.458197  | 1.530627  | -4.758123 |

-----  
SCF Done: E(RB+HF-LYP) = -1940.81514661 A.U. after 1 cycles

Convg = 0.4804D-08 -V/T = 2.0091

S\*\*2 = 0.0000

Zero-point correction= 0.607715(a.u.)  
Thermal correction to Energy= 0.660660  
Thermal correction to Enthalpy= 0.661604  
Thermal correction to Gibbs Free Energy= 0.518342  
Sum of electronic and zero-point Energies= -1940.207432  
Sum of electronic and thermal Energies= -1940.154487  
Sum of electronic and thermal Enthalpies= -1940.153543

Sum of electronic and thermal Free Energies= -1940.296805

(8-3) Anionic tetrahedral intermediate, Int1(am),

Ph-C(-O-)(OH)-NH-Et, Na+ and (H2O)16

tuka02bbna.rev.chk Stoichiometry C9H44NNaO18

Standard orientation:

| -----  |        |        |                         |           |           |
|--------|--------|--------|-------------------------|-----------|-----------|
| Center | Atomic | Atomic | Coordinates (Angstroms) |           |           |
| Number | Number | Type   | X                       | Y         | Z         |
| -----  |        |        |                         |           |           |
| 1      | 6      | 0      | -1.791021               | 2.297395  | -0.638961 |
| 2      | 6      | 0      | -1.357299               | 0.823551  | -0.780714 |
| 3      | 8      | 0      | -0.874477               | 0.298467  | 0.382438  |
| 4      | 7      | 0      | -0.342096               | 0.773146  | -1.865077 |
| 5      | 6      | 0      | -0.196663               | -0.503224 | -2.602118 |
| 6      | 6      | 0      | -2.900504               | 2.796507  | -1.334809 |
| 7      | 6      | 0      | -1.041992               | 3.179545  | 0.150352  |
| 8      | 6      | 0      | -1.402817               | 4.522968  | 0.258028  |
| 9      | 1      | 0      | -0.561207               | 1.506253  | -2.538813 |
| 10     | 6      | 0      | 0.816068                | -0.353251 | -3.736218 |
| 11     | 1      | 0      | 0.143684                | -1.266721 | -1.897497 |
| 12     | 1      | 0      | -1.156063               | -0.836871 | -3.014085 |
| 13     | 8      | 0      | -2.499129               | 0.034043  | -1.229856 |
| 14     | 1      | 0      | -3.214471               | 0.113322  | -0.561898 |
| 15     | 1      | 0      | -5.039611               | -3.492255 | 0.795528  |
| 16     | 8      | 0      | -5.007347               | -2.873888 | 0.050888  |
| 17     | 1      | 0      | -4.119822               | -3.004205 | -0.377563 |
| 18     | 1      | 0      | 1.340654                | 0.928848  | -1.162992 |
| 19     | 8      | 0      | 2.978583                | 1.267308  | 1.888880  |
| 20     | 1      | 0      | 2.086444                | 1.375804  | 2.292953  |
| 21     | 1      | 0      | 3.196819                | 0.329869  | 2.075065  |
| 22     | 8      | 0      | 2.923098                | -1.600259 | 2.197529  |
| 23     | 1      | 0      | 3.631136                | -2.090476 | 2.642837  |
| 24     | 1      | 0      | -4.932385               | -1.200359 | 0.461623  |
| 25     | 8      | 0      | -4.705302               | -0.246432 | 0.641379  |
| 26     | 1      | 0      | -5.508941               | 0.269450  | 0.478650  |
| 27     | 1      | 0      | -2.038238               | 0.140211  | 1.685544  |
| 28     | 8      | 0      | -2.598348               | 0.033691  | 2.504191  |
| 29     | 1      | 0      | -3.503320               | -0.059505 | 2.144168  |
| 30     | 1      | 0      | 3.086900                | -1.728202 | 1.208362  |
| 31     | 8      | 0      | 3.287169                | -1.699956 | -0.442474 |
| 32     | 1      | 0      | 4.245976                | -1.566959 | -0.668721 |
| 33     | 1      | 0      | 5.760349                | 3.006359  | 1.601294  |
| 34     | 8      | 0      | 4.988140                | 2.989756  | 1.017279  |
| 35     | 1      | 0      | 4.303466                | 2.450523  | 1.473858  |
| 36     | 1      | 0      | -0.482649               | -1.254429 | 0.473914  |



|    |    |   |           |           |           |
|----|----|---|-----------|-----------|-----------|
| 37 | 8  | 0 | -0.306716 | -2.210368 | 0.773288  |
| 38 | 1  | 0 | -1.126425 | -2.660891 | 0.476324  |
| 39 | 1  | 0 | 6.346104  | -1.244974 | -1.741517 |
| 40 | 8  | 0 | 5.846979  | -0.922710 | -0.976678 |
| 41 | 1  | 0 | 5.634500  | 0.036776  | -1.165689 |
| 42 | 1  | 0 | 2.158057  | -3.176497 | -1.014152 |
| 43 | 8  | 0 | 1.341865  | -3.707223 | -0.908738 |
| 44 | 1  | 0 | 0.822267  | -3.187050 | -0.251181 |
| 45 | 1  | 0 | -2.425022 | -1.836365 | -1.183006 |
| 46 | 8  | 0 | -2.485910 | -2.788997 | -0.930670 |
| 47 | 1  | 0 | -1.980457 | -3.296930 | -1.614516 |
| 48 | 1  | 0 | -0.820632 | -5.032320 | -2.835289 |
| 49 | 8  | 0 | -0.733224 | -4.093222 | -2.617559 |
| 50 | 1  | 0 | 0.118260  | -4.000625 | -2.111419 |
| 51 | 1  | 0 | -0.271812 | 1.162553  | 3.173701  |
| 52 | 8  | 0 | 0.398963  | 0.816532  | 2.563469  |
| 53 | 1  | 0 | -0.056222 | 0.801195  | 1.654877  |
| 54 | 1  | 0 | -1.539654 | -1.721632 | 4.973594  |
| 55 | 8  | 0 | -1.210980 | -1.663613 | 4.066094  |
| 56 | 1  | 0 | -1.860818 | -1.101518 | 3.555133  |
| 57 | 1  | 0 | 5.117166  | 2.168687  | -0.650529 |
| 58 | 8  | 0 | 4.985663  | 1.589048  | -1.434779 |
| 59 | 1  | 0 | 4.014308  | 1.456671  | -1.477653 |
| 60 | 1  | 0 | 2.855685  | -0.843419 | -0.706487 |
| 61 | 8  | 0 | 2.298863  | 0.824921  | -0.878517 |
| 62 | 1  | 0 | 2.372907  | 1.118978  | 0.054409  |
| 63 | 11 | 0 | 0.629578  | -1.568228 | 2.734333  |
| 64 | 6  | 0 | -3.266680 | 4.139995  | -1.222749 |
| 65 | 6  | 0 | -2.520470 | 5.007128  | -0.424531 |
| 66 | 1  | 0 | -3.475866 | 2.126549  | -1.966012 |
| 67 | 1  | 0 | -0.168595 | 2.814991  | 0.680721  |
| 68 | 1  | 0 | -0.808124 | 5.191762  | 0.874750  |
| 69 | 1  | 0 | -4.134173 | 4.507957  | -1.764869 |
| 70 | 1  | 0 | -2.803330 | 6.052923  | -0.338661 |
| 71 | 1  | 0 | 0.488161  | 0.402858  | -4.461645 |
| 72 | 1  | 0 | 1.802152  | -0.058820 | -3.363328 |
| 73 | 1  | 0 | 0.917294  | -1.303504 | -4.270887 |

-----  
SCF Done: E(RB+HF-LYP) = -1940.83625089 A.U. after 1 cycles

Conv = 0.4394D-08 -V/T = 2.0090

S\*\*2 = 0.0000

Zero-point correction= 0.611283 (a.u.)

Thermal correction to Energy= 0.662859

Thermal correction to Enthalpy= 0.663803

Thermal correction to Gibbs Free Energy= 0.525100

Sum of electronic and zero-point Energies= -1940.224968

Sum of electronic and thermal Energies= -1940.173392  
 Sum of electronic and thermal Enthalpies= -1940.172448  
 Sum of electronic and thermal Free Energies= -1940.311151

(8-4) TS2(am) toward the zwitterion(i.e., Mulliken CT complex)

tuka02bbna.chk Stoichiometry C9H44NNaO18

Standard orientation:

| -----  |        |        |                         |           |           |  |
|--------|--------|--------|-------------------------|-----------|-----------|--|
| Center | Atomic | Atomic | Coordinates (Angstroms) |           |           |  |
| Number | Number | Type   | X                       | Y         | Z         |  |
| -----  |        |        |                         |           |           |  |
| 1      | 6      | 0      | -1.551473               | 2.424483  | -0.531199 |  |
| 2      | 6      | 0      | -1.313474               | 0.907550  | -0.654933 |  |
| 3      | 8      | 0      | -0.910598               | 0.312711  | 0.462612  |  |
| 4      | 7      | 0      | -0.208375               | 0.755758  | -1.765704 |  |
| 5      | 6      | 0      | -0.184352               | -0.499500 | -2.587075 |  |
| 6      | 6      | 0      | -2.507446               | 3.073556  | -1.324915 |  |
| 7      | 6      | 0      | -0.769676               | 3.184858  | 0.347811  |  |
| 8      | 6      | 0      | -0.949813               | 4.564911  | 0.443181  |  |
| 9      | 1      | 0      | -0.281057               | 1.557712  | -2.396633 |  |
| 10     | 6      | 0      | 0.887956                | -0.407543 | -3.668581 |  |
| 11     | 1      | 0      | 0.029495                | -1.322909 | -1.905696 |  |
| 12     | 1      | 0      | -1.173143               | -0.642183 | -3.022472 |  |
| 13     | 8      | 0      | -2.452059               | 0.264234  | -1.246000 |  |
| 14     | 1      | 0      | -3.204514               | 0.337994  | -0.611699 |  |
| 15     | 1      | 0      | -5.483005               | -3.154979 | 0.369861  |  |
| 16     | 8      | 0      | -5.263057               | -2.479843 | -0.288813 |  |
| 17     | 1      | 0      | -4.366788               | -2.717394 | -0.645024 |  |
| 18     | 1      | 0      | 0.763353                | 0.812427  | -1.270196 |  |
| 19     | 8      | 0      | 3.059707                | 1.030320  | 2.108027  |  |
| 20     | 1      | 0      | 2.199966                | 1.182437  | 2.549087  |  |
| 21     | 1      | 0      | 3.156742                | 0.049702  | 2.131364  |  |
| 22     | 8      | 0      | 2.817821                | -1.788451 | 2.051135  |  |
| 23     | 1      | 0      | 3.559836                | -2.314165 | 2.386023  |  |
| 24     | 1      | 0      | -5.001909               | -0.875531 | 0.265461  |  |
| 25     | 8      | 0      | -4.672675               | 0.032173  | 0.516745  |  |
| 26     | 1      | 0      | -5.418002               | 0.640248  | 0.398025  |  |
| 27     | 1      | 0      | -2.102390               | 0.115640  | 1.779962  |  |
| 28     | 8      | 0      | -2.673419               | -0.030946 | 2.576732  |  |
| 29     | 1      | 0      | -3.572978               | -0.047326 | 2.196516  |  |
| 30     | 1      | 0      | 2.910733                | -1.807996 | 0.984656  |  |
| 31     | 8      | 0      | 2.943421                | -1.684056 | -0.462276 |  |
| 32     | 1      | 0      | 3.883579                | -1.695034 | -0.749720 |  |
| 33     | 1      | 0      | 5.875683                | 2.493941  | 1.457430  |  |
| 34     | 8      | 0      | 5.036523                | 2.674591  | 1.009653  |  |
| 35     | 1      | 0      | 4.360301                | 2.142547  | 1.488186  |  |

|    |    |   |           |           |           |
|----|----|---|-----------|-----------|-----------|
| 36 | 1  | 0 | -0.661745 | -1.340847 | 0.558695  |
| 37 | 8  | 0 | -0.572793 | -2.294001 | 0.854012  |
| 38 | 1  | 0 | -1.401600 | -2.693217 | 0.521032  |
| 39 | 1  | 0 | 6.086842  | -1.466537 | -1.983401 |
| 40 | 8  | 0 | 5.652046  | -1.148471 | -1.179020 |
| 41 | 1  | 0 | 5.448630  | -0.185417 | -1.340005 |
| 42 | 1  | 0 | 1.908369  | -2.972223 | -0.992803 |
| 43 | 8  | 0 | 1.124574  | -3.590290 | -1.009707 |
| 44 | 1  | 0 | 0.582081  | -3.246652 | -0.268082 |
| 45 | 1  | 0 | -2.527882 | -1.688582 | -1.258360 |
| 46 | 8  | 0 | -2.675545 | -2.639193 | -1.060281 |
| 47 | 1  | 0 | -2.146411 | -3.141818 | -1.734155 |
| 48 | 1  | 0 | -0.940882 | -4.712257 | -3.111974 |
| 49 | 8  | 0 | -0.875820 | -3.811329 | -2.763668 |
| 50 | 1  | 0 | -0.037244 | -3.778045 | -2.214506 |
| 51 | 1  | 0 | -0.297457 | 0.866091  | 3.372290  |
| 52 | 8  | 0 | 0.397187  | 0.599928  | 2.748994  |
| 53 | 1  | 0 | -0.021209 | 0.681243  | 1.845274  |
| 54 | 1  | 0 | -1.575838 | -1.918780 | 4.972407  |
| 55 | 8  | 0 | -1.256000 | -1.840503 | 4.062959  |
| 56 | 1  | 0 | -1.911944 | -1.274587 | 3.575751  |
| 57 | 1  | 0 | 5.008107  | 1.950281  | -0.746299 |
| 58 | 8  | 0 | 4.788791  | 1.408313  | -1.535879 |
| 59 | 1  | 0 | 3.826935  | 1.211116  | -1.414717 |
| 60 | 1  | 0 | 2.563296  | -0.510519 | -0.645636 |
| 61 | 8  | 0 | 2.229269  | 0.632403  | -0.754891 |
| 62 | 1  | 0 | 2.367477  | 0.984589  | 0.145662  |
| 63 | 11 | 0 | 0.630167  | -1.798902 | 2.732814  |
| 64 | 6  | 0 | -2.691321 | 4.454371  | -1.223705 |
| 65 | 6  | 0 | -1.913951 | 5.202972  | -0.339166 |
| 66 | 1  | 0 | -3.109967 | 2.492871  | -2.016642 |
| 67 | 1  | 0 | -0.015211 | 2.698236  | 0.956173  |
| 68 | 1  | 0 | -0.333468 | 5.140458  | 1.128149  |
| 69 | 1  | 0 | -3.441594 | 4.943649  | -1.839098 |
| 70 | 1  | 0 | -2.054609 | 6.277668  | -0.263034 |
| 71 | 1  | 0 | 0.681278  | 0.409679  | -4.371633 |
| 72 | 1  | 0 | 1.880449  | -0.255420 | -3.236513 |
| 73 | 1  | 0 | 0.896789  | -1.343166 | -4.235911 |

-----  
SCF Done: E(RB+HF-LYP) = -1940.81873868 A.U. after 1 cycles

Conv = 0.3382D-08 -V/T = 2.0090

S\*\*2 = 0.0000

Zero-point correction= 0.605882 (a.u.)

Thermal correction to Energy= 0.656922

Thermal correction to Enthalpy= 0.657866

Thermal correction to Gibbs Free Energy= 0.519940

Sum of electronic and zero-point Energies= -1940.212857  
 Sum of electronic and thermal Energies= -1940.161817  
 Sum of electronic and thermal Enthalpies= -1940.160873  
 Sum of electronic and thermal Free Energies= -1940.298799

(8-5) The zwitterion (i.e., Mulliken CT complex), Int2(am),  
 Ph-C(-O-)(OH)-N(H2+)-Et, NaOH and (H2O)15  
 tuka02ccna.for.chk Stoichiometry C9H44NNaO18  
 Standard orientation:

| Center<br>Number | Atomic<br>Number | Atomic<br>Type | Coordinates (Angstroms) |           |           |
|------------------|------------------|----------------|-------------------------|-----------|-----------|
|                  |                  |                | X                       | Y         | Z         |
| 1                | 6                | 0              | 0.172378                | 3.227014  | -0.461961 |
| 2                | 6                | 0              | -0.671871               | 1.982132  | -0.759646 |
| 3                | 8                | 0              | -0.856427               | 1.155739  | 0.254020  |
| 4                | 7                | 0              | 0.226528                | 1.189659  | -1.903986 |
| 5                | 6                | 0              | -0.489572               | 0.182972  | -2.744242 |
| 6                | 6                | 0              | -0.268232               | 4.504579  | -0.824314 |
| 7                | 6                | 0              | 1.409428                | 3.087325  | 0.185285  |
| 8                | 6                | 0              | 2.188609                | 4.208165  | 0.470508  |
| 9                | 1                | 0              | 0.639382                | 1.902951  | -2.510499 |
| 10               | 6                | 0              | 0.402615                | -0.329204 | -3.872008 |
| 11               | 1                | 0              | -0.781340               | -0.635931 | -2.085192 |
| 12               | 1                | 0              | -1.388954               | 0.667878  | -3.127739 |
| 13               | 8                | 0              | -1.841312               | 2.330378  | -1.447723 |
| 14               | 1                | 0              | -2.606889               | 1.915643  | -0.993056 |
| 15               | 1                | 0              | -6.367238               | -0.793157 | 0.678381  |
| 16               | 8                | 0              | -5.907482               | -0.600627 | -0.152117 |
| 17               | 1                | 0              | -5.330145               | -1.379769 | -0.338729 |
| 18               | 1                | 0              | 1.013468                | 0.702137  | -1.411534 |
| 19               | 8                | 0              | 2.820948                | -0.506062 | 1.897592  |
| 20               | 1                | 0              | 2.217680                | 0.107034  | 2.360062  |
| 21               | 1                | 0              | 2.361495                | -1.432806 | 2.017639  |
| 22               | 8                | 0              | 1.450981                | -2.673889 | 2.036052  |
| 23               | 1                | 0              | 1.840303                | -3.372411 | 2.581357  |
| 24               | 1                | 0              | -4.953358               | 0.854356  | -0.209689 |
| 25               | 8                | 0              | -4.374046               | 1.661298  | -0.178090 |
| 26               | 1                | 0              | -4.929340               | 2.401835  | -0.466456 |
| 27               | 1                | 0              | -2.108523               | 1.434263  | 1.533559  |
| 28               | 8                | 0              | -2.830405               | 1.418081  | 2.206997  |
| 29               | 1                | 0              | -3.619714               | 1.580721  | 1.654395  |
| 30               | 1                | 0              | 1.742508                | -3.055862 | 0.476528  |
| 31               | 8                | 0              | 1.873639                | -3.109183 | -0.533149 |
| 32               | 1                | 0              | 2.777301                | -3.469862 | -0.698085 |
| 33               | 1                | 0              | 6.018880                | -0.868368 | 2.073861  |

|    |    |   |           |           |           |
|----|----|---|-----------|-----------|-----------|
| 34 | 8  | 0 | 5.520398  | -0.245923 | 1.524661  |
| 35 | 1  | 0 | 4.572878  | -0.337523 | 1.799309  |
| 36 | 1  | 0 | -1.426388 | -0.440571 | 0.170506  |
| 37 | 8  | 0 | -1.607502 | -1.405785 | 0.339109  |
| 38 | 1  | 0 | -2.534108 | -1.583991 | 0.076268  |
| 39 | 1  | 0 | 4.862587  | -4.122520 | -1.830384 |
| 40 | 8  | 0 | 4.554694  | -3.675943 | -1.028571 |
| 41 | 1  | 0 | 4.860229  | -2.729848 | -1.101195 |
| 42 | 1  | 0 | 0.291141  | -3.525493 | -1.244832 |
| 43 | 8  | 0 | -0.670682 | -3.377061 | -1.423584 |
| 44 | 1  | 0 | -0.893891 | -2.646780 | -0.804286 |
| 45 | 1  | 0 | -3.891541 | -2.223011 | -1.846927 |
| 46 | 8  | 0 | -3.997877 | -2.411440 | -0.900858 |
| 47 | 1  | 0 | -3.723252 | -3.370554 | -0.816814 |
| 48 | 1  | 0 | -2.784193 | -5.474718 | -0.263751 |
| 49 | 8  | 0 | -2.860201 | -4.829661 | -0.981552 |
| 50 | 1  | 0 | -1.940250 | -4.473656 | -1.152512 |
| 51 | 1  | 0 | -0.047622 | 1.219579  | 3.255021  |
| 52 | 8  | 0 | 0.349103  | 0.638616  | 2.588401  |
| 53 | 1  | 0 | 0.030180  | 0.981569  | 1.708428  |
| 54 | 1  | 0 | -2.668841 | -0.903165 | 4.415783  |
| 55 | 8  | 0 | -2.417794 | -0.979521 | 3.484323  |
| 56 | 1  | 0 | -2.677081 | -0.120057 | 3.056423  |
| 57 | 1  | 0 | 5.412331  | -0.722949 | -0.264372 |
| 58 | 8  | 0 | 5.105935  | -1.012488 | -1.155744 |
| 59 | 1  | 0 | 4.186229  | -0.674962 | -1.209208 |
| 60 | 1  | 0 | 2.073056  | -1.383406 | -0.852364 |
| 61 | 8  | 0 | 2.294767  | -0.412054 | -0.801266 |
| 62 | 1  | 0 | 2.486218  | -0.308637 | 0.169405  |
| 63 | 11 | 0 | -0.469578 | -1.632506 | 2.371546  |
| 64 | 6  | 0 | 0.511261  | 5.626385  | -0.531572 |
| 65 | 6  | 0 | 1.739172  | 5.481996  | 0.114349  |
| 66 | 1  | 0 | -1.223713 | 4.612156  | -1.324802 |
| 67 | 1  | 0 | 1.766982  | 2.102905  | 0.471714  |
| 68 | 1  | 0 | 3.145066  | 4.083543  | 0.970264  |
| 69 | 1  | 0 | 0.155335  | 6.614670  | -0.810401 |
| 70 | 1  | 0 | 2.344993  | 6.355759  | 0.338420  |
| 71 | 1  | 0 | 0.685238  | 0.477597  | -4.559969 |
| 72 | 1  | 0 | 1.314669  | -0.791623 | -3.483048 |
| 73 | 1  | 0 | -0.138720 | -1.086983 | -4.446996 |

-----  
SCF Done: E(RB+HF-LYP) = -1940.82661398 A.U. after 1 cycles

Conv = 0.2289D-08 -V/T = 2.0091

S\*\*2 = 0.0000

Zero-point correction= 0.610399 (a.u.)

Thermal correction to Energy= 0.662633

Thermal correction to Enthalpy= 0.663577  
 Thermal correction to Gibbs Free Energy= 0.521463  
 Sum of electronic and zero-point Energies= -1940.216215  
 Sum of electronic and thermal Energies= -1940.163981  
 Sum of electronic and thermal Enthalpies= -1940.163037  
 Sum of electronic and thermal Free Energies= -1940.305151

(8-6) TS3(am), C(2)----N(7) scission TS  
 tuka02ccna.chk Stoichiometry C9H44NNaO18  
 Standard orientation:

| -----  |        |        |                         |           |           |  |
|--------|--------|--------|-------------------------|-----------|-----------|--|
| Center | Atomic | Atomic | Coordinates (Angstroms) |           |           |  |
| Number | Number | Type   | X                       | Y         | Z         |  |
| -----  |        |        |                         |           |           |  |
| 1      | 6      | 0      | 0.341215                | 3.340841  | -0.237571 |  |
| 2      | 6      | 0      | -0.688319               | 2.253572  | -0.426717 |  |
| 3      | 8      | 0      | -0.834394               | 1.348779  | 0.474597  |  |
| 4      | 7      | 0      | 0.213532                | 1.326514  | -1.902647 |  |
| 5      | 6      | 0      | -0.675002               | 0.578657  | -2.812584 |  |
| 6      | 6      | 0      | 0.095049                | 4.651156  | -0.666318 |  |
| 7      | 6      | 0      | 1.563342                | 3.035026  | 0.378351  |  |
| 8      | 6      | 0      | 2.523606                | 4.027441  | 0.567184  |  |
| 9      | 1      | 0      | 0.727669                | 2.041673  | -2.418898 |  |
| 10     | 6      | 0      | 0.063411                | -0.052753 | -3.994641 |  |
| 11     | 1      | 0      | -1.163135               | -0.198727 | -2.217423 |  |
| 12     | 1      | 0      | -1.447475               | 1.272454  | -3.159770 |  |
| 13     | 8      | 0      | -1.812830               | 2.697591  | -1.060183 |  |
| 14     | 1      | 0      | -2.591914               | 2.177503  | -0.754611 |  |
| 15     | 1      | 0      | -6.612371               | -0.582273 | 0.091119  |  |
| 16     | 8      | 0      | -5.918137               | -0.329761 | -0.535132 |  |
| 17     | 1      | 0      | -5.329513               | -1.117564 | -0.638997 |  |
| 18     | 1      | 0      | 0.911386                | 0.692996  | -1.471032 |  |
| 19     | 8      | 0      | 2.787862                | -0.784736 | 1.873488  |  |
| 20     | 1      | 0      | 2.235732                | -0.175358 | 2.397406  |  |
| 21     | 1      | 0      | 2.301984                | -1.700737 | 1.965780  |  |
| 22     | 8      | 0      | 1.355166                | -2.913995 | 1.954594  |  |
| 23     | 1      | 0      | 1.716799                | -3.634609 | 2.489832  |  |
| 24     | 1      | 0      | -4.946897               | 1.063625  | -0.228862 |  |
| 25     | 8      | 0      | -4.338876               | 1.828047  | -0.038256 |  |
| 26     | 1      | 0      | -4.855911               | 2.630664  | -0.207986 |  |
| 27     | 1      | 0      | -2.163119               | 1.397518  | 1.777133  |  |
| 28     | 8      | 0      | -2.928581               | 1.275172  | 2.380968  |  |
| 29     | 1      | 0      | -3.680957               | 1.477219  | 1.789942  |  |
| 30     | 1      | 0      | 1.640567                | -3.278158 | 0.375265  |  |
| 31     | 8      | 0      | 1.752497                | -3.308148 | -0.634308 |  |
| 32     | 1      | 0      | 2.655137                | -3.654462 | -0.831672 |  |

|    |    |   |           |           |           |
|----|----|---|-----------|-----------|-----------|
| 33 | 1  | 0 | 5.972845  | -1.249573 | 1.871487  |
| 34 | 8  | 0 | 5.477768  | -0.563032 | 1.401096  |
| 35 | 1  | 0 | 4.537747  | -0.653255 | 1.700427  |
| 36 | 1  | 0 | -1.386021 | -0.297705 | 0.183041  |
| 37 | 8  | 0 | -1.563635 | -1.268074 | 0.246991  |
| 38 | 1  | 0 | -2.496379 | -1.415059 | -0.016428 |
| 39 | 1  | 0 | 4.684218  | -4.257200 | -2.063305 |
| 40 | 8  | 0 | 4.420661  | -3.837946 | -1.231450 |
| 41 | 1  | 0 | 4.714502  | -2.886862 | -1.294162 |
| 42 | 1  | 0 | 0.161091  | -3.556124 | -1.365646 |
| 43 | 8  | 0 | -0.786848 | -3.326532 | -1.537396 |
| 44 | 1  | 0 | -0.920618 | -2.540301 | -0.966175 |
| 45 | 1  | 0 | -3.774775 | -2.054748 | -1.949700 |
| 46 | 8  | 0 | -3.970777 | -2.175939 | -1.006448 |
| 47 | 1  | 0 | -3.770317 | -3.144901 | -0.847117 |
| 48 | 1  | 0 | -2.918803 | -5.226470 | -0.115371 |
| 49 | 8  | 0 | -3.000182 | -4.655883 | -0.893165 |
| 50 | 1  | 0 | -2.076017 | -4.346021 | -1.126488 |
| 51 | 1  | 0 | 0.021608  | 0.944551  | 3.474618  |
| 52 | 8  | 0 | 0.367966  | 0.440788  | 2.722626  |
| 53 | 1  | 0 | 0.068812  | 0.924331  | 1.910426  |
| 54 | 1  | 0 | -2.785846 | -1.299391 | 4.308511  |
| 55 | 8  | 0 | -2.471981 | -1.239895 | 3.395125  |
| 56 | 1  | 0 | -2.752146 | -0.347103 | 3.061738  |
| 57 | 1  | 0 | 5.295443  | -0.922445 | -0.416471 |
| 58 | 8  | 0 | 4.957785  | -1.170857 | -1.308402 |
| 59 | 1  | 0 | 4.034720  | -0.833913 | -1.312746 |
| 60 | 1  | 0 | 1.950829  | -1.545085 | -0.914562 |
| 61 | 8  | 0 | 2.182980  | -0.582171 | -0.832282 |
| 62 | 1  | 0 | 2.391653  | -0.511262 | 0.133818  |
| 63 | 11 | 0 | -0.505799 | -1.784496 | 2.275435  |
| 64 | 6  | 0 | 1.057340  | 5.643636  | -0.470236 |
| 65 | 6  | 0 | 2.271211  | 5.335278  | 0.145140  |
| 66 | 1  | 0 | -0.850910 | 4.887995  | -1.140103 |
| 67 | 1  | 0 | 1.767719  | 2.019103  | 0.700970  |
| 68 | 1  | 0 | 3.468653  | 3.776716  | 1.040271  |
| 69 | 1  | 0 | 0.855425  | 6.659590  | -0.798668 |
| 70 | 1  | 0 | 3.019820  | 6.108726  | 0.293233  |
| 71 | 1  | 0 | 0.557332  | 0.711276  | -4.607535 |
| 72 | 1  | 0 | 0.820886  | -0.764727 | -3.652830 |
| 73 | 1  | 0 | -0.643057 | -0.592438 | -4.635091 |

-----  
SCF Done: E(RB+HF-LYP) = -1940.82510814 A.U. after 1 cycles

Conv = 0.1902D-08 -V/T = 2.0091

S\*\*2 = 0.0000

Zero-point correction= 0.608575 (a.u.)

Thermal correction to Energy= 0.661088  
 Thermal correction to Enthalpy= 0.662033  
 Thermal correction to Gibbs Free Energy= 0.518382  
 Sum of electronic and zero-point Energies= -1940.216533  
 Sum of electronic and thermal Energies= -1940.164020  
 Sum of electronic and thermal Enthalpies= -1940.163076  
 Sum of electronic and thermal Free Energies= -1940.306726

(8-7) Ph-COOH, Et-NH2 and NaOH(H2O)15, Int3(am)  
 tuka02ccna.rev.chk Stoichiometry C9H44NNaO18

Standard orientation:

| -----  |        |        |                         |           |           |  |
|--------|--------|--------|-------------------------|-----------|-----------|--|
| Center | Atomic | Atomic | Coordinates (Angstroms) |           |           |  |
| Number | Number | Type   | X                       | Y         | Z         |  |
| -----  |        |        |                         |           |           |  |
| 1      | 6      | 0      | 2.826328                | 2.482038  | -0.369214 |  |
| 2      | 6      | 0      | 3.336563                | 1.174327  | -0.848041 |  |
| 3      | 8      | 0      | 2.913825                | 0.618036  | -1.872172 |  |
| 4      | 7      | 0      | -0.568908               | 1.573708  | 1.698476  |  |
| 5      | 6      | 0      | -0.821301               | 1.686200  | 3.150100  |  |
| 6      | 6      | 0      | 3.254453                | 3.020308  | 0.854745  |  |
| 7      | 6      | 0      | 1.889640                | 3.179165  | -1.147857 |  |
| 8      | 6      | 0      | 1.381860                | 4.398028  | -0.704570 |  |
| 9      | 1      | 0      | -0.064728               | 2.395455  | 1.364235  |  |
| 10     | 6      | 0      | -1.620924               | 2.924516  | 3.561571  |  |
| 11     | 1      | 0      | -1.352463               | 0.777553  | 3.454216  |  |
| 12     | 1      | 0      | 0.148662                | 1.673892  | 3.663873  |  |
| 13     | 8      | 0      | 4.286898                | 0.648805  | -0.088564 |  |
| 14     | 1      | 0      | 4.553914                | -0.273882 | -0.379679 |  |
| 15     | 1      | 0      | 2.584163                | -3.556360 | -0.136786 |  |
| 16     | 8      | 0      | 3.310273                | -3.504204 | 0.522702  |  |
| 17     | 1      | 0      | 2.894071                | -3.177909 | 1.355208  |  |
| 18     | 1      | 0      | -1.467918               | 1.545185  | 1.195649  |  |
| 19     | 8      | 0      | -2.589387               | 0.345022  | -2.393845 |  |
| 20     | 1      | 0      | -1.687962               | 0.566376  | -2.683566 |  |
| 21     | 1      | 0      | -2.552685               | -0.671875 | -2.158665 |  |
| 22     | 8      | 0      | -2.338387               | -2.073810 | -1.606828 |  |
| 23     | 1      | 0      | -2.756896               | -2.743253 | -2.165639 |  |
| 24     | 1      | 0      | 4.440323                | -2.512416 | -0.108547 |  |
| 25     | 8      | 0      | 5.049814                | -1.889061 | -0.622994 |  |
| 26     | 1      | 0      | 5.960286                | -2.109529 | -0.372945 |  |
| 27     | 1      | 0      | 3.270286                | -1.036855 | -2.686504 |  |
| 28     | 8      | 0      | 3.418013                | -1.977961 | -2.920289 |  |
| 29     | 1      | 0      | 4.215159                | -2.193790 | -2.395965 |  |
| 30     | 1      | 0      | -3.264037               | -1.913585 | -0.241429 |  |
| 31     | 8      | 0      | -3.694815               | -1.646133 | 0.635079  |  |



|    |    |   |           |           |           |
|----|----|---|-----------|-----------|-----------|
| 32 | 1  | 0 | -4.672149 | -1.641651 | 0.498499  |
| 33 | 1  | 0 | -5.457405 | 0.748478  | -3.778029 |
| 34 | 8  | 0 | -4.998507 | 1.394572  | -3.221606 |
| 35 | 1  | 0 | -4.104393 | 1.010154  | -3.043475 |
| 36 | 1  | 0 | 0.106882  | 0.080105  | 1.253595  |
| 37 | 8  | 0 | 0.334309  | -0.874754 | 0.969509  |
| 38 | 1  | 0 | 1.012746  | -1.219161 | 1.586406  |
| 39 | 1  | 0 | -7.063391 | -1.217566 | 0.796981  |
| 40 | 8  | 0 | -6.390808 | -1.184193 | 0.101413  |
| 41 | 1  | 0 | -6.297770 | -0.221577 | -0.145444 |
| 42 | 1  | 0 | -2.607442 | -2.070444 | 1.977590  |
| 43 | 8  | 0 | -1.773482 | -2.071578 | 2.510667  |
| 44 | 1  | 0 | -1.122804 | -1.613646 | 1.936289  |
| 45 | 1  | 0 | 2.476048  | -2.130222 | 3.495460  |
| 46 | 8  | 0 | 1.983669  | -2.447574 | 2.723461  |
| 47 | 1  | 0 | 1.245372  | -3.025739 | 3.083973  |
| 48 | 1  | 0 | -0.273896 | -4.734804 | 3.345353  |
| 49 | 8  | 0 | -0.121189 | -3.819907 | 3.622674  |
| 50 | 1  | 0 | -0.878701 | -3.277096 | 3.253780  |
| 51 | 1  | 0 | 0.462028  | -0.410160 | -3.621708 |
| 52 | 8  | 0 | 0.348220  | -0.082734 | -2.715981 |
| 53 | 1  | 0 | 1.205746  | 0.329549  | -2.471729 |
| 54 | 1  | 0 | 1.182333  | -4.103277 | -2.081065 |
| 55 | 8  | 0 | 1.453818  | -3.291236 | -1.625903 |
| 56 | 1  | 0 | 2.145582  | -2.857015 | -2.204976 |
| 57 | 1  | 0 | -5.715070 | 1.486136  | -1.488885 |
| 58 | 8  | 0 | -5.871942 | 1.412354  | -0.519797 |
| 59 | 1  | 0 | -4.970543 | 1.480450  | -0.130919 |
| 60 | 1  | 0 | -3.337763 | 0.128983  | 0.536035  |
| 61 | 8  | 0 | -3.148776 | 1.061604  | 0.257050  |
| 62 | 1  | 0 | -2.892415 | 0.950794  | -0.690105 |
| 63 | 11 | 0 | -0.250299 | -1.731991 | -1.066629 |
| 64 | 6  | 0 | 2.743856  | 4.240296  | 1.293916  |
| 65 | 6  | 0 | 1.807294  | 4.928648  | 0.517084  |
| 66 | 1  | 0 | 3.978090  | 2.478393  | 1.452784  |
| 67 | 1  | 0 | 1.568113  | 2.764743  | -2.097224 |
| 68 | 1  | 0 | 0.656757  | 4.933656  | -1.309808 |
| 69 | 1  | 0 | 3.076386  | 4.655160  | 2.240948  |
| 70 | 1  | 0 | 1.410671  | 5.879667  | 0.861585  |
| 71 | 1  | 0 | -1.091903 | 3.846489  | 3.287487  |
| 72 | 1  | 0 | -2.598927 | 2.936021  | 3.067893  |
| 73 | 1  | 0 | -1.785690 | 2.941381  | 4.645814  |

-----  
SCF Done: E(RB+HF-LYP) = -1940.86175587 A.U. after 1 cycles

Conv = 0.3267D-08 -V/T = 2.0091

S\*\*2 = 0.0000

Zero-point correction= 0.609265 (a.u.)  
 Thermal correction to Energy= 0.662209  
 Thermal correction to Enthalpy= 0.663154  
 Thermal correction to Gibbs Free Energy= 0.516907  
 Sum of electronic and zero-point Energies= -1940.252491  
 Sum of electronic and thermal Energies= -1940.199546  
 Sum of electronic and thermal Enthalpies= -1940.198602  
 Sum of electronic and thermal Free Energies= -1940.344849

(8-8) TS4(am) leading to the product  
 tuka02d1na.chk Stoichiometry C9H44NNaO18  
 standard orientation:

| Center<br>Number | Atomic<br>Number | Atomic<br>Type | Coordinates (Angstroms) |           |           |
|------------------|------------------|----------------|-------------------------|-----------|-----------|
|                  |                  |                | X                       | Y         | Z         |
| 1                | 6                | 0              | -3.860491               | 1.431750  | -0.164245 |
| 2                | 6                | 0              | -3.029012               | 0.591816  | -1.086420 |
| 3                | 8                | 0              | -3.618275               | -0.102505 | -1.970087 |
| 4                | 7                | 0              | 0.488601                | -1.994185 | 1.951954  |
| 5                | 6                | 0              | 1.085603                | -2.770489 | 3.054300  |
| 6                | 6                | 0              | -5.140265               | 1.851105  | -0.553490 |
| 7                | 6                | 0              | -5.905779               | 2.646213  | 0.298036  |
| 8                | 6                | 0              | -5.403400               | 3.013954  | 1.549022  |
| 9                | 1                | 0              | 1.016195                | -2.238240 | 4.016295  |
| 10               | 1                | 0              | 2.154952                | -2.893270 | 2.838703  |
| 11               | 6                | 0              | 0.423456                | -4.140462 | 3.184241  |
| 12               | 8                | 0              | -1.763980               | 0.623440  | -0.930314 |
| 13               | 1                | 0              | 0.939378                | 1.690490  | -1.394268 |
| 14               | 1                | 0              | -0.971497               | -0.327957 | -1.698092 |
| 15               | 8                | 0              | -0.313844               | -0.950633 | -2.249761 |
| 16               | 1                | 0              | -0.856245               | -1.196169 | -3.054691 |
| 17               | 8                | 0              | -2.508375               | -1.483868 | 2.504951  |
| 18               | 1                | 0              | -3.103060               | -2.071697 | 1.978168  |
| 19               | 1                | 0              | -2.970295               | -1.341844 | 3.343750  |
| 20               | 8                | 0              | 0.586076                | 2.177442  | -0.586725 |
| 21               | 1                | 0              | 1.389765                | 1.264163  | 0.800637  |
| 22               | 1                | 0              | -0.362256               | 1.925555  | -0.550525 |
| 23               | 8                | 0              | 1.503318                | 0.619762  | -2.546073 |
| 24               | 1                | 0              | 0.581205                | -0.241184 | -2.507945 |
| 25               | 1                | 0              | 1.647983                | 0.950968  | -3.444386 |
| 26               | 1                | 0              | 0.436637                | -2.445168 | -1.158654 |
| 27               | 8                | 0              | 0.831471                | -3.089504 | -0.539272 |
| 28               | 1                | 0              | 0.665558                | -2.710322 | 0.391477  |
| 29               | 8                | 0              | 1.978088                | 0.666988  | 1.320205  |
| 30               | 1                | 0              | 0.962862                | -1.090744 | 1.867214  |

|    |    |   |           |           |           |
|----|----|---|-----------|-----------|-----------|
| 31 | 1  | 0 | 2.479509  | 1.238343  | 1.947583  |
| 32 | 1  | 0 | -2.849481 | -0.852959 | -3.333691 |
| 33 | 8  | 0 | -2.254590 | -1.265015 | -4.019875 |
| 34 | 1  | 0 | -2.637192 | -2.130410 | -4.227290 |
| 35 | 8  | 0 | 3.524987  | 2.360446  | 2.916114  |
| 36 | 1  | 0 | 3.062030  | 2.931319  | 3.546754  |
| 37 | 1  | 0 | 3.928800  | 2.958229  | 2.244851  |
| 38 | 8  | 0 | 4.462658  | 3.849413  | 0.756689  |
| 39 | 1  | 0 | 3.607051  | 4.093891  | 0.303840  |
| 40 | 1  | 0 | 4.952110  | 4.677271  | 0.875814  |
| 41 | 1  | 0 | -4.754232 | -1.344454 | -1.495584 |
| 42 | 8  | 0 | -5.311936 | -2.101224 | -1.183973 |
| 43 | 1  | 0 | -6.201633 | -1.740871 | -1.057356 |
| 44 | 1  | 0 | -4.605921 | -2.815337 | 0.273750  |
| 45 | 8  | 0 | -4.180047 | -3.208742 | 1.076010  |
| 46 | 1  | 0 | -3.715539 | -3.999139 | 0.763039  |
| 47 | 1  | 0 | 2.742720  | 0.189284  | -1.624507 |
| 48 | 8  | 0 | 3.430271  | 0.003697  | -0.908822 |
| 49 | 1  | 0 | 2.957872  | 0.192409  | -0.054693 |
| 50 | 1  | 0 | 1.427836  | 3.685178  | -0.404805 |
| 51 | 8  | 0 | 2.044012  | 4.461704  | -0.319635 |
| 52 | 1  | 0 | 1.995398  | 4.925377  | -1.168660 |
| 53 | 11 | 0 | 4.655898  | -1.844704 | -0.812225 |
| 54 | 8  | 0 | 6.604719  | -0.770917 | -0.470758 |
| 55 | 1  | 0 | 7.558673  | -0.878232 | -0.355369 |
| 56 | 1  | 0 | 6.422594  | 0.209837  | -0.526289 |
| 57 | 8  | 0 | 3.371374  | -3.632474 | -0.932766 |
| 58 | 1  | 0 | 2.384571  | -3.428887 | -0.800745 |
| 59 | 1  | 0 | 3.429338  | -4.589631 | -1.058174 |
| 60 | 8  | 0 | 5.586438  | 1.685418  | -0.856063 |
| 61 | 1  | 0 | 4.717042  | 1.224927  | -0.964455 |
| 62 | 1  | 0 | 5.397012  | 2.426810  | -0.246620 |
| 63 | 6  | 0 | -3.361391 | 1.800481  | 1.092054  |
| 64 | 6  | 0 | -4.134998 | 2.584229  | 1.947000  |
| 65 | 1  | 0 | -5.515522 | 1.563318  | -1.531067 |
| 66 | 1  | 0 | -6.891752 | 2.981313  | -0.013652 |
| 67 | 1  | 0 | -6.001033 | 3.631689  | 2.214597  |
| 68 | 1  | 0 | -2.385264 | 1.436990  | 1.395829  |
| 69 | 1  | 0 | -3.749632 | 2.858711  | 2.925320  |
| 70 | 1  | 0 | -0.644970 | -4.033873 | 3.407160  |
| 71 | 1  | 0 | 0.517267  | -4.707230 | 2.251732  |
| 72 | 1  | 0 | 0.881950  | -4.721408 | 3.993559  |
| 73 | 1  | 0 | -0.497130 | -1.805011 | 2.160492  |

-----  
SCF Done: E(RB3LYP) = -1940.84877758 A.U. after 13 cycles  
Conv = 0.3257D-08 -V/T = 2.0090

Zero-point correction= 0.600769 (a.u.)  
 Thermal correction to Energy= 0.655273  
 Thermal correction to Enthalpy= 0.656217  
 Thermal correction to Gibbs Free Energy= 0.501791  
 Sum of electronic and zero-point Energies= -1940.248009  
 Sum of electronic and thermal Energies= -1940.193504  
 Sum of electronic and thermal Enthalpies= -1940.192560  
 Sum of electronic and thermal Free Energies= -1940.346986

(8-9) Product, Ph-COONa + Et-NH2 + (H2O)16  
 tuka02d1na.for.chk Stoichiometry C9H44NNaO18  
 Standard orientation:

| Center<br>Number | Atomic<br>Number | Atomic<br>Type | Coordinates (Angstroms) |           |           |
|------------------|------------------|----------------|-------------------------|-----------|-----------|
|                  |                  |                | X                       | Y         | Z         |
| 1                | 6                | 0              | -3.777219               | 1.546187  | 0.016509  |
| 2                | 6                | 0              | -3.033283               | 0.803052  | -1.064867 |
| 3                | 8                | 0              | -3.706599               | 0.077296  | -1.855905 |
| 4                | 7                | 0              | 0.319939                | -1.423436 | 2.070731  |
| 5                | 6                | 0              | 0.972902                | -2.010179 | 3.256207  |
| 6                | 6                | 0              | -5.171959               | 1.672506  | -0.048555 |
| 7                | 6                | 0              | -5.865958               | 2.346251  | 0.955239  |
| 8                | 6                | 0              | -5.175151               | 2.887256  | 2.042635  |
| 9                | 1                | 0              | 0.953480                | -1.320388 | 4.114519  |
| 10               | 1                | 0              | 2.030078                | -2.179195 | 3.010658  |
| 11               | 6                | 0              | 0.313839                | -3.330177 | 3.651094  |
| 12               | 8                | 0              | -1.766550               | 0.927134  | -1.113166 |
| 13               | 1                | 0              | 0.891791                | 1.767196  | -1.919826 |
| 14               | 1                | 0              | -0.966141               | -0.398911 | -1.804425 |
| 15               | 8                | 0              | -0.446723               | -1.125641 | -2.260586 |
| 16               | 1                | 0              | -1.105339               | -1.480475 | -2.916379 |
| 17               | 8                | 0              | -2.664059               | -1.358445 | 2.444086  |
| 18               | 1                | 0              | -2.750497               | -2.092507 | 1.784443  |
| 19               | 1                | 0              | -3.178626               | -0.617329 | 2.090336  |
| 20               | 8                | 0              | 0.567353                | 2.293513  | -1.153266 |
| 21               | 1                | 0              | 1.377778                | 1.494793  | 0.286168  |
| 22               | 1                | 0              | -0.382048               | 2.021500  | -1.055862 |
| 23               | 8                | 0              | 1.494893                | 0.429711  | -3.074469 |
| 24               | 1                | 0              | 0.752220                | -0.237124 | -2.908896 |
| 25               | 1                | 0              | 1.566710                | 0.553896  | -4.032768 |
| 26               | 1                | 0              | -0.023940               | -2.323033 | -0.922338 |
| 27               | 8                | 0              | 0.159919                | -2.941456 | -0.175330 |
| 28               | 1                | 0              | 0.233191                | -2.362179 | 0.669072  |
| 29               | 8                | 0              | 1.949852                | 0.922329  | 0.849543  |
| 30               | 1                | 0              | 0.776643                | -0.546719 | 1.808243  |

|    |    |   |           |           |           |
|----|----|---|-----------|-----------|-----------|
| 31 | 1  | 0 | 2.465227  | 1.517848  | 1.445185  |
| 32 | 1  | 0 | -3.023530 | -0.857199 | -3.306890 |
| 33 | 8  | 0 | -2.623424 | -1.608481 | -3.809009 |
| 34 | 1  | 0 | -3.131847 | -2.372274 | -3.483082 |
| 35 | 8  | 0 | 3.527759  | 2.603698  | 2.394495  |
| 36 | 1  | 0 | 3.087123  | 3.260909  | 2.953018  |
| 37 | 1  | 0 | 4.022886  | 3.105645  | 1.707352  |
| 38 | 8  | 0 | 4.676723  | 3.714374  | 0.121062  |
| 39 | 1  | 0 | 3.847364  | 3.988587  | -0.354537 |
| 40 | 1  | 0 | 5.269532  | 4.480692  | 0.100004  |
| 41 | 1  | 0 | -4.261787 | -1.577386 | -1.548182 |
| 42 | 8  | 0 | -4.334724 | -2.563820 | -1.578223 |
| 43 | 1  | 0 | -5.265043 | -2.779000 | -1.415501 |
| 44 | 1  | 0 | -3.182407 | -3.192787 | -0.229994 |
| 45 | 8  | 0 | -2.619295 | -3.390722 | 0.548263  |
| 46 | 1  | 0 | -1.690900 | -3.386118 | 0.229621  |
| 47 | 1  | 0 | 2.796394  | -0.072286 | -1.946586 |
| 48 | 8  | 0 | 3.354352  | -0.228309 | -1.148910 |
| 49 | 1  | 0 | 2.855899  | 0.204166  | -0.397864 |
| 50 | 1  | 0 | 1.559838  | 3.738914  | -1.011263 |
| 51 | 8  | 0 | 2.258768  | 4.437690  | -0.936862 |
| 52 | 1  | 0 | 2.101868  | 5.055307  | -1.665759 |
| 53 | 11 | 0 | 4.062780  | -2.185965 | -0.307848 |
| 54 | 8  | 0 | 5.986802  | -1.279728 | 0.423242  |
| 55 | 1  | 0 | 6.778262  | -1.472058 | 0.944670  |
| 56 | 1  | 0 | 6.060674  | -0.333885 | 0.117054  |
| 57 | 8  | 0 | 2.628172  | -3.864122 | -0.377350 |
| 58 | 1  | 0 | 1.658061  | -3.574699 | -0.336042 |
| 59 | 1  | 0 | 2.622624  | -4.831343 | -0.360966 |
| 60 | 8  | 0 | 5.737701  | 1.125525  | -0.785589 |
| 61 | 1  | 0 | 4.877754  | 0.778684  | -1.118223 |
| 62 | 1  | 0 | 5.522854  | 2.007808  | -0.421872 |
| 63 | 6  | 0 | -3.089455 | 2.097960  | 1.107143  |
| 64 | 6  | 0 | -3.786266 | 2.759089  | 2.119062  |
| 65 | 1  | 0 | -5.694618 | 1.242277  | -0.896428 |
| 66 | 1  | 0 | -6.946315 | 2.446729  | 0.892793  |
| 67 | 1  | 0 | -5.717784 | 3.404897  | 2.829337  |
| 68 | 1  | 0 | -2.010601 | 1.991961  | 1.156384  |
| 69 | 1  | 0 | -3.246448 | 3.173117  | 2.966434  |
| 70 | 1  | 0 | -0.744985 | -3.178819 | 3.888439  |
| 71 | 1  | 0 | 0.373719  | -4.058515 | 2.834453  |
| 72 | 1  | 0 | 0.803505  | -3.758738 | 4.533336  |
| 73 | 1  | 0 | -0.664818 | -1.218325 | 2.280361  |

-----  
SCF Done: E(RB+HF-LYP) = -1940.86925259 A.U. after 1 cycles  
Conv = 0.2598D-08 -V/T = 2.0090

$$S^{**2} = 0.0000$$

|                                              |                 |
|----------------------------------------------|-----------------|
| Zero-point correction=                       | 0.608875 (a.u.) |
| Thermal correction to Energy=                | 0.663116        |
| Thermal correction to Enthalpy=              | 0.664060        |
| Thermal correction to Gibbs Free Energy=     | 0.513287        |
| Sum of electronic and zero-point Energies=   | -1940.260378    |
| Sum of electronic and thermal Energies=      | -1940.206137    |
| Sum of electronic and thermal Enthalpies=    | -1940.205192    |
| Sum of electronic and thermal Free Energies= | -1940.355966    |

---

[9] B3LYP/6-311+G(d,p) geometries of the reactant-like complex (precursor), TS1(am) and T2(am)

(9-1) precursor composed of Ph-C(=O)-NH-Et + HO-(H<sub>2</sub>O)<sub>16</sub>

Stoichiometry C<sub>9</sub>H<sub>44</sub>NO<sub>18</sub>(1-)

tuka02aaA.for.log Standard orientation:

| Center<br>Number | Atomic<br>Number | Atomic<br>Type | Coordinates (Angstroms) |           |           |
|------------------|------------------|----------------|-------------------------|-----------|-----------|
|                  |                  |                | X                       | Y         | Z         |
| 1                | 6                | 0              | -0.499203               | 2.783375  | -0.571371 |
| 2                | 6                | 0              | -0.563601               | 1.822573  | 0.581891  |
| 3                | 8                | 0              | -1.436696               | 0.923726  | 0.591115  |
| 4                | 7                | 0              | 0.288228                | 2.006528  | 1.596346  |
| 5                | 6                | 0              | 0.347439                | 1.114923  | 2.757416  |
| 6                | 6                | 0              | -1.659104               | 2.960325  | -1.334224 |
| 7                | 6                | 0              | -1.670162               | 3.844240  | -2.408862 |
| 8                | 6                | 0              | 0.659105                | 3.491095  | -0.913722 |
| 9                | 1                | 0              | 1.075540                | 2.641784  | 1.486252  |
| 10               | 6                | 0              | 0.930000                | 1.835791  | 3.969091  |
| 11               | 1                | 0              | -0.663937               | 0.767788  | 2.965835  |
| 12               | 1                | 0              | 0.945263                | 0.234130  | 2.502918  |
| 13               | 8                | 0              | 1.993131                | 0.066980  | -0.704809 |
| 14               | 1                | 0              | 1.509488                | -0.125856 | -1.524185 |
| 15               | 1                | 0              | 1.797081                | -0.670779 | -0.058179 |
| 16               | 8                | 0              | 1.616962                | -2.027926 | 0.916532  |
| 17               | 1                | 0              | 2.139710                | -1.995038 | 1.723520  |
| 18               | 1                | 0              | 2.382696                | -2.686338 | -0.111899 |
| 19               | 8                | 0              | 2.970959                | -3.041976 | -0.922012 |
| 20               | 1                | 0              | 3.190156                | -2.228318 | -1.393267 |
| 21               | 1                | 0              | 4.448113                | -3.356543 | -0.139911 |
| 22               | 8                | 0              | 5.314639                | -3.381441 | 0.351728  |
| 23               | 1                | 0              | 5.176650                | -3.984340 | 1.087597  |
| 24               | 1                | 0              | 1.564848                | -3.487153 | -2.147377 |
| 25               | 8                | 0              | 0.906618                | -3.369448 | -2.860526 |
| 26               | 1                | 0              | 0.033077                | -3.637931 | -2.499690 |
| 27               | 1                | 0              | 0.698553                | -1.749733 | -3.085895 |
| 28               | 8                | 0              | 0.525596                | -0.761310 | -3.109130 |
| 29               | 1                | 0              | 0.766548                | -0.460814 | -3.990038 |
| 30               | 1                | 0              | 5.827765                | -1.699501 | 0.670593  |
| 31               | 8                | 0              | 6.145613                | -0.771523 | 0.747579  |
| 32               | 1                | 0              | 6.919548                | -0.732537 | 0.178390  |
| 33               | 1                | 0              | -1.841434               | -0.103503 | -1.078641 |
| 34               | 8                | 0              | -2.033456               | -0.575727 | -1.907067 |
| 35               | 1                | 0              | -1.208350               | -0.516302 | -2.425955 |
| 36               | 1                | 0              | -1.901697               | -2.617156 | -2.026373 |
| 37               | 8                | 0              | -1.723681               | -3.571888 | -2.062985 |

|    |   |   |           |           |           |
|----|---|---|-----------|-----------|-----------|
| 38 | 1 | 0 | -2.133766 | -3.895922 | -1.239788 |
| 39 | 1 | 0 | -3.905841 | -1.226164 | -1.516707 |
| 40 | 8 | 0 | -4.610180 | -1.671153 | -1.020936 |
| 41 | 1 | 0 | -5.081313 | -0.970691 | -0.531714 |
| 42 | 1 | 0 | -1.063967 | -0.963393 | 1.128015  |
| 43 | 8 | 0 | -0.927002 | -1.876642 | 1.424373  |
| 44 | 1 | 0 | 0.060017  | -2.042088 | 1.256273  |
| 45 | 1 | 0 | -2.113373 | -2.095439 | 2.817379  |
| 46 | 8 | 0 | -3.006608 | -2.128746 | 3.219791  |
| 47 | 1 | 0 | -3.454406 | -2.769657 | 2.647780  |
| 48 | 1 | 0 | -2.275817 | -2.964499 | 0.725137  |
| 49 | 8 | 0 | -3.049473 | -3.512371 | 0.482712  |
| 50 | 1 | 0 | -3.671803 | -2.903675 | 0.034060  |
| 51 | 1 | 0 | 3.512323  | 0.848359  | -0.348028 |
| 52 | 8 | 0 | 4.294916  | 1.315487  | 0.026204  |
| 53 | 1 | 0 | 4.900148  | 0.616294  | 0.335252  |
| 54 | 1 | 0 | 3.589365  | 2.459625  | 1.047183  |
| 55 | 8 | 0 | 3.050855  | 3.134302  | 1.542943  |
| 56 | 1 | 0 | 3.599937  | 3.920325  | 1.600558  |
| 57 | 1 | 0 | -3.546792 | -0.427349 | 2.755902  |
| 58 | 8 | 0 | -3.719761 | 0.461568  | 2.373986  |
| 59 | 1 | 0 | -2.945266 | 0.649910  | 1.817980  |
| 60 | 1 | 0 | -5.094614 | 0.387309  | 1.319521  |
| 61 | 8 | 0 | -5.806707 | 0.293799  | 0.639446  |
| 62 | 1 | 0 | -6.065554 | 1.189219  | 0.406994  |
| 63 | 6 | 0 | 0.647266  | 4.367100  | -1.996397 |
| 64 | 6 | 0 | -0.515789 | 4.550835  | -2.743058 |
| 65 | 1 | 0 | -2.544843 | 2.393836  | -1.078168 |
| 66 | 1 | 0 | -2.576739 | 3.973660  | -2.989441 |
| 67 | 1 | 0 | 1.577457  | 3.349942  | -0.357645 |
| 68 | 1 | 0 | 1.554275  | 4.898622  | -2.262484 |
| 69 | 1 | 0 | -0.519599 | 5.233576  | -3.586054 |
| 70 | 1 | 0 | 1.934352  | 2.208652  | 3.757056  |
| 71 | 1 | 0 | 0.300028  | 2.680310  | 4.262979  |
| 72 | 1 | 0 | 0.987069  | 1.144435  | 4.813701  |

-----  
SCF Done: E(RB+HF-LYP) = -1779.27977846 A.U. after 2 cycles

Conv = 0.2767D-08 -V/T = 2.0045

Zero-point correction= 0.603199 (a.u.)

Thermal correction to Energy= 0.656616

Thermal correction to Enthalpy= 0.657561

Thermal correction to Gibbs Free Energy= 0.509767

Sum of electronic and zero-point Energies= -1778.676579

Sum of electronic and thermal Energies= -1778.623162

Sum of electronic and thermal Enthalpies= -1778.622218

Sum of electronic and thermal Free Energies= -1778.770011



(9-2) TS1(am), OH- addition step  
 Stoichiometry C9H44NO18(1-)  
 tuka02aaA.chk Stoichiometry C9H44NO18(1-)  
 Standard orientation:

| Center<br>Number | Atomic<br>Number | Atomic<br>Type | Coordinates (Angstroms) |           |           |
|------------------|------------------|----------------|-------------------------|-----------|-----------|
|                  |                  |                | X                       | Y         | Z         |
| 1                | 6                | 0              | -0.546702               | 2.408401  | -0.831962 |
| 2                | 6                | 0              | -0.209949               | 1.375026  | 0.257308  |
| 3                | 8                | 0              | -1.125726               | 0.463377  | 0.478868  |
| 4                | 7                | 0              | 0.301276                | 2.043319  | 1.396386  |
| 5                | 6                | 0              | 0.634211                | 1.289941  | 2.600510  |
| 6                | 6                | 0              | -1.881039               | 2.592709  | -1.197450 |
| 7                | 6                | 0              | -2.233385               | 3.546036  | -2.151956 |
| 8                | 6                | 0              | 0.431856                | 3.201553  | -1.440976 |
| 9                | 1                | 0              | 1.010526                | 2.734234  | 1.173419  |
| 10               | 6                | 0              | 0.858024                | 2.240735  | 3.775115  |
| 11               | 1                | 0              | -0.192119               | 0.614631  | 2.818619  |
| 12               | 1                | 0              | 1.531606                | 0.666739  | 2.461492  |
| 13               | 8                | 0              | 1.121639                | 0.568736  | -0.417193 |
| 14               | 1                | 0              | 0.860888                | 0.294566  | -1.315446 |
| 15               | 1                | 0              | 1.607333                | -0.819542 | 0.319802  |
| 16               | 8                | 0              | 1.998575                | -1.670110 | 0.688231  |
| 17               | 1                | 0              | 2.728946                | -1.390079 | 1.264102  |
| 18               | 1                | 0              | 2.793948                | -2.337676 | -0.641024 |
| 19               | 8                | 0              | 3.365370                | -2.673046 | -1.387501 |
| 20               | 1                | 0              | 3.513611                | -1.901171 | -1.946388 |
| 21               | 1                | 0              | 4.852117                | -3.010882 | -0.475095 |
| 22               | 8                | 0              | 5.587670                | -3.031905 | 0.181550  |
| 23               | 1                | 0              | 5.598775                | -3.928715 | 0.528516  |
| 24               | 1                | 0              | 1.757882                | -3.264009 | -2.567282 |
| 25               | 8                | 0              | 1.032144                | -3.086498 | -3.183682 |
| 26               | 1                | 0              | 0.210423                | -3.437763 | -2.757331 |
| 27               | 1                | 0              | 0.683750                | -1.409044 | -3.216648 |
| 28               | 8                | 0              | 0.423586                | -0.454962 | -3.119057 |
| 29               | 1                | 0              | 0.665185                | -0.013971 | -3.938400 |
| 30               | 1                | 0              | 5.107086                | -1.635362 | 1.206116  |
| 31               | 8                | 0              | 4.622429                | -0.874253 | 1.596727  |
| 32               | 1                | 0              | 5.065706                | -0.643693 | 2.418170  |
| 33               | 1                | 0              | -1.778238               | -0.392603 | -0.923320 |
| 34               | 8                | 0              | -2.097343               | -0.851482 | -1.740641 |
| 35               | 1                | 0              | -1.475221               | -0.556005 | -2.424074 |
| 36               | 1                | 0              | -1.673092               | -2.688066 | -1.979117 |
| 37               | 8                | 0              | -1.374879               | -3.612286 | -2.086363 |

|    |   |   |           |           |           |
|----|---|---|-----------|-----------|-----------|
| 38 | 1 | 0 | -1.663946 | -4.019150 | -1.244492 |
| 39 | 1 | 0 | -3.804403 | -1.690584 | -1.155424 |
| 40 | 8 | 0 | -4.423265 | -2.200765 | -0.608196 |
| 41 | 1 | 0 | -4.854338 | -1.542844 | -0.029421 |
| 42 | 1 | 0 | -0.837649 | -1.074203 | 1.177763  |
| 43 | 8 | 0 | -0.708531 | -1.964996 | 1.601204  |
| 44 | 1 | 0 | 0.237441  | -2.144265 | 1.470175  |
| 45 | 1 | 0 | -1.647388 | -1.876565 | 3.120108  |
| 46 | 8 | 0 | -2.330903 | -1.686780 | 3.799909  |
| 47 | 1 | 0 | -2.996484 | -2.369190 | 3.665412  |
| 48 | 1 | 0 | -1.878575 | -3.319194 | 0.883835  |
| 49 | 8 | 0 | -2.480781 | -3.968026 | 0.476440  |
| 50 | 1 | 0 | -3.255652 | -3.438323 | 0.196266  |
| 51 | 1 | 0 | 2.796548  | 1.095316  | -0.306049 |
| 52 | 8 | 0 | 3.738024  | 1.356855  | -0.155809 |
| 53 | 1 | 0 | 4.116631  | 0.651618  | 0.392087  |
| 54 | 1 | 0 | 3.511585  | 2.861746  | 0.771118  |
| 55 | 8 | 0 | 3.215843  | 3.642466  | 1.291451  |
| 56 | 1 | 0 | 3.454365  | 4.407839  | 0.761732  |
| 57 | 1 | 0 | -2.953921 | -0.053862 | 2.955328  |
| 58 | 8 | 0 | -3.219356 | 0.640946  | 2.324632  |
| 59 | 1 | 0 | -2.474904 | 0.696379  | 1.684448  |
| 60 | 1 | 0 | -4.666479 | 0.137711  | 1.572729  |
| 61 | 8 | 0 | -5.476559 | -0.209855 | 1.116665  |
| 62 | 1 | 0 | -5.923894 | 0.562893  | 0.761917  |
| 63 | 6 | 0 | 0.082329  | 4.155879  | -2.394399 |
| 64 | 6 | 0 | -1.253637 | 4.332345  | -2.754799 |
| 65 | 1 | 0 | -2.637856 | 1.975520  | -0.731725 |
| 66 | 1 | 0 | -3.275703 | 3.671106  | -2.426061 |
| 67 | 1 | 0 | 1.473342  | 3.062727  | -1.179526 |
| 68 | 1 | 0 | 0.855204  | 4.758811  | -2.860362 |
| 69 | 1 | 0 | -1.526431 | 5.072735  | -3.499576 |
| 70 | 1 | 0 | 1.675998  | 2.934771  | 3.562019  |
| 71 | 1 | 0 | -0.046519 | 2.821763  | 3.971965  |
| 72 | 1 | 0 | 1.111236  | 1.677335  | 4.678692  |

-----  
SCF Done: E(RB+HF-LYP) = -1779.24427796 A.U. after 1 cycles

Convrg = 0.5611D-08 -V/T = 2.0045

Zero-point correction= 0.604806 (a.u.)

Thermal correction to Energy= 0.656899

Thermal correction to Enthalpy= 0.657843

Thermal correction to Gibbs Free Energy= 0.515283

Sum of electronic and zero-point Energies= -1778.639472

Sum of electronic and thermal Energies= -1778.587379

Sum of electronic and thermal Enthalpies= -1778.586435

Sum of electronic and thermal Free Energies= -1778.728995

(9-3) TS2(am) toward the Mulliken CT complex  
stoichiometry C9H44NO18(1-)

tuka02bzA.chk Standard orientation:

| -----  |        |        |                         |           |           |  |
|--------|--------|--------|-------------------------|-----------|-----------|--|
| Center | Atomic | Atomic | Coordinates (Angstroms) |           |           |  |
| Number | Number | Type   | X                       | Y         | Z         |  |
| -----  |        |        |                         |           |           |  |
| 1      | 6      | 0      | -1.443656               | 0.990498  | -0.999210 |  |
| 2      | 6      | 0      | -1.791453               | -0.411947 | -0.447736 |  |
| 3      | 8      | 0      | -2.584070               | -0.398194 | 0.624447  |  |
| 4      | 7      | 0      | -0.470538               | -1.114289 | -0.103050 |  |
| 5      | 6      | 0      | -0.669353               | -2.502998 | 0.399191  |  |
| 6      | 6      | 0      | -1.828564               | 2.139827  | -0.307919 |  |
| 7      | 6      | 0      | -1.540028               | 3.405764  | -0.822096 |  |
| 8      | 6      | 0      | -0.852669               | 3.534761  | -2.028604 |  |
| 9      | 1      | 0      | 0.145875                | -1.138798 | -0.920861 |  |
| 10     | 1      | 0      | -1.208909               | -2.422750 | 1.342605  |  |
| 11     | 1      | 0      | -1.309554               | -3.031360 | -0.308311 |  |
| 12     | 6      | 0      | 0.651852                | -3.238935 | 0.591269  |  |
| 13     | 8      | 0      | -2.312465               | -1.205766 | -1.528189 |  |
| 14     | 1      | 0      | -3.218896               | -0.894619 | -1.699995 |  |
| 15     | 1      | 0      | -5.117214               | -2.941092 | -0.067859 |  |
| 16     | 8      | 0      | -5.469911               | -3.203265 | -0.959763 |  |
| 17     | 1      | 0      | -4.811419               | -3.806810 | -1.317445 |  |
| 18     | 1      | 0      | 0.108696                | -0.455394 | 0.719120  |  |
| 19     | 8      | 0      | 0.814315                | 0.257266  | 1.589525  |  |
| 20     | 1      | 0      | 0.250461                | 0.422462  | 2.356999  |  |
| 21     | 1      | 0      | 2.326631                | -0.367400 | 1.560439  |  |
| 22     | 8      | 0      | 3.213875                | -0.622913 | 1.168182  |  |
| 23     | 1      | 0      | 3.601832                | -1.417014 | 1.576851  |  |
| 24     | 1      | 0      | -5.390228               | -1.599809 | -1.704926 |  |
| 25     | 8      | 0      | -5.173813               | -0.672625 | -1.963034 |  |
| 26     | 1      | 0      | -5.525008               | -0.545474 | -2.848888 |  |
| 27     | 1      | 0      | -4.157340               | 0.355077  | 0.641001  |  |
| 28     | 8      | 0      | -5.103201               | 0.605779  | 0.783094  |  |
| 29     | 1      | 0      | -5.479731               | 0.530321  | -0.103874 |  |
| 30     | 1      | 0      | 2.691415                | -1.032795 | -0.553052 |  |
| 31     | 8      | 0      | 2.442011                | -1.151552 | -1.493693 |  |
| 32     | 1      | 0      | 2.614915                | -0.260466 | -1.862471 |  |
| 33     | 1      | 0      | 4.372986                | 0.542163  | 0.665524  |  |
| 34     | 8      | 0      | 5.053236                | 1.138073  | 0.264900  |  |
| 35     | 1      | 0      | 4.939936                | 1.984273  | 0.739591  |  |
| 36     | 1      | 0      | -3.658827               | -1.723308 | 1.053009  |  |
| 37     | 8      | 0      | -4.468830               | -2.214279 | 1.346311  |  |
| 38     | 1      | 0      | -5.071408               | -1.475843 | 1.526009  |  |

|    |   |   |           |           |           |
|----|---|---|-----------|-----------|-----------|
| 39 | 1 | 0 | 6.285004  | -0.077804 | 0.014015  |
| 40 | 8 | 0 | 6.744118  | -0.939674 | -0.126338 |
| 41 | 1 | 0 | 7.650624  | -0.726389 | -0.363065 |
| 42 | 1 | 0 | 3.993645  | -2.310323 | -1.635425 |
| 43 | 8 | 0 | 4.798664  | -2.814112 | -1.405079 |
| 44 | 1 | 0 | 5.486305  | -2.142847 | -1.273310 |
| 45 | 1 | 0 | -2.230074 | -0.185115 | 3.665892  |
| 46 | 8 | 0 | -1.929972 | 0.503325  | 3.064547  |
| 47 | 1 | 0 | -2.120134 | 0.150431  | 2.152881  |
| 48 | 1 | 0 | -3.361699 | 1.949393  | 3.028162  |
| 49 | 8 | 0 | -4.121165 | 2.524217  | 2.838823  |
| 50 | 1 | 0 | -4.627122 | 2.032616  | 2.173134  |
| 51 | 1 | 0 | 3.946429  | 1.490369  | -1.361438 |
| 52 | 8 | 0 | 3.121761  | 1.560063  | -1.873405 |
| 53 | 1 | 0 | 2.501311  | 1.932843  | -1.218734 |
| 54 | 1 | 0 | 0.835104  | 2.964259  | 0.207811  |
| 55 | 8 | 0 | 1.622229  | 2.462171  | 0.450445  |
| 56 | 1 | 0 | 1.276656  | 1.626957  | 0.920326  |
| 57 | 6 | 0 | -0.767392 | 1.128796  | -2.216768 |
| 58 | 6 | 0 | -0.464659 | 2.389462  | -2.724794 |
| 59 | 1 | 0 | -2.361890 | 2.050475  | 0.628394  |
| 60 | 1 | 0 | -1.860218 | 4.286999  | -0.276375 |
| 61 | 1 | 0 | -0.621584 | 4.517988  | -2.424493 |
| 62 | 1 | 0 | -0.483813 | 0.244445  | -2.775389 |
| 63 | 1 | 0 | 0.078681  | 2.477408  | -3.658864 |
| 64 | 1 | 0 | 1.207456  | -3.320466 | -0.345496 |
| 65 | 1 | 0 | 1.288395  | -2.736532 | 1.321116  |
| 66 | 1 | 0 | 0.451637  | -4.249970 | 0.956985  |
| 67 | 1 | 0 | 3.073120  | 3.165430  | 1.159617  |
| 68 | 8 | 0 | 3.958605  | 3.404437  | 1.523716  |
| 69 | 1 | 0 | 3.840266  | 3.411894  | 2.477877  |
| 70 | 1 | 0 | 5.762698  | -2.274896 | 1.325989  |
| 71 | 8 | 0 | 4.974374  | -2.823117 | 1.450224  |
| 72 | 1 | 0 | 4.776221  | -3.088526 | 0.530558  |

-----  
SCF Done: E(RB+HF-LYP) = -1779.23815810 A.U. after 3 cycles

Conv = 0.1606D-08 -V/T = 2.0045

Zero-point correction= 0.602525 (a.u.)

Thermal correction to Energy= 0.654001

Thermal correction to Enthalpy= 0.654945

Thermal correction to Gibbs Free Energy= 0.513845

Sum of electronic and zero-point Energies= -1778.635633

Sum of electronic and thermal Energies= -1778.584157

Sum of electronic and thermal Enthalpies= -1778.583213

Sum of electronic and thermal Free Energies= -1778.724313  
=====

[10] para-Y-substituted N-ethylbenzamide + OH(H<sub>2</sub>O)<sub>16</sub>, Y = MeO and NO<sub>2</sub>. precursor, TS1(am) and TS2(am)

(10-1) Y= MeO(CH<sub>3</sub>O), precursor

tuka02aaome.for.chk Stoichiometry C10H46NO19(1-)

Largest concise Abelian subgroup C1 NOp 1

Standard orientation:

| -----  |        |        |                         |           |           |  |
|--------|--------|--------|-------------------------|-----------|-----------|--|
| Center | Atomic | Atomic | Coordinates (Angstroms) |           |           |  |
| Number | Number | Type   | X                       | Y         | Z         |  |
| -----  |        |        |                         |           |           |  |
| 1      | 6      | 0      | -2.121205               | -1.104406 | 0.561960  |  |
| 2      | 6      | 0      | -0.858666               | -0.836162 | 1.316489  |  |
| 3      | 8      | 0      | 0.198429                | -1.454504 | 1.008143  |  |
| 4      | 7      | 0      | -0.906565               | 0.021432  | 2.346483  |  |
| 5      | 6      | 0      | 0.269557                | 0.407911  | 3.130060  |  |
| 6      | 6      | 0      | -2.248104               | -2.332274 | -0.110292 |  |
| 7      | 6      | 0      | -3.395233               | -2.638525 | -0.827170 |  |
| 8      | 6      | 0      | -3.173580               | -0.185155 | 0.480778  |  |
| 9      | 1      | 0      | -1.727718               | 0.614137  | 2.467119  |  |
| 10     | 6      | 0      | -0.136295               | 0.855323  | 4.532484  |  |
| 11     | 1      | 0      | 0.937957                | -0.453527 | 3.180197  |  |
| 12     | 1      | 0      | 0.806351                | 1.208956  | 2.607015  |  |
| 13     | 8      | 0      | -0.594346               | 1.825607  | -0.552651 |  |
| 14     | 1      | 0      | -0.605331               | 1.389401  | -1.427901 |  |
| 15     | 1      | 0      | 0.373937                | 1.939839  | -0.295468 |  |
| 16     | 8      | 0      | 1.956832                | 2.301001  | 0.073792  |  |
| 17     | 1      | 0      | 1.971109                | 2.910850  | 0.826735  |  |
| 18     | 1      | 0      | 2.005118                | 3.059483  | -1.135009 |  |
| 19     | 8      | 0      | 1.934498                | 3.629905  | -2.043114 |  |
| 20     | 1      | 0      | 0.978889                | 3.667837  | -2.214814 |  |
| 21     | 1      | 0      | 2.207290                | 5.154184  | -1.339487 |  |
| 22     | 8      | 0      | 2.270420                | 5.988585  | -0.786614 |  |
| 23     | 1      | 0      | 3.114301                | 5.918002  | -0.316293 |  |
| 24     | 1      | 0      | 2.225437                | 2.214550  | -3.245660 |  |
| 25     | 8      | 0      | 2.051800                | 1.448420  | -3.840387 |  |
| 26     | 1      | 0      | 2.663539                | 0.717080  | -3.570213 |  |
| 27     | 1      | 0      | 0.587467                | 0.830694  | -3.424762 |  |
| 28     | 8      | 0      | -0.271728               | 0.420457  | -3.081049 |  |
| 29     | 1      | 0      | -0.886024               | 0.400455  | -3.829257 |  |
| 30     | 1      | 0      | 0.868253                | 5.967973  | 0.296873  |  |
| 31     | 8      | 0      | 0.075713                | 5.994197  | 0.893560  |  |
| 32     | 1      | 0      | -0.354788               | 6.840111  | 0.702322  |  |
| 33     | 1      | 0      | 0.604790                | -1.730384 | -0.894551 |  |
| 34     | 8      | 0      | 0.765543                | -1.898588 | -1.846936 |  |
| 35     | 1      | 0      | 0.264850                | -1.192192 | -2.314512 |  |

|    |   |   |           |           |           |
|----|---|---|-----------|-----------|-----------|
| 36 | 1 | 0 | 2.443601  | -1.300192 | -2.693732 |
| 37 | 8 | 0 | 3.243931  | -0.909600 | -3.103282 |
| 38 | 1 | 0 | 3.942571  | -1.112848 | -2.443743 |
| 39 | 1 | 0 | 1.951495  | -3.498974 | -1.674756 |
| 40 | 8 | 0 | 2.731992  | -4.000252 | -1.371301 |
| 41 | 1 | 0 | 2.433064  | -4.559694 | -0.619157 |
| 42 | 1 | 0 | 1.899366  | -0.501092 | 0.854495  |
| 43 | 8 | 0 | 2.779854  | -0.085258 | 0.773131  |
| 44 | 1 | 0 | 2.573679  | 0.869623  | 0.489714  |
| 45 | 1 | 0 | 3.868413  | -1.018090 | 1.990280  |
| 46 | 8 | 0 | 4.301093  | -1.857311 | 2.268127  |
| 47 | 1 | 0 | 4.693223  | -2.157155 | 1.422944  |
| 48 | 1 | 0 | 3.793749  | -1.199837 | -0.289845 |
| 49 | 8 | 0 | 4.417210  | -1.856387 | -0.681074 |
| 50 | 1 | 0 | 3.879829  | -2.664527 | -0.867243 |
| 51 | 1 | 0 | -1.461468 | 3.194538  | 0.073681  |
| 52 | 8 | 0 | -1.883669 | 3.916115  | 0.610343  |
| 53 | 1 | 0 | -1.187059 | 4.597619  | 0.737046  |
| 54 | 1 | 0 | -2.371112 | 3.039357  | 1.975774  |
| 55 | 8 | 0 | -2.683796 | 2.405947  | 2.687382  |
| 56 | 1 | 0 | -3.560620 | 2.719673  | 2.950326  |
| 57 | 1 | 0 | 2.783950  | -2.825873 | 2.528141  |
| 58 | 8 | 0 | 1.887829  | -3.248968 | 2.553964  |
| 59 | 1 | 0 | 1.300729  | -2.631290 | 2.072375  |
| 60 | 1 | 0 | 1.957535  | -4.673945 | 1.590327  |
| 61 | 8 | 0 | 1.984657  | -5.428645 | 0.938584  |
| 62 | 1 | 0 | 1.126889  | -5.870758 | 1.010864  |
| 63 | 6 | 0 | -4.327885 | -0.478526 | -0.246282 |
| 64 | 6 | 0 | -4.442719 | -1.710318 | -0.900161 |
| 65 | 1 | 0 | -1.430749 | -3.043589 | -0.067284 |
| 66 | 1 | 0 | -3.497477 | -3.586894 | -1.345219 |
| 67 | 1 | 0 | -3.096148 | 0.785570  | 0.958805  |
| 68 | 1 | 0 | -5.116348 | 0.262836  | -0.302714 |
| 69 | 8 | 0 | -5.534090 | -2.095642 | -1.636651 |
| 70 | 1 | 0 | -0.828031 | 1.702829  | 4.490303  |
| 71 | 1 | 0 | -0.619028 | 0.037276  | 5.079587  |
| 72 | 1 | 0 | 0.754187  | 1.161742  | 5.092037  |
| 73 | 6 | 0 | -6.612404 | -1.180835 | -1.767982 |
| 74 | 1 | 0 | -7.057469 | -0.943758 | -0.792926 |
| 75 | 1 | 0 | -6.291289 | -0.251401 | -2.255209 |
| 76 | 1 | 0 | -7.353119 | -1.681455 | -2.393620 |

-----  
SCF Done: E(RB+HF-LYP) = -1893.08683444 A.U. after 1 cycles

Conv = 0.7549D-08 -V/T = 2.0093

Zero-point correction= 0.639390 (a.u.)

Thermal correction to Energy= 0.693874

Thermal correction to Enthalpy= 0.694819  
 Thermal correction to Gibbs Free Energy= 0.544924  
 Sum of electronic and zero-point Energies= -1892.447444  
 Sum of electronic and thermal Energies= -1892.392960  
 Sum of electronic and thermal Enthalpies= -1892.392016  
 Sum of electronic and thermal Free Energies= -1892.541911

(10-2) TS1(am), Y=MeO

tuka02aaome.chk Stoichiometry C10H46NO19(1-)

Standard orientation:

| -----  |        |        |                         |           |           |  |
|--------|--------|--------|-------------------------|-----------|-----------|--|
| Center | Atomic | Atomic | Coordinates (Angstroms) |           |           |  |
| Number | Number | Type   | X                       | Y         | Z         |  |
| -----  |        |        |                         |           |           |  |
| 1      | 6      | 0      | 2.172861                | 0.058594  | 0.234528  |  |
| 2      | 6      | 0      | 0.812803                | 0.124968  | 0.929476  |  |
| 3      | 8      | 0      | 0.091952                | 1.188496  | 0.696395  |  |
| 4      | 7      | 0      | 0.890573                | -0.333708 | 2.246646  |  |
| 5      | 6      | 0      | -0.283766               | -0.323108 | 3.116851  |  |
| 6      | 6      | 0      | 2.787366                | 1.254191  | -0.165048 |  |
| 7      | 6      | 0      | 4.042373                | 1.254738  | -0.764537 |  |
| 8      | 6      | 0      | 2.862398                | -1.138233 | 0.020446  |  |
| 9      | 1      | 0      | 1.441978                | -1.182993 | 2.357910  |  |
| 10     | 6      | 0      | 0.126205                | -0.595898 | 4.563394  |  |
| 11     | 1      | 0      | -0.754516               | 0.658896  | 3.044809  |  |
| 12     | 1      | 0      | -1.029223               | -1.065950 | 2.793046  |  |
| 13     | 8      | 0      | -0.059621               | -1.213592 | 0.059029  |  |
| 14     | 1      | 0      | 0.056722                | -1.025648 | -0.893422 |  |
| 15     | 1      | 0      | -1.673030               | -1.386550 | 0.301184  |  |
| 16     | 8      | 0      | -2.662542               | -1.525711 | 0.477696  |  |
| 17     | 1      | 0      | -2.710533               | -2.366829 | 0.973108  |  |
| 18     | 1      | 0      | -3.464060               | -1.962792 | -1.048497 |  |
| 19     | 8      | 0      | -3.856420               | -2.374867 | -1.861085 |  |
| 20     | 1      | 0      | -3.369959               | -1.968071 | -2.610926 |  |
| 21     | 1      | 0      | -3.788129               | -4.009488 | -1.540388 |  |
| 22     | 8      | 0      | -3.816458               | -4.940410 | -1.160711 |  |
| 23     | 1      | 0      | -4.759877               | -5.148773 | -1.093634 |  |
| 24     | 8      | 0      | -2.343846               | -0.954929 | -3.787750 |  |
| 25     | 1      | 0      | -2.532241               | 0.017605  | -3.543483 |  |
| 26     | 1      | 0      | -2.535240               | -1.025764 | -4.734683 |  |
| 27     | 1      | 0      | -0.602169               | -0.956750 | -3.276992 |  |
| 28     | 8      | 0      | 0.288856                | -0.761069 | -2.896859 |  |
| 29     | 1      | 0      | 0.862427                | -1.508434 | -3.120233 |  |
| 30     | 1      | 0      | -2.978011               | -4.680293 | 0.350975  |  |
| 31     | 8      | 0      | -2.484939               | -4.357026 | 1.153269  |  |
| 32     | 1      | 0      | -2.747172               | -4.922112 | 1.894214  |  |

|    |   |   |           |           |           |
|----|---|---|-----------|-----------|-----------|
| 33 | 1 | 0 | -0.033074 | 1.684112  | -0.976854 |
| 34 | 8 | 0 | -0.061275 | 1.956127  | -1.937384 |
| 35 | 1 | 0 | 0.408515  | 1.236411  | -2.399159 |
| 36 | 1 | 0 | -1.661753 | 1.743254  | -2.783386 |
| 37 | 8 | 0 | -2.541017 | 1.568907  | -3.199017 |
| 38 | 1 | 0 | -3.165608 | 1.975519  | -2.541827 |
| 39 | 1 | 0 | -0.773072 | 3.814799  | -1.790150 |
| 40 | 8 | 0 | -1.377273 | 4.535344  | -1.525749 |
| 41 | 1 | 0 | -0.956204 | 4.962762  | -0.744509 |
| 42 | 1 | 0 | -1.637181 | 1.193209  | 0.884483  |
| 43 | 8 | 0 | -2.629958 | 1.224922  | 0.976383  |
| 44 | 1 | 0 | -2.899600 | 0.280368  | 0.934554  |
| 45 | 1 | 0 | -2.845359 | 2.301293  | 2.355945  |
| 46 | 8 | 0 | -2.744178 | 3.014261  | 3.037903  |
| 47 | 1 | 0 | -3.226191 | 3.773022  | 2.675654  |
| 48 | 1 | 0 | -3.319061 | 2.306428  | -0.382586 |
| 49 | 8 | 0 | -3.643969 | 2.912318  | -1.086252 |
| 50 | 1 | 0 | -2.942234 | 3.601917  | -1.171187 |
| 51 | 1 | 0 | 0.196318  | -2.862525 | 0.383005  |
| 52 | 8 | 0 | 0.333404  | -3.814204 | 0.667140  |
| 53 | 1 | 0 | -0.570584 | -4.150450 | 0.830235  |
| 54 | 1 | 0 | 1.237201  | -3.605389 | 2.132123  |
| 55 | 8 | 0 | 1.788653  | -3.330240 | 2.914233  |
| 56 | 1 | 0 | 2.657108  | -3.732609 | 2.771380  |
| 57 | 1 | 0 | -0.908819 | 3.332806  | 2.731217  |
| 58 | 8 | 0 | -0.006130 | 3.444174  | 2.354913  |
| 59 | 1 | 0 | 0.138695  | 2.633822  | 1.807579  |
| 60 | 1 | 0 | -0.074751 | 4.820476  | 1.371096  |
| 61 | 8 | 0 | -0.155805 | 5.611678  | 0.763531  |
| 62 | 1 | 0 | 0.744954  | 5.946737  | 0.648835  |
| 63 | 6 | 0 | 4.125371  | -1.154874 | -0.579728 |
| 64 | 6 | 0 | 4.718378  | 0.048198  | -0.974282 |
| 65 | 1 | 0 | 2.265107  | 2.191047  | -0.005005 |
| 66 | 1 | 0 | 4.514546  | 2.181434  | -1.076904 |
| 67 | 1 | 0 | 2.406593  | -2.079613 | 0.306795  |
| 68 | 1 | 0 | 4.624286  | -2.105130 | -0.735279 |
| 69 | 8 | 0 | 5.955644  | 0.144245  | -1.575842 |
| 70 | 1 | 0 | 0.622144  | -1.568853 | 4.652187  |
| 71 | 1 | 0 | 0.814829  | 0.178603  | 4.918934  |
| 72 | 1 | 0 | -0.757378 | -0.597768 | 5.212832  |
| 73 | 6 | 0 | 6.677161  | -1.053499 | -1.803470 |
| 74 | 1 | 0 | 6.896062  | -1.577383 | -0.863246 |
| 75 | 1 | 0 | 6.131742  | -1.731750 | -2.473489 |
| 76 | 1 | 0 | 7.614259  | -0.754492 | -2.277311 |

-----  
SCF Done: E(RB+HF-LYP) = -1893.05649779 A.U. after 1 cycles



Convrg = 0.5166D-08      -V/T = 2.0093  
 Zero-point correction=      0.640600 (a.u.)  
 Thermal correction to Energy=      0.693667  
 Thermal correction to Enthalpy=      0.694611  
 Thermal correction to Gibbs Free Energy=      0.551135  
 Sum of electronic and zero-point Energies=      -1892.415898  
 Sum of electronic and thermal Energies=      -1892.362831  
 Sum of electronic and thermal Enthalpies=      -1892.361887  
 Sum of electronic and thermal Free Energies=      -1892.505363

(10-3) TS2(am), Y=MeO  
 tuka02bzome.chk    Stoichiometry C10H46NO19(1-)

Standard orientation:

| Center<br>Number | Atomic<br>Number | Atomic<br>Type | Coordinates (Angstroms) |           |           |
|------------------|------------------|----------------|-------------------------|-----------|-----------|
|                  |                  |                | X                       | Y         | Z         |
| 1                | 6                | 0              | -1.397385               | 0.904052  | -0.604076 |
| 2                | 6                | 0              | -1.803341               | -0.572130 | -0.470918 |
| 3                | 8                | 0              | -2.601009               | -0.845862 | 0.560041  |
| 4                | 7                | 0              | -0.482102               | -1.399609 | -0.312873 |
| 5                | 6                | 0              | -0.714152               | -2.874418 | -0.237084 |
| 6                | 6                | 0              | -1.747948               | 1.842297  | 0.375732  |
| 7                | 6                | 0              | -1.375411               | 3.177837  | 0.251619  |
| 8                | 6                | 0              | -0.627349               | 3.598593  | -0.855539 |
| 9                | 1                | 0              | 0.194294                | -1.189325 | -1.065292 |
| 10               | 1                | 0              | -1.358156               | -3.041969 | 0.627935  |
| 11               | 1                | 0              | -1.269354               | -3.154679 | -1.133666 |
| 12               | 6                | 0              | 0.586761                | -3.662176 | -0.120593 |
| 13               | 8                | 0              | -2.295874               | -1.054548 | -1.725308 |
| 14               | 1                | 0              | -3.185170               | -0.656743 | -1.852954 |
| 15               | 1                | 0              | -5.215271               | -2.952568 | -0.871838 |
| 16               | 8                | 0              | -5.533779               | -2.929595 | -1.821782 |
| 17               | 1                | 0              | -4.858969               | -3.410962 | -2.323763 |
| 18               | 1                | 0              | -0.005909               | -1.055216 | 0.578291  |
| 19               | 8                | 0              | 0.842890                | -0.513251 | 1.916253  |
| 20               | 1                | 0              | 0.185315                | -0.472247 | 2.634968  |
| 21               | 1                | 0              | 2.369367                | -1.281169 | 1.627565  |
| 22               | 8                | 0              | 3.177492                | -1.402067 | 1.059480  |
| 23               | 1                | 0              | 3.592739                | -2.289187 | 1.151878  |
| 24               | 1                | 0              | -5.336154               | -1.210129 | -2.066358 |
| 25               | 8                | 0              | -5.046694               | -0.257901 | -2.048659 |
| 26               | 1                | 0              | -5.334590               | 0.139307  | -2.883421 |
| 27               | 1                | 0              | -4.147067               | -0.054429 | 0.739275  |
| 28               | 8                | 0              | -5.101473               | 0.157840  | 0.917126  |

|    |   |   |           |           |           |
|----|---|---|-----------|-----------|-----------|
| 29 | 1 | 0 | -5.445819 | 0.366424  | 0.030613  |
| 30 | 1 | 0 | 2.509875  | -1.212165 | -0.607819 |
| 31 | 8 | 0 | 2.233777  | -1.011017 | -1.535373 |
| 32 | 1 | 0 | 2.420756  | -0.035091 | -1.583586 |
| 33 | 1 | 0 | 4.332422  | -0.089548 | 0.886273  |
| 34 | 8 | 0 | 5.020612  | 0.585727  | 0.659180  |
| 35 | 1 | 0 | 4.896414  | 1.287251  | 1.347518  |
| 36 | 1 | 0 | -3.747260 | -2.196696 | 0.568665  |
| 37 | 8 | 0 | -4.598657 | -2.695630 | 0.700340  |
| 38 | 1 | 0 | -5.173787 | -1.983092 | 1.043882  |
| 39 | 1 | 0 | 6.192343  | -0.502188 | 0.001599  |
| 40 | 8 | 0 | 6.626953  | -1.286876 | -0.429827 |
| 41 | 1 | 0 | 7.517096  | -1.001035 | -0.680478 |
| 42 | 1 | 0 | 3.760928  | -1.998921 | -2.096879 |
| 43 | 8 | 0 | 4.573521  | -2.556457 | -2.094880 |
| 44 | 1 | 0 | 5.293110  | -1.967659 | -1.791142 |
| 45 | 1 | 0 | -2.213372 | -1.359863 | 3.588360  |
| 46 | 8 | 0 | -1.912082 | -0.550360 | 3.149166  |
| 47 | 1 | 0 | -2.126232 | -0.678973 | 2.180408  |
| 48 | 1 | 0 | -3.437144 | 0.719799  | 3.523370  |
| 49 | 8 | 0 | -4.269583 | 1.232089  | 3.552200  |
| 50 | 1 | 0 | -4.725788 | 1.005585  | 2.718831  |
| 51 | 1 | 0 | 3.813782  | 1.422389  | -0.730520 |
| 52 | 8 | 0 | 2.922552  | 1.613553  | -1.087191 |
| 53 | 1 | 0 | 2.382801  | 1.706975  | -0.250465 |
| 54 | 1 | 0 | 0.986301  | 2.343897  | 1.358152  |
| 55 | 8 | 0 | 1.714887  | 1.704341  | 1.374334  |
| 56 | 1 | 0 | 1.221333  | 0.579346  | 1.690672  |
| 57 | 6 | 0 | -0.674625 | 1.345314  | -1.716871 |
| 58 | 6 | 0 | -0.280800 | 2.676830  | -1.849442 |
| 59 | 1 | 0 | -2.315382 | 1.530253  | 1.244844  |
| 60 | 1 | 0 | -1.649715 | 3.905526  | 1.009435  |
| 61 | 8 | 0 | -0.284704 | 4.927151  | -0.886056 |
| 62 | 1 | 0 | -0.409449 | 0.641310  | -2.500478 |
| 63 | 1 | 0 | 0.305822  | 2.973465  | -2.710276 |
| 64 | 1 | 0 | 1.238781  | -3.495270 | -0.983472 |
| 65 | 1 | 0 | 1.140504  | -3.395342 | 0.784238  |
| 66 | 1 | 0 | 0.353878  | -4.731871 | -0.071693 |
| 67 | 1 | 0 | 3.083132  | 2.202230  | 2.105864  |
| 68 | 8 | 0 | 4.011861  | 2.391658  | 2.472080  |
| 69 | 1 | 0 | 3.983732  | 2.099576  | 3.394759  |
| 70 | 1 | 0 | 5.668998  | -3.032670 | 0.605462  |
| 71 | 8 | 0 | 4.845301  | -3.547525 | 0.528642  |
| 72 | 1 | 0 | 4.631193  | -3.436063 | -0.429066 |
| 73 | 6 | 0 | 0.679305  | 5.341403  | -1.846791 |
| 74 | 1 | 0 | 1.595821  | 4.744561  | -1.768361 |

|    |   |   |          |          |           |
|----|---|---|----------|----------|-----------|
| 75 | 1 | 0 | 0.283322 | 5.272648 | -2.868872 |
| 76 | 1 | 0 | 0.896998 | 6.386036 | -1.616685 |

SCF Done: E(RB+HF-LYP) = -1893.04834908 A.U. after 1 cycles

Conv = 0.3567D-08 -V/T = 2.0093

Zero-point correction= 0.638580 (a.u.)

Thermal correction to Energy= 0.691004

Thermal correction to Enthalpy= 0.691948

Thermal correction to Gibbs Free Energy= 0.548583

Sum of electronic and zero-point Energies= -1892.409769

Sum of electronic and thermal Energies= -1892.357345

Sum of electronic and thermal Enthalpies= -1892.356401

Sum of electronic and thermal Free Energies= -1892.499766

(10-4) precursor, Y=NO2

tuka02aano2.for.chk Stoichiometry C9H43N2O20(1-)

Standard orientation:

| Center Number | Atomic Number | Atomic Type | Coordinates (Angstroms) |           |           |
|---------------|---------------|-------------|-------------------------|-----------|-----------|
|               |               |             | X                       | Y         | Z         |
| 1             | 6             | 0           | 2.212908                | -0.020542 | 0.713925  |
| 2             | 6             | 0           | 0.917334                | 0.306723  | 1.408306  |
| 3             | 8             | 0           | 0.280904                | 1.336460  | 1.064696  |
| 4             | 7             | 0           | 0.534228                | -0.479950 | 2.419459  |
| 5             | 6             | 0           | -0.712623               | -0.273779 | 3.163853  |
| 6             | 6             | 0           | 2.909068                | 1.038319  | 0.111856  |
| 7             | 6             | 0           | 4.121385                | 0.817040  | -0.532495 |
| 8             | 6             | 0           | 2.736304                | -1.321147 | 0.646108  |
| 9             | 1             | 0           | 0.980568                | -1.389207 | 2.552533  |
| 10            | 6             | 0           | -0.615780               | -0.879567 | 4.561686  |
| 11            | 1             | 0           | -0.895826               | 0.800986  | 3.220731  |
| 12            | 1             | 0           | -1.542485               | -0.718355 | 2.601157  |
| 13            | 8             | 0           | -0.395642               | -1.834101 | -0.503284 |
| 14            | 1             | 0           | -0.200809               | -1.480738 | -1.394625 |
| 15            | 1             | 0           | -1.334789               | -1.540270 | -0.274459 |
| 16            | 8             | 0           | -2.924274               | -1.179194 | 0.008993  |
| 17            | 1             | 0           | -3.262842               | -1.715951 | 0.741256  |
| 18            | 1             | 0           | -3.282388               | -1.823078 | -1.230109 |
| 19            | 8             | 0           | -3.464434               | -2.347640 | -2.143184 |
| 20            | 1             | 0           | -2.630700               | -2.815516 | -2.315096 |
| 21            | 1             | 0           | -4.407591               | -3.611465 | -1.493162 |
| 22            | 8             | 0           | -4.826067               | -4.370878 | -0.991079 |
| 23            | 1             | 0           | -5.598046               | -3.993229 | -0.544586 |
| 24            | 1             | 0           | -3.056305               | -0.940108 | -3.326297 |

|    |   |   |           |           |           |
|----|---|---|-----------|-----------|-----------|
| 25 | 8 | 0 | -2.525446 | -0.343817 | -3.902945 |
| 26 | 1 | 0 | -2.738894 | 0.588980  | -3.644827 |
| 27 | 1 | 0 | -0.964126 | -0.479204 | -3.437347 |
| 28 | 8 | 0 | -0.022271 | -0.516443 | -3.064848 |
| 29 | 1 | 0 | 0.549735  | -0.802081 | -3.792417 |
| 30 | 1 | 0 | -3.580467 | -5.037624 | 0.081210  |
| 31 | 8 | 0 | -2.867240 | -5.459764 | 0.625679  |
| 32 | 1 | 0 | -2.791150 | -6.361416 | 0.280528  |
| 33 | 1 | 0 | 0.110887  | 1.774979  | -0.884830 |
| 34 | 8 | 0 | 0.118365  | 2.014814  | -1.833534 |
| 35 | 1 | 0 | 0.228718  | 1.159626  | -2.309122 |
| 36 | 1 | 0 | -1.636588 | 2.288643  | -2.753461 |
| 37 | 8 | 0 | -2.520261 | 2.298953  | -3.175415 |
| 38 | 1 | 0 | -3.064649 | 2.790969  | -2.521838 |
| 39 | 1 | 0 | -0.219229 | 3.990133  | -1.637095 |
| 40 | 8 | 0 | -0.711675 | 4.778026  | -1.339868 |
| 41 | 1 | 0 | -0.218423 | 5.151263  | -0.575260 |
| 42 | 1 | 0 | -1.666333 | 1.289717  | 0.839749  |
| 43 | 8 | 0 | -2.634455 | 1.320178  | 0.717286  |
| 44 | 1 | 0 | -2.869245 | 0.374248  | 0.422292  |
| 45 | 1 | 0 | -3.223505 | 2.651107  | 1.908281  |
| 46 | 8 | 0 | -3.225271 | 3.592897  | 2.193459  |
| 47 | 1 | 0 | -3.409042 | 4.048884  | 1.347520  |
| 48 | 1 | 0 | -2.982400 | 2.775072  | -0.363027 |
| 49 | 8 | 0 | -3.216809 | 3.643529  | -0.766480 |
| 50 | 1 | 0 | -2.361550 | 4.116986  | -0.910460 |
| 51 | 1 | 0 | -0.295412 | -3.483622 | 0.052127  |
| 52 | 8 | 0 | -0.242817 | -4.331327 | 0.566987  |
| 53 | 1 | 0 | -1.162935 | -4.673327 | 0.624574  |
| 54 | 1 | 0 | 0.504273  | -3.799593 | 1.975477  |
| 55 | 8 | 0 | 1.031507  | -3.372082 | 2.715910  |
| 56 | 1 | 0 | 1.622224  | -4.060026 | 3.054036  |
| 57 | 1 | 0 | -1.454281 | 3.757186  | 2.526007  |
| 58 | 8 | 0 | -0.465064 | 3.721719  | 2.592956  |
| 59 | 1 | 0 | -0.207372 | 2.912740  | 2.108714  |
| 60 | 1 | 0 | 0.153072  | 5.037815  | 1.664442  |
| 61 | 8 | 0 | 0.479111  | 5.727902  | 1.023574  |
| 62 | 1 | 0 | 1.426559  | 5.827758  | 1.192293  |
| 63 | 6 | 0 | 3.944767  | -1.557972 | -0.001654 |
| 64 | 6 | 0 | 4.625430  | -0.483303 | -0.575786 |
| 65 | 1 | 0 | 2.486564  | 2.035645  | 0.148151  |
| 66 | 1 | 0 | 4.670088  | 1.627022  | -0.996530 |
| 67 | 1 | 0 | 2.198116  | -2.157935 | 1.077495  |
| 68 | 1 | 0 | 4.356615  | -2.557105 | -0.070600 |
| 69 | 7 | 0 | 5.909405  | -0.728589 | -1.247297 |
| 70 | 1 | 0 | -0.408251 | -1.953213 | 4.512387  |

|    |   |   |           |           |           |
|----|---|---|-----------|-----------|-----------|
| 71 | 1 | 0 | 0.177207  | -0.396406 | 5.143901  |
| 72 | 1 | 0 | -1.564007 | -0.733438 | 5.089800  |
| 73 | 8 | 0 | 6.340082  | -1.885082 | -1.272623 |
| 74 | 8 | 0 | 6.495113  | 0.234387  | -1.749959 |

-----

SCF Done: E(RB+HF-LYP) = -1983.07780819 A.U. after 1 cycles

Conv = 0.3822D-08 -V/T = 2.0093

S\*\*2 = 0.0000

Zero-point correction= 0.609038(a.u.)  
 Thermal correction to Energy= 0.663442  
 Thermal correction to Enthalpy= 0.664386  
 Thermal correction to Gibbs Free Energy= 0.514915  
 Sum of electronic and zero-point Energies= -1982.468770  
 Sum of electronic and thermal Energies= -1982.414366  
 Sum of electronic and thermal Enthalpies= -1982.413422  
 Sum of electronic and thermal Free Energies= -1982.562893

(10-5) TS1(am), Y=NO2

tuka02aano2.chk Stoichiometry C9H43N2O20(1-)

Standard orientation:

-----

| Center<br>Number | Atomic<br>Number | Atomic<br>Type | Coordinates (Angstroms) |           |           |
|------------------|------------------|----------------|-------------------------|-----------|-----------|
|                  |                  |                | X                       | Y         | Z         |
| 1                | 6                | 0              | 2.003506                | -0.382541 | 0.325705  |
| 2                | 6                | 0              | 0.596931                | -0.193648 | 0.909974  |
| 3                | 8                | 0              | 0.070439                | 0.989661  | 0.770460  |
| 4                | 7                | 0              | 0.509247                | -0.805230 | 2.167612  |
| 5                | 6                | 0              | -0.694690               | -0.672563 | 2.984689  |
| 6                | 6                | 0              | 2.767614                | 0.754171  | 0.032045  |
| 7                | 6                | 0              | 4.068817                | 0.638487  | -0.448776 |
| 8                | 6                | 0              | 2.568593                | -1.652578 | 0.124662  |
| 9                | 1                | 0              | 0.898806                | -1.745621 | 2.205278  |
| 10               | 6                | 0              | -0.416350               | -1.124921 | 4.417407  |
| 11               | 1                | 0              | -0.999270               | 0.375196  | 2.977277  |
| 12               | 1                | 0              | -1.531640               | -1.257010 | 2.568429  |
| 13               | 8                | 0              | -0.329607               | -1.268323 | -0.163109 |
| 14               | 1                | 0              | -0.151828               | -0.987166 | -1.085665 |
| 15               | 1                | 0              | -1.930816               | -1.144181 | -0.005323 |
| 16               | 8                | 0              | -2.949570               | -1.146586 | 0.027441  |
| 17               | 1                | 0              | -3.189496               | -1.898198 | 0.606302  |
| 18               | 1                | 0              | -3.342257               | -1.707211 | -1.497842 |
| 19               | 8                | 0              | -3.565829               | -2.137946 | -2.378265 |
| 20               | 1                | 0              | -2.740546               | -2.562874 | -2.663358 |

|    |   |   |           |           |           |
|----|---|---|-----------|-----------|-----------|
| 21 | 1 | 0 | -4.607579 | -3.428673 | -1.796403 |
| 22 | 8 | 0 | -5.082680 | -4.123620 | -1.266840 |
| 23 | 1 | 0 | -6.011817 | -3.850657 | -1.249148 |
| 24 | 1 | 0 | -3.118304 | -0.479956 | -3.472258 |
| 25 | 8 | 0 | -2.477799 | 0.054683  | -3.978478 |
| 26 | 1 | 0 | -2.594543 | 1.006748  | -3.699132 |
| 27 | 1 | 0 | -0.931554 | -0.264463 | -3.399787 |
| 28 | 8 | 0 | -0.030234 | -0.407570 | -2.978972 |
| 29 | 1 | 0 | 0.516582  | -0.852129 | -3.643222 |
| 30 | 1 | 0 | -4.147658 | -4.039452 | 0.234317  |
| 31 | 8 | 0 | -3.503515 | -3.797407 | 0.949318  |
| 32 | 1 | 0 | -3.775627 | -4.261579 | 1.754389  |
| 33 | 1 | 0 | 0.103519  | 1.782480  | -0.852436 |
| 34 | 8 | 0 | 0.181671  | 2.167570  | -1.762875 |
| 35 | 1 | 0 | 0.375457  | 1.386371  | -2.320615 |
| 36 | 1 | 0 | -1.439766 | 2.538668  | -2.721959 |
| 37 | 8 | 0 | -2.314482 | 2.614358  | -3.162820 |
| 38 | 1 | 0 | -2.855636 | 3.062768  | -2.467751 |
| 39 | 1 | 0 | -0.141590 | 4.105151  | -1.359424 |
| 40 | 8 | 0 | -0.586903 | 4.894459  | -0.996021 |
| 41 | 1 | 0 | -0.113969 | 5.112318  | -0.160411 |
| 42 | 1 | 0 | -1.637798 | 1.313400  | 0.807197  |
| 43 | 8 | 0 | -2.610187 | 1.525413  | 0.846978  |
| 44 | 1 | 0 | -3.036134 | 0.670705  | 0.623256  |
| 45 | 1 | 0 | -2.766730 | 2.487882  | 2.333226  |
| 46 | 8 | 0 | -2.597779 | 3.116427  | 3.078388  |
| 47 | 1 | 0 | -2.883804 | 3.978905  | 2.740159  |
| 48 | 1 | 0 | -3.015318 | 3.021419  | -0.250561 |
| 49 | 8 | 0 | -3.175950 | 3.812212  | -0.808993 |
| 50 | 1 | 0 | -2.325067 | 4.313550  | -0.791848 |
| 51 | 1 | 0 | -0.503920 | -2.991522 | 0.000438  |
| 52 | 8 | 0 | -0.671717 | -3.954771 | 0.196756  |
| 53 | 1 | 0 | -1.615733 | -4.005354 | 0.445772  |
| 54 | 1 | 0 | 0.302514  | -4.085958 | 1.643634  |
| 55 | 8 | 0 | 0.878957  | -3.942784 | 2.440170  |
| 56 | 1 | 0 | 1.574185  | -4.614490 | 2.393433  |
| 57 | 1 | 0 | -0.718467 | 3.074966  | 2.978792  |
| 58 | 8 | 0 | 0.228983  | 3.019308  | 2.716871  |
| 59 | 1 | 0 | 0.268817  | 2.272816  | 2.072801  |
| 60 | 1 | 0 | 0.587813  | 4.488026  | 1.934424  |
| 61 | 8 | 0 | 0.730664  | 5.346195  | 1.443065  |
| 62 | 1 | 0 | 1.687829  | 5.487874  | 1.425320  |
| 63 | 6 | 0 | 3.867200  | -1.788960 | -0.350757 |
| 64 | 6 | 0 | 4.606752  | -0.636364 | -0.631667 |
| 65 | 1 | 0 | 2.328446  | 1.733388  | 0.180273  |
| 66 | 1 | 0 | 4.664400  | 1.513608  | -0.678016 |

|    |   |   |           |           |           |
|----|---|---|-----------|-----------|-----------|
| 67 | 1 | 0 | 1.985117  | -2.540782 | 0.337578  |
| 68 | 1 | 0 | 4.310836  | -2.764439 | -0.507828 |
| 69 | 7 | 0 | 5.976647  | -0.771853 | -1.128211 |
| 70 | 1 | 0 | -0.084840 | -2.169225 | 4.441419  |
| 71 | 1 | 0 | 0.363143  | -0.502944 | 4.870182  |
| 72 | 1 | 0 | -1.325103 | -1.037697 | 5.024636  |
| 73 | 8 | 0 | 6.431629  | -1.911096 | -1.286579 |
| 74 | 8 | 0 | 6.618638  | 0.257120  | -1.365377 |

-----  
 SCF Done: E(RB+HF-LYP) = -1983.04975966 A.U. after 1 cycles

Conv = 0.4205D-08 -V/T = 2.0092

S\*\*2 = 0.0000

Zero-point correction= 0.610950 (a.u.)  
 Thermal correction to Energy= 0.664146  
 Thermal correction to Enthalpy= 0.665090  
 Thermal correction to Gibbs Free Energy= 0.519627  
 Sum of electronic and zero-point Energies= -1982.438810  
 Sum of electronic and thermal Energies= -1982.385614  
 Sum of electronic and thermal Enthalpies= -1982.384669  
 Sum of electronic and thermal Free Energies= -1982.530133

(10-6) TS2(am), Y=NO2

tuka02bzno2.chk Stoichiometry C9H43N2O20(1-)

Standard orientation:

-----

| Center<br>Number | Atomic<br>Number | Atomic<br>Type | Coordinates (Angstroms) |           |           |
|------------------|------------------|----------------|-------------------------|-----------|-----------|
|                  |                  |                | X                       | Y         | Z         |
| 1                | 6                | 0              | -1.374096               | 0.701285  | -0.568993 |
| 2                | 6                | 0              | -1.660668               | -0.813886 | -0.448966 |
| 3                | 8                | 0              | -2.444876               | -1.148457 | 0.571402  |
| 4                | 7                | 0              | -0.290762               | -1.540934 | -0.293374 |
| 5                | 6                | 0              | -0.431687               | -3.030150 | -0.236717 |
| 6                | 6                | 0              | -1.831543               | 1.589505  | 0.412093  |
| 7                | 6                | 0              | -1.643488               | 2.963112  | 0.270112  |
| 8                | 6                | 0              | -0.985472               | 3.437181  | -0.865226 |
| 9                | 1                | 0              | 0.382446                | -1.281021 | -1.037491 |
| 10               | 1                | 0              | -1.041056               | -3.250115 | 0.641344  |
| 11               | 1                | 0              | -0.991340               | -3.328439 | -1.124476 |
| 12               | 6                | 0              | 0.915759                | -3.741006 | -0.166367 |
| 13               | 8                | 0              | -2.114684               | -1.293362 | -1.714211 |
| 14               | 1                | 0              | -3.057095               | -1.024925 | -1.806088 |
| 15               | 1                | 0              | -4.944193               | -3.479657 | -0.795196 |
| 16               | 8                | 0              | -5.316589               | -3.470844 | -1.724377 |
| 17               | 1                | 0              | -4.699339               | -3.995800 | -2.255293 |

-----

|    |   |   |           |           |           |
|----|---|---|-----------|-----------|-----------|
| 18 | 1 | 0 | 0.156441  | -1.181639 | 0.609113  |
| 19 | 8 | 0 | 0.956969  | -0.617156 | 1.954490  |
| 20 | 1 | 0 | 0.311533  | -0.655044 | 2.683969  |
| 21 | 1 | 0 | 2.543655  | -1.282626 | 1.609646  |
| 22 | 8 | 0 | 3.334032  | -1.337066 | 1.010575  |
| 23 | 1 | 0 | 3.820162  | -2.190704 | 1.078355  |
| 24 | 1 | 0 | -5.163186 | -1.753275 | -2.003597 |
| 25 | 8 | 0 | -4.916197 | -0.789425 | -1.986392 |
| 26 | 1 | 0 | -5.224908 | -0.405386 | -2.820122 |
| 27 | 1 | 0 | -4.055888 | -0.504299 | 0.774341  |
| 28 | 8 | 0 | -5.016519 | -0.375520 | 0.990299  |
| 29 | 1 | 0 | -5.411918 | -0.190223 | 0.120418  |
| 30 | 1 | 0 | 2.625995  | -1.165680 | -0.633031 |
| 31 | 8 | 0 | 2.295278  | -0.950086 | -1.539844 |
| 32 | 1 | 0 | 2.406822  | 0.040746  | -1.549852 |
| 33 | 1 | 0 | 4.402271  | 0.048803  | 0.799000  |
| 34 | 8 | 0 | 5.037392  | 0.769017  | 0.559448  |
| 35 | 1 | 0 | 4.922154  | 1.427338  | 1.290423  |
| 36 | 1 | 0 | -3.480034 | -2.609892 | 0.600579  |
| 37 | 8 | 0 | -4.284817 | -3.171255 | 0.755589  |
| 38 | 1 | 0 | -4.905724 | -2.504784 | 1.112230  |
| 39 | 1 | 0 | 6.260191  | -0.231398 | -0.137814 |
| 40 | 8 | 0 | 6.733948  | -0.983019 | -0.587597 |
| 41 | 1 | 0 | 7.595073  | -0.636754 | -0.862515 |
| 42 | 1 | 0 | 3.875413  | -1.832963 | -2.179818 |
| 43 | 8 | 0 | 4.713138  | -2.349430 | -2.198157 |
| 44 | 1 | 0 | 5.411805  | -1.725692 | -1.914935 |
| 45 | 1 | 0 | -2.064821 | -1.708956 | 3.612514  |
| 46 | 8 | 0 | -1.785686 | -0.888315 | 3.179543  |
| 47 | 1 | 0 | -1.987939 | -1.014204 | 2.209637  |
| 48 | 1 | 0 | -3.278227 | 0.421373  | 3.487604  |
| 49 | 8 | 0 | -4.060150 | 1.005299  | 3.428060  |
| 50 | 1 | 0 | -4.578837 | 0.650459  | 2.680520  |
| 51 | 1 | 0 | 3.688071  | 1.580625  | -0.722635 |
| 52 | 8 | 0 | 2.761963  | 1.686186  | -1.020824 |
| 53 | 1 | 0 | 2.269453  | 1.750435  | -0.154325 |
| 54 | 1 | 0 | 0.969725  | 2.301528  | 1.625861  |
| 55 | 8 | 0 | 1.694062  | 1.669078  | 1.507769  |
| 56 | 1 | 0 | 1.262685  | 0.502237  | 1.782022  |
| 57 | 6 | 0 | -0.709519 | 1.207858  | -1.695887 |
| 58 | 6 | 0 | -0.503554 | 2.574440  | -1.851015 |
| 59 | 1 | 0 | -2.354742 | 1.217885  | 1.284838  |
| 60 | 1 | 0 | -2.009752 | 3.656521  | 1.017447  |
| 61 | 7 | 0 | -0.809552 | 4.884515  | -1.036683 |
| 62 | 1 | 0 | -0.360234 | 0.529266  | -2.467124 |
| 63 | 1 | 0 | 0.022661  | 2.971734  | -2.709390 |



|    |   |   |           |           |           |
|----|---|---|-----------|-----------|-----------|
| 64 | 1 | 0 | 1.532004  | -3.528502 | -1.045215 |
| 65 | 1 | 0 | 1.479222  | -3.454075 | 0.725958  |
| 66 | 1 | 0 | 0.744671  | -4.822483 | -0.124727 |
| 67 | 1 | 0 | 3.096944  | 2.174387  | 2.198699  |
| 68 | 8 | 0 | 4.030077  | 2.391326  | 2.529826  |
| 69 | 1 | 0 | 4.065985  | 2.047686  | 3.434202  |
| 70 | 1 | 0 | 5.919154  | -2.788761 | 0.461685  |
| 71 | 8 | 0 | 5.122593  | -3.347296 | 0.404418  |
| 72 | 1 | 0 | 4.875286  | -3.241522 | -0.545865 |
| 73 | 8 | 0 | -0.354410 | 5.292478  | -2.109257 |
| 74 | 8 | 0 | -1.133369 | 5.624433  | -0.102598 |

-----

SCF Done: E(RB+HF-LYP) = -1983.04011267 A.U. after 1 cycles

Conv = 0.6356D-08 -V/T = 2.0092

S\*\*2 = 0.0000

Zero-point correction= 0.607971 (a.u.)  
 Thermal correction to Energy= 0.660482  
 Thermal correction to Enthalpy= 0.661426  
 Thermal correction to Gibbs Free Energy= 0.516834  
 Sum of electronic and zero-point Energies= -1982.432141  
 Sum of electronic and thermal Energies= -1982.379631  
 Sum of electronic and thermal Enthalpies= -1982.378686  
 Sum of electronic and thermal Free Energies= -1982.523279
